# Supplementary material for: Synthesis of benzyl esters from the commercially available alcohols catalyzed by TBAI via C(sp3)–H bond functionalization
Source: Royal Society of Chemistry journal article supplement (doi:10.1039/c6ra26387a), 2017-01-01

Supplementary information

## Synthesis of Benzyl Esters from Available Alcohols Catalyzed by TBAI via C(sp<sup>3</sup>)-H Bond Functionalization

Zu-Li Wang,<sup>a\*</sup> Dao-Qing Dong<sup>a</sup> and Hui Zhang<sup>a</sup>

### 1. Instrument

Column chromatography was generally performed on silica gel (200-300 mesh) and reactions were monitored by thin layer chromatography (TLC) using UV light to visualize the course of the reactions. CDCl<sub>3</sub> was purchased from Energy Chemical. NMR spectra were recorded at 500 MHz BRUKER spectrometers. <sup>1</sup>H NMR chemical shifts (δ) are given in ppm relative to TMS (δ = 0.0). Chemical shifts for <sup>13</sup>C NMR spectra are reported in parts per million (ppm) from tetramethylsilane with the solvent as the internal standard at room temperature. All major chemicals and solvents were obtained from commercial sources and used without further purification.

**2. Synthesis of *tert*-butyl peresters catalysed by Bu<sub>4</sub>NI:** Under air, alcohols (1 mmol), 2-alkyl azaarenes (0.5 mmol), TBAI (0.2 mmol), TBHP (4.0 mmol), water (2 mL) were mixed in a screw cap vial. The mixture was stirred at 90°C in a closed reaction vessel. The reaction was monitored by TLC. After completion of the reaction, the solvent was evaporated under reduced pressure and the residue purified by column chromatography on silica gel to give the desired product.

### 4. Characterization data of products:

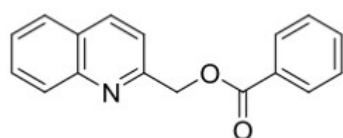

(3a) quinolin-2-ylmethyl benzoate: C<sub>17</sub>H<sub>13</sub>NO<sub>2</sub> Yellow

liquid. <sup>1</sup>H NMR (500 MHz, CDCl<sub>3</sub>) δ 8.22 – 8.00 (m, 4H), 7.87 – 7.79 (m, 1H), 7.72 (ddd, *J* = 8.4, 6.9, 1.3 Hz, 1H), 7.62 – 7.50 (m, 3H), 7.50 – 7.39 (m, 2H), 5.65 (s, 2H). <sup>13</sup>C NMR (126 MHz, CDCl<sub>3</sub>) δ 166.30 (s), 156.41 (s), 147.69 (s), 137.05 (s), 133.25 (s), 130.20 (s), 129.86 (s), 129.20 (s), 128.48 (s), 127.62 (d, *J* = 6.0 Hz), 126.71 (s), 119.40 (s), 67.90 (s).

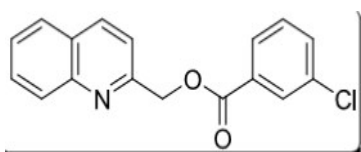

(3b) quinolin-2-ylmethyl 3-chlorobenzoate: C<sub>17</sub>H<sub>12</sub>ClNO<sub>2</sub> (White

solid). <sup>1</sup>H NMR (500 MHz, CDCl<sub>3</sub>) δ 8.19 (d, *J* = 7.8 Hz, 1H), 8.09 (d, *J* = 8.5 Hz, 2H), 8.01 (d, *J* = 7.3 Hz, 1H), 7.82 (d, *J* = 7.4 Hz, 1H), 7.72 (d, *J* = 7.0 Hz, 1H), 7.56 (t, *J* = 14.5 Hz, 3H), 7.39 (t, *J* = 6.1 Hz, 1H), 5.65 (s, 2H). <sup>13</sup>C NMR (126 MHz, CDCl<sub>3</sub>) δ 165.11 (s), 155.92 (s), 147.72 (s), 137.13 (s), 134.66 (s), 133.79 (s), 133.28 (s), 131.62 (s), 130.12 – 129.73 (m), 129.24 (s), 128.00 (s), 127.67 (s), 126.81 (s), 119.44 (s), 68.25 (s).

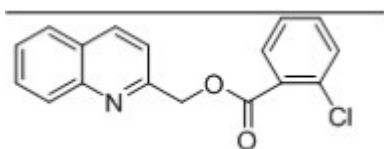

**(3c)** quinolin-2-ylmethyl 2-chlorobenzoate:

$C_{17}H_{12}ClNO_2$  (Yellow solid).  $^1H$  NMR (500 MHz,  $CDCl_3$ )  $\delta$  8.09 (d,  $J = 8.2$  Hz, 1H), 8.04 – 7.86 (m, 2H), 7.71 (d,  $J = 7.7$  Hz, 1H), 7.62 (t,  $J = 7.0$  Hz, 1H), 7.52 (d,  $J = 8.3$  Hz, 1H), 7.44 (s, 2H), 7.20 – 6.98 (m, 2H), 5.57 (s, 2H).  $^{13}C$  NMR (126 MHz,  $CDCl_3$ )  $\delta$  165.32 (s), 155.92 (s), 137.08 (s), 134.02 (s), 132.84 (s), 131.77 (s), 131.20 (s), 129.83 (d,  $J = 17.7$  Hz), 129.21 (s), 127.64 (d,  $J = 5.2$  Hz), 126.72 (d,  $J = 11.0$  Hz), 119.55 (s), 68.36 (s).

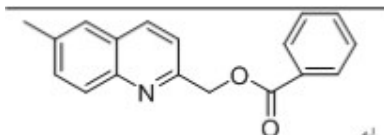

**(3d)** (6-methylquinolin-2-yl)methyl benzoate:

$C_{18}H_{15}NO_2$  (Yellow solid).  $^1H$  NMR (500 MHz,  $CDCl_3$ )  $\delta$  8.14 (d,  $J = 6.7$  Hz, 2H), 8.08 (t,  $J = 10.3$  Hz, 1H), 7.99 (d,  $J = 7.9$  Hz, 1H), 7.53 (dd,  $J = 25.7, 16.2$  Hz, 4H), 7.46 (d,  $J = 6.6$  Hz, 2H), 5.64 (s, 2H), 2.53 (s, 3H).  $^{13}C$  NMR (126 MHz,  $CDCl_3$ )  $\delta$  166.31 (s), 155.40 (s), 146.27 (s), 136.62 (s), 136.38 (s), 133.22 (s), 132.17 (s), 129.90 (d,  $J = 8.9$  Hz), 128.83 (s), 128.47 (s), 127.65 (s), 126.49 (s), 119.48 (s), 67.95 (s), 21.58 (s).

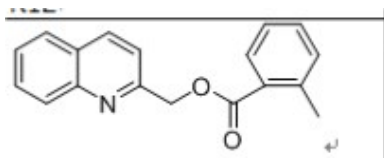

**(3e)** quinolin-2-ylmethyl 2-methylbenzoate: Yellow liquid. IR (KBr): 1722, 1606, 1580, 1509  $cm^{-1}$ .  $^1H$  NMR (500 MHz,  $CDCl_3$ )  $\delta$  8.12 (d,  $J = 7.6$  Hz, 1H), 8.02 (t,  $J = 8.3$  Hz, 1H), 7.98 (d,  $J = 5.7$  Hz, 1H), 7.76 (d,  $J = 7.4$  Hz, 1H), 7.66 (s, 1H), 7.49 (d,  $J = 6.6$  Hz, 2H), 7.35 (s, 1H), 7.19 (s, 3H), 5.56 (s, 2H), 2.57 (s, 3H).  $^{13}C$  NMR (126 MHz,  $CDCl_3$ )  $\delta$  167.10 (s), 156.52 (s), 147.65 (s), 140.68 (s), 137.07 (s), 132.30 (s), 131.81 (s), 130.85 (s), 129.89 (s), 129.16 (d,  $J = 2.1$  Hz), 127.61 (d,  $J = 9.5$  Hz), 126.70 (s), 125.81 (s), 119.42 (s), 67.67 (s), 21.88 (s). HRMS (ESI)  $m/z$  calcd for  $C_{18}H_{15}NO_2$   $[M+H]^+$  278.11740, found 278.11756.

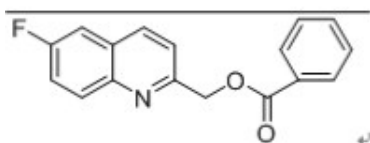

**(3f)** (6-fluoroquinolin-2-yl)methyl benzoate:

$C_{17}H_{12}FNO_2$  (Yellow solid).  $^1H$  NMR (500 MHz,  $CDCl_3$ )  $\delta$  8.20 – 8.01 (m, 4H), 7.57 (d,  $J = 4.6$  Hz, 2H), 7.45 (dt,  $J = 25.5, 12.9$  Hz, 4H), 5.64 (s, 2H).  $^{13}C$  NMR (126 MHz,  $CDCl_3$ )  $\delta$  166.25 (s), 161.52 (s), 159.54 (s), 155.80 (d,  $J = 2.7$  Hz), 144.76 (s), 136.35 (d,  $J = 5.4$  Hz), 133.29 (s), 131.72 (d,  $J = 9.1$  Hz), 129.83 (d,  $J = 5.0$  Hz), 128.50 (s), 128.17 (d,  $J = 10.1$  Hz), 120.18 (d,  $J = 3.8$  Hz), 119.96 (s), 110.73 (s), 110.63 (d,  $J = 21.7$  Hz).

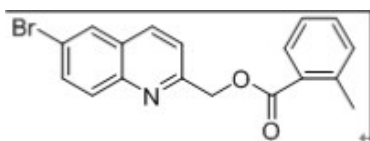

**(3g)** (6-bromoquinolin-2-yl)methyl 2-methylbenzoate :

White solid. mp **110.1–111.5**  $^{\circ}C$ ; IR (KBr): 715, 1592, 1491, 1457  $cm^{-1}$ .  $^1H$  NMR (500

MHz, CDCl<sub>3</sub>)  $\delta$  8.01 (d,  $J$  = 8.5 Hz, 1H), 7.98 – 7.93 (m, 1H), 7.88 (dd,  $J$  = 12.8, 5.5 Hz, 2H), 7.70 (dd,  $J$  = 9.0, 2.1 Hz, 1H), 7.49 (d,  $J$  = 8.5 Hz, 1H), 7.35 (td,  $J$  = 7.5, 1.1 Hz, 1H), 7.18 (dd,  $J$  = 7.9, 4.4 Hz, 2H), 5.52 (s, 2H), 2.56 (s, 3H). <sup>13</sup>C NMR (126 MHz, CDCl<sub>3</sub>)  $\delta$  167.02 (s), 157.05 (s), 146.24 (s), 140.72 (s), 135.98 (s), 133.31 (s), 132.38 (s), 131.85 (s), 130.88 (d,  $J$  = 14.5 Hz), 129.67 (s), 129.01 (s), 128.62 (s), 125.83 (s), 120.55 (s), 120.20 (s), 67.45 (s), 21.88 (s). HRMS (ESI)  $m/z$  calcd for C<sub>18</sub>H<sub>14</sub>BrNO<sub>2</sub> [M+H]<sup>+</sup> 356.02756, found 356.02807.

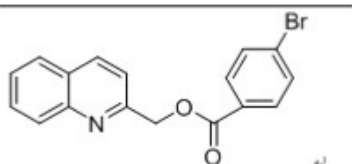

**(3h)** quinolin-2-ylmethyl 4-bromobenzoate: White solid.

mp 143.1-144.5 °C; IR (KBr): 1721, 1590, 1506, 1448 cm<sup>-1</sup>. <sup>1</sup>H NMR (500 MHz, CDCl<sub>3</sub>)  $\delta$  8.21 (d,  $J$  = 8.5 Hz, 1H), 8.10 (d,  $J$  = 8.5 Hz, 1H), 8.04 – 7.95 (m, 2H), 7.84 (d,  $J$  = 7.7 Hz, 1H), 7.74 (ddd,  $J$  = 8.4, 6.9, 1.4 Hz, 1H), 7.64 – 7.59 (m, 2H), 7.56 (ddd,  $J$  = 8.5, 6.1, 2.1 Hz, 2H), 5.65 (s, 2H). <sup>13</sup>C NMR (126 MHz, CDCl<sub>3</sub>)  $\delta$  165.61 (s), 156.02 (s), 147.70 (s), 137.12 (s), 131.86 (s), 131.38 (s), 129.96 (s), 129.23 (s), 128.75 (s), 128.45 (s), 127.64 (d,  $J$  = 6.7 Hz), 126.81 (s), 119.46 (s), 68.14 (s). HRMS (ESI)  $m/z$  calcd for C<sub>17</sub>H<sub>12</sub>BrNO<sub>2</sub> [M+H]<sup>+</sup> 342.01208, found 342.01242.

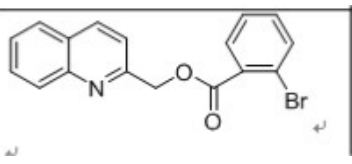

**(3i)** quinolin-2-ylmethyl 2-bromobenzoate: White solid.

mp 88.5-89.8 °C; IR (KBr): 1729, 1618, 1588, 1505 cm<sup>-1</sup>. <sup>1</sup>H NMR (500 MHz, CDCl<sub>3</sub>)  $\delta$  8.12 (d,  $J$  = 7.5 Hz, 1H), 8.02 (d,  $J$  = 7.6 Hz, 1H), 7.85 (d,  $J$  = 5.1 Hz, 1H), 7.75 (d,  $J$  = 7.0 Hz, 1H), 7.71 – 7.57 (m, 2H), 7.53 (d,  $J$  = 7.7 Hz, 1H), 7.47 (s, 1H), 7.36 – 7.21 (m, 2H), 5.59 (s, 2H). <sup>13</sup>C NMR (126 MHz, CDCl<sub>3</sub>)  $\delta$  165.78 (s), 155.83 (s), 147.67 (s), 137.06 (s), 134.48 (s), 132.84 (s), 131.73 (d,  $J$  = 11.5 Hz), 129.90 (s), 129.22 (s), 127.63 (d,  $J$  = 5.7 Hz), 127.25 (s), 126.77 (s), 121.97 (s), 119.61 (s), 68.42 (s). HRMS (ESI)  $m/z$  calcd for C<sub>17</sub>H<sub>12</sub>BrNO<sub>2</sub> [M+H]<sup>+</sup> 342.01210, found 342.01242.

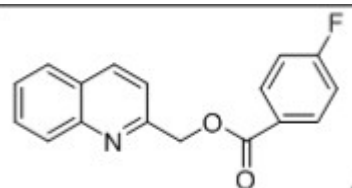

**(3j)** quinolin-2-ylmethyl 4-fluorobenzoate :

C<sub>17</sub>H<sub>12</sub>FNO<sub>2</sub> (White solid). <sup>1</sup>H NMR (500 MHz, CDCl<sub>3</sub>)  $\delta$  8.22 – 8.13 (m, 3H), 8.09 (d,  $J$  = 8.2 Hz, 1H), 7.89 – 7.77 (m, 1H), 7.73 (t,  $J$  = 7.1 Hz, 1H), 7.57 (dd,  $J$  = 22.3, 7.7 Hz, 2H), 7.12 (t,  $J$  = 7.6 Hz, 2H), 5.64 (s, 2H). <sup>13</sup>C NMR (126 MHz, CDCl<sub>3</sub>)  $\delta$  166.97 (s), 165.33 (s), 164.95 (s), 156.18 (s), 147.70 (s), 137.08 (s), 132.44 (d,  $J$  = 9.4 Hz), 129.92 (s), 129.21 (s), 127.63 (d,  $J$  = 6.4 Hz), 126.77 (s), 119.43 (s), 115.74 (s), 115.57 (s), 68.01 (s).

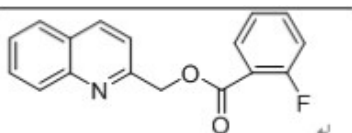

**(3k)** quinolin-2-ylmethyl 2-fluorobenzoate: Yellow solid.

mp 51.2-52.1 °C; IR (KBr): 1735, 1613, 1581, 1490 cm<sup>-1</sup>. <sup>1</sup>H NMR (500 MHz, CDCl<sub>3</sub>)  $\delta$  8.14 (d,  $J$  = 7.9 Hz, 1H), 8.02 (d,  $J$  = 7.8 Hz, 1H), 7.97 (s, 1H), 7.76 (d,  $J$  = 7.0 Hz, 1H), 7.66 (s, 1H), 7.56 (d,  $J$  = 8.2 Hz, 1H), 7.48 (s, 2H), 7.23 – 7.13 (m, 1H), 7.10 (t,  $J$  = 9.0 Hz, 1H), 5.60 (s, 2H). <sup>13</sup>C

NMR (126 MHz, CDCl<sub>3</sub>)  $\delta$  163.03 (d,  $J$  = 3.6 Hz), 162.15 (s), 160.08 (s), 155.12 (s), 146.58 (s), 136.08 (s), 133.80 (d,  $J$  = 9.0 Hz), 131.35 (s), 128.84 (s), 128.09 (s), 126.59 (d,  $J$  = 8.9 Hz), 125.66 (s), 123.06 (d,  $J$  = 3.9 Hz), 118.28 (s), 117.34 (d,  $J$  = 9.7 Hz), 116.14 (s), 115.96 (s), 67.05 (s).

HRMS (ESI)  $m/z$  calcd for C<sub>17</sub>H<sub>12</sub>FNO<sub>2</sub> [M+H]<sup>+</sup> **282.09233**, found **282.09248**.

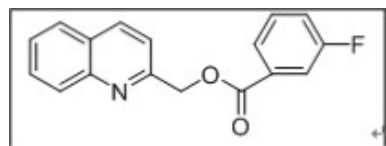

**(3l)** quinolin-2-ylmethyl 3-fluorobenzoate: White solid.

mp **56.4-57.5** °C; IR (KBr): 1794, 1594, 1508, 1487 cm<sup>-1</sup>. <sup>1</sup>H NMR (500 MHz, CDCl<sub>3</sub>)  $\delta$  8.05 (d,  $J$  = 8.1 Hz, 1H), 7.98 (d,  $J$  = 7.9 Hz, 1H), 7.80 (d,  $J$  = 6.3 Hz, 1H), 7.68 (d,  $J$  = 6.4 Hz, 2H), 7.60 (s, 1H), 7.42 (d,  $J$  = 7.9 Hz, 2H), 7.35 – 7.24 (m, 1H), 7.15 (d,  $J$  = 6.7 Hz, 1H), 5.54 (s, 2H). <sup>13</sup>C NMR (126 MHz, CDCl<sub>3</sub>)  $\delta$  165.14 (d,  $J$  = 3.0 Hz), 163.54 (s), 161.58 (s), 155.95 (s), 147.66 (s), 137.11 (s), 131.98 (d,  $J$  = 7.5 Hz), 130.15 (d,  $J$  = 7.7 Hz), 129.92 (s), 129.18 (s), 127.63 (d,  $J$  = 10.2 Hz), 126.78 (s), 125.60 (d,  $J$  = 3.0 Hz), 120.41 (s), 120.24 (s), 119.37 (s), 116.80 (s), 116.62 (s), 68.18 (s).

HRMS (ESI)  $m/z$  calcd for C<sub>17</sub>H<sub>12</sub>FNO<sub>2</sub> [M+H]<sup>+</sup> **282.09238**, found **282.09248**.

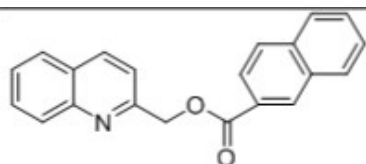

**(3m)** quinolin-2-ylmethyl 2-naphthoate: C<sub>21</sub>H<sub>15</sub>NO<sub>2</sub>

(White solid). <sup>1</sup>H NMR (500 MHz, CDCl<sub>3</sub>)  $\delta$  8.63 (s, 1H), 8.12 (d,  $J$  = 8.0 Hz, 1H), 8.09 – 7.98 (m, 2H), 7.87 (d,  $J$  = 7.6 Hz, 1H), 7.80 (t,  $J$  = 8.2 Hz, 2H), 7.74 (d,  $J$  = 7.6 Hz, 1H), 7.64 (d,  $J$  = 6.8 Hz, 1H), 7.58 – 7.40 (m, 4H), 5.64 (s, 2H). <sup>13</sup>C NMR (126 MHz, CDCl<sub>3</sub>)  $\delta$  166.47 (s), 156.45 (s), 147.73 (s), 137.10 (s), 135.71 (s), 132.54 (s), 131.48 (s), 129.90 (s), 129.44 (s), 129.24 (s), 128.37 (d,  $J$  = 16.8 Hz), 127.94 – 127.56 (m), 127.10 (s), 126.74 (s), 125.37 (s), 119.52 (s), 68.04 (s).

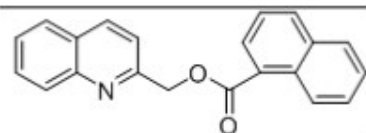

**(3n)** quinolin-2-ylmethyl 1-naphthoate: White solid. mp

74.8-75.6 °C; IR (KBr): 1720, 1576, 1508, 1446 cm<sup>-1</sup>. <sup>1</sup>H NMR (500 MHz, CDCl<sub>3</sub>)  $\delta$  9.02 (d,  $J$  = 8.2 Hz, 1H), 8.34 (d,  $J$  = 5.5 Hz, 1H), 8.18 (d,  $J$  = 7.8 Hz, 1H), 8.12 (d,  $J$  = 8.0 Hz, 1H), 8.03 (d,  $J$  = 7.1 Hz, 1H), 7.88 (d,  $J$  = 7.4 Hz, 1H), 7.82 (d,  $J$  = 7.3 Hz, 1H), 7.73 (s, 1H), 7.60 (d,  $J$  = 8.2 Hz, 2H), 7.58 – 7.40 (m, 3H), 5.75 (s, 2H). <sup>13</sup>C NMR (126 MHz, CDCl<sub>3</sub>)  $\delta$  166.14 (s), 155.50 (s), 146.78 (s), 136.13 (s), 132.95 (s), 132.79 (s), 130.60 (s), 129.66 (s), 128.94 (s), 128.27 (s), 127.64 (s), 126.99 (s), 126.68 (d,  $J$  = 6.8 Hz), 125.74 (d,  $J$  = 5.0 Hz), 125.37 (s), 124.95 (s), 123.58 (s), 118.48 (s), 66.94 (s).

HRMS (ESI)  $m/z$  calcd for C<sub>21</sub>H<sub>15</sub>NO<sub>2</sub> [M+H]<sup>+</sup> 314.11725, found 314.11756.

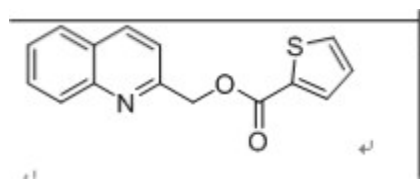

**(3o)** quinolin-2-ylmethyl thiophene-2-carboxylate:

C<sub>15</sub>H<sub>11</sub>NO<sub>2</sub>S (White solid). <sup>1</sup>H NMR (500 MHz, CDCl<sub>3</sub>)  $\delta$  8.20 (d,  $J$  = 7.9 Hz, 1H), 8.09 (d,  $J$  = 8.0 Hz, 1H), 7.90 (s, 1H), 7.83 (d,  $J$  = 7.4 Hz, 1H), 7.73 (d,  $J$  = 6.5 Hz, 1H), 7.64 – 7.50 (m, 3H), 7.13 (d,  $J$  = 3.3 Hz, 1H), 5.63 (s, 2H). <sup>13</sup>C NMR (126 MHz, CDCl<sub>3</sub>)  $\delta$  161.89 (s), 156.20 (s), 147.64 (s),

137.10 (s), 134.02 (s), 133.27 (s), 132.87 (s), 129.89 (s), 129.17 (s), 127.90 (s), 127.63 (d,  $J = 5.2$  Hz), 126.73 (s), 119.33 (s), 67.86 (s).

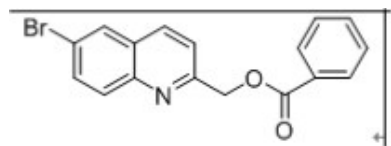

**(3p)** (6-bromoquinolin-2-yl)methyl benzoate:

$C_{17}H_{12}BrNO_2$  (Yellow solid).  $^1H$  NMR (500 MHz,  $CDCl_3$ )  $\delta$  8.12 (dd,  $J = 14.8, 7.3$  Hz, 3H), 8.02 – 7.92 (m, 2H), 7.80 (d,  $J = 8.6$  Hz, 1H), 7.59 (d,  $J = 6.2$  Hz, 2H), 7.47 (s, 2H), 5.64 (s, 2H).  $^{13}C$  NMR (126 MHz,  $CDCl_3$ )  $\delta$  166.25 (s), 156.96 (s), 146.27 (s), 136.01 (s), 133.34 (s), 130.96 (s), 130.21 (s), 129.87 (s), 129.68 (s), 128.59 (d,  $J = 18.6$  Hz), 120.60 (s), 120.22 (s), 67.66 (s).

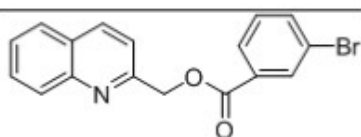

**(3q)** quinolin-2-ylmethyl 3-bromobenzoate:

$C_{17}H_{12}BrNO_2$  (White solid).  $^1H$  NMR (500 MHz,  $CDCl_3$ )  $\delta$  8.26 (s, 1H), 8.18 (d,  $J = 7.9$  Hz, 1H), 8.07 (dd,  $J = 20.8, 7.6$  Hz, 2H), 7.83 (t,  $J = 13.6$  Hz, 1H), 7.76 – 7.64 (m, 2H), 7.53 (d,  $J = 7.0$  Hz, 2H), 7.31 (dd,  $J = 17.5, 10.2$  Hz, 1H), 5.65 (s, 2H).  $^{13}C$  NMR (126 MHz,  $CDCl_3$ )  $\delta$  164.97 (s), 155.90 (s), 147.72 (s), 137.11 (s), 136.19 (s), 132.81 (s), 131.81 (s), 129.99 (d,  $J = 15.6$  Hz), 129.25 (s), 128.44 (s), 127.64 (d,  $J = 5.9$  Hz), 126.80 (s), 122.58 (s), 119.44 (s), 68.26 (s).

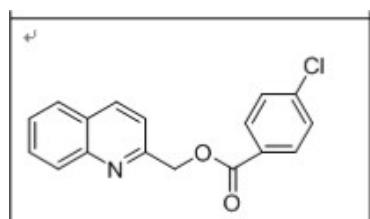

**(3r)** quinolin-2-ylmethyl 4-chlorobenzoate:  $C_{17}H_{12}ClNO_2$

(White solid).  $^1H$  NMR (500 MHz,  $CDCl_3$ )  $\delta$  8.12 (d,  $J = 8.0$  Hz, 1H), 8.07 – 7.92 (m, 3H), 7.75 (d,  $J = 7.4$  Hz, 1H), 7.66 (s, 1H), 7.47 (d,  $J = 7.7$  Hz, 2H), 7.36 (d,  $J = 7.4$  Hz, 2H), 5.57 (s, 2H).  $^{13}C$  NMR (126 MHz,  $CDCl_3$ )  $\delta$  165.46 (s), 156.06 (s), 139.76 (s), 131.25 (s), 129.94 (s), 129.23 (s), 128.85 (s), 128.33 (s), 127.63 (d,  $J = 4.8$  Hz), 126.80 (s), 119.44 (s), 68.11 (s).

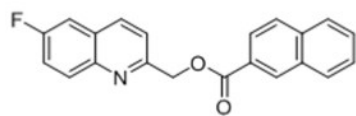

**(3s)** (6-fluoroquinolin-2-yl)methyl 2-naphthoate: White

solid. mp **133.5-134.8** °C; IR (KBr): 1716, 1605, 1507, 1469  $cm^{-1}$ .  $^1H$  NMR (500 MHz,  $CDCl_3$ )  $\delta$  8.71 (s, 1H), 8.22 – 8.01 (m, 3H), 7.96 (d,  $J = 8.1$  Hz, 1H), 7.89 (t,  $J = 8.2$  Hz, 2H), 7.69 – 7.37 (m, 5H), 5.70 (s, 2H).  $^{13}C$  NMR (126 MHz,  $CDCl_3$ )  $\delta$  166.46 (s), 161.55 (s), 159.57 (s), 155.82 (d,  $J = 2.8$  Hz), 144.79 (s), 136.44 (d,  $J = 5.4$  Hz), 135.70 (s), 132.50 (s), 131.75 (d,  $J = 9.2$  Hz), 131.49 (s), 129.43 (s), 128.31 (dd,  $J = 23.5, 14.7$  Hz), 127.82 (s), 126.98 (s), 126.78 (s), 125.32 (s), 120.28 (d,  $J = 13.0$  Hz), 120.03 (s), 110.75 (s), 110.58 (s), 67.86 (s). HRMS (ESI)  $m/z$  calcd for  $C_{21}H_{14}FNO_2$  [M+H]<sup>+</sup> **332.10776**, found **332.10813**.

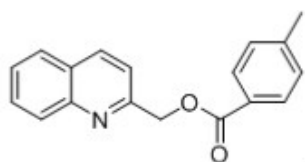

**(3t)** quinolin-2-ylmethyl 4-methylbenzoate:  $C_{18}H_{15}NO_2$   
(White solid).  $^1H$  NMR (500 MHz,  $CDCl_3$ )  $\delta$  8.13 (t,  $J$  = 17.6 Hz, 1H), 8.02 (d,  $J$  = 8.2 Hz, 1H), 7.95 (d,  $J$  = 7.1 Hz, 2H), 7.74 (d,  $J$  = 7.7 Hz, 1H), 7.65 (t,  $J$  = 6.6 Hz, 1H), 7.48 (dd,  $J$  = 14.1, 7.6 Hz, 2H), 7.18 (d,  $J$  = 5.0 Hz, 2H), 5.57 (s, 2H), 2.34 (s, 3H).  $^{13}C$  NMR (126 MHz,  $CDCl_3$ )  $\delta$  166.36 (s), 156.60 (s), 147.68 (s), 143.99 (s), 137.02 (s), 129.88 (d,  $J$  = 7.9 Hz), 129.20 (s), 127.62 (d,  $J$  = 6.1 Hz), 127.14 (s), 126.67 (s), 119.40 (s), 67.73 (s), 21.70 (s).

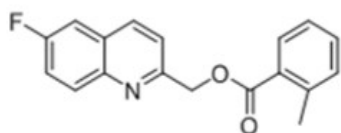

**(3u)** (6-fluoroquinolin-2-yl)methyl 2-methylbenzoate:

Yellow solid. mp **73.8-75.2** °C; IR (KBr): 1716, 1604, 1510, 1456  $cm^{-1}$ .  $^1H$  NMR (500 MHz,  $CDCl_3$ )  $\delta$  8.13 (d,  $J$  = 8.5 Hz, 1H), 8.11 – 8.03 (m, 2H), 7.58 (d,  $J$  = 8.5 Hz, 1H), 7.49 (td,  $J$  = 8.8, 2.8 Hz, 1H), 7.47 – 7.39 (m, 2H), 7.26 (t,  $J$  = 6.9 Hz, 2H), 5.61 (s, 2H), 2.64 (s, 3H).  $^{13}C$  NMR (126 MHz,  $CDCl_3$ )  $\delta$  167.07 (s), 161.51 (s), 159.54 (s), 155.89 (d,  $J$  = 2.8 Hz), 144.76 (s), 140.69 (s), 136.35 (d,  $J$  = 5.3 Hz), 132.34 (s), 131.95 – 131.60 (m), 130.83 (s), 129.07 (s), 128.15 (d,  $J$  = 10.2 Hz), 125.82 (s), 120.20 (d,  $J$  = 4.5 Hz), 119.97 (s), 110.73 (s), 110.56 (s), 77.32 (s), 77.06 (s), 76.81 (s), 67.52 (s), 21.87 (s). HRMS (ESI)  $m/z$  calcd for  $C_{18}H_{14}FNO_2$   $[M+H]^+$  **296.10792**, found **296.10813**.

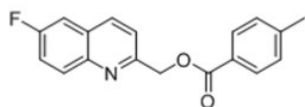

**(3v)** (6-fluoroquinolin-2-yl)methyl 4-methylbenzoate:

White solid. mp **94.2-95.8** °C; IR (KBr): 1720, 1610, 1509, 1449  $cm^{-1}$ .  $^1H$  NMR (500 MHz,  $CDCl_3$ )  $\delta$  8.13 (d,  $J$  = 8.5 Hz, 1H), 8.08 (dd,  $J$  = 9.2, 5.3 Hz, 1H), 8.02 (d,  $J$  = 8.2 Hz, 2H), 7.58 (d,  $J$  = 8.5 Hz, 1H), 7.49 (td,  $J$  = 8.8, 2.8 Hz, 1H), 7.43 (dd,  $J$  = 8.8, 2.7 Hz, 1H), 7.31 – 7.24 (m, 2H), 5.62 (s, 2H), 2.42 (s, 3H).  $^{13}C$  NMR (126 MHz,  $CDCl_3$ )  $\delta$  166.34 (s), 161.51 (s), 159.53 (s), 155.97 (d,  $J$  = 2.8 Hz), 144.74 (s), 144.07 (s), 136.35 (d,  $J$  = 5.4 Hz), 131.70 (d,  $J$  = 9.2 Hz), 130.24 (s), 129.90 (s), 129.22 (s), 128.16 (d,  $J$  = 10.0 Hz), 127.03 (s), 120.19 (d,  $J$  = 5.8 Hz), 119.97 (s), 110.72 (s), 110.55 (s), 67.57 (s), 21.72 (s). HRMS (ESI)  $m/z$  calcd for  $C_{18}H_{14}FNO_2$   $[M+H]^+$  **296.10803**, found **296.10813**.

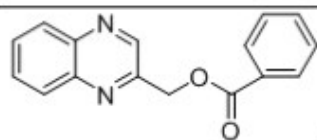

**(3w)** quinoxalin-2-ylmethyl benzoate:  $C_{16}H_{12}N_2O_2$

(Yellow solid).  $^1H$  NMR (500 MHz,  $CDCl_3$ )  $\delta$  9.05 (s, 1H), 8.12 (dd,  $J$  = 11.4, 6.8 Hz, 4H), 7.79 (d,  $J$  = 4.2 Hz, 2H), 7.59 (s, 1H), 7.47 (s, 2H), 5.70 (s, 2H).  $^{13}C$  NMR (126 MHz,  $CDCl_3$ )  $\delta$  166.16 (s), 151.03 (s), 144.21 (s), 142.22 (s), 141.84 (s), 133.45 (s), 130.45 (s), 130.16 (s), 129.89 (s), 129.54 – 129.22 (m), 128.55 (s), 66.03 (s).

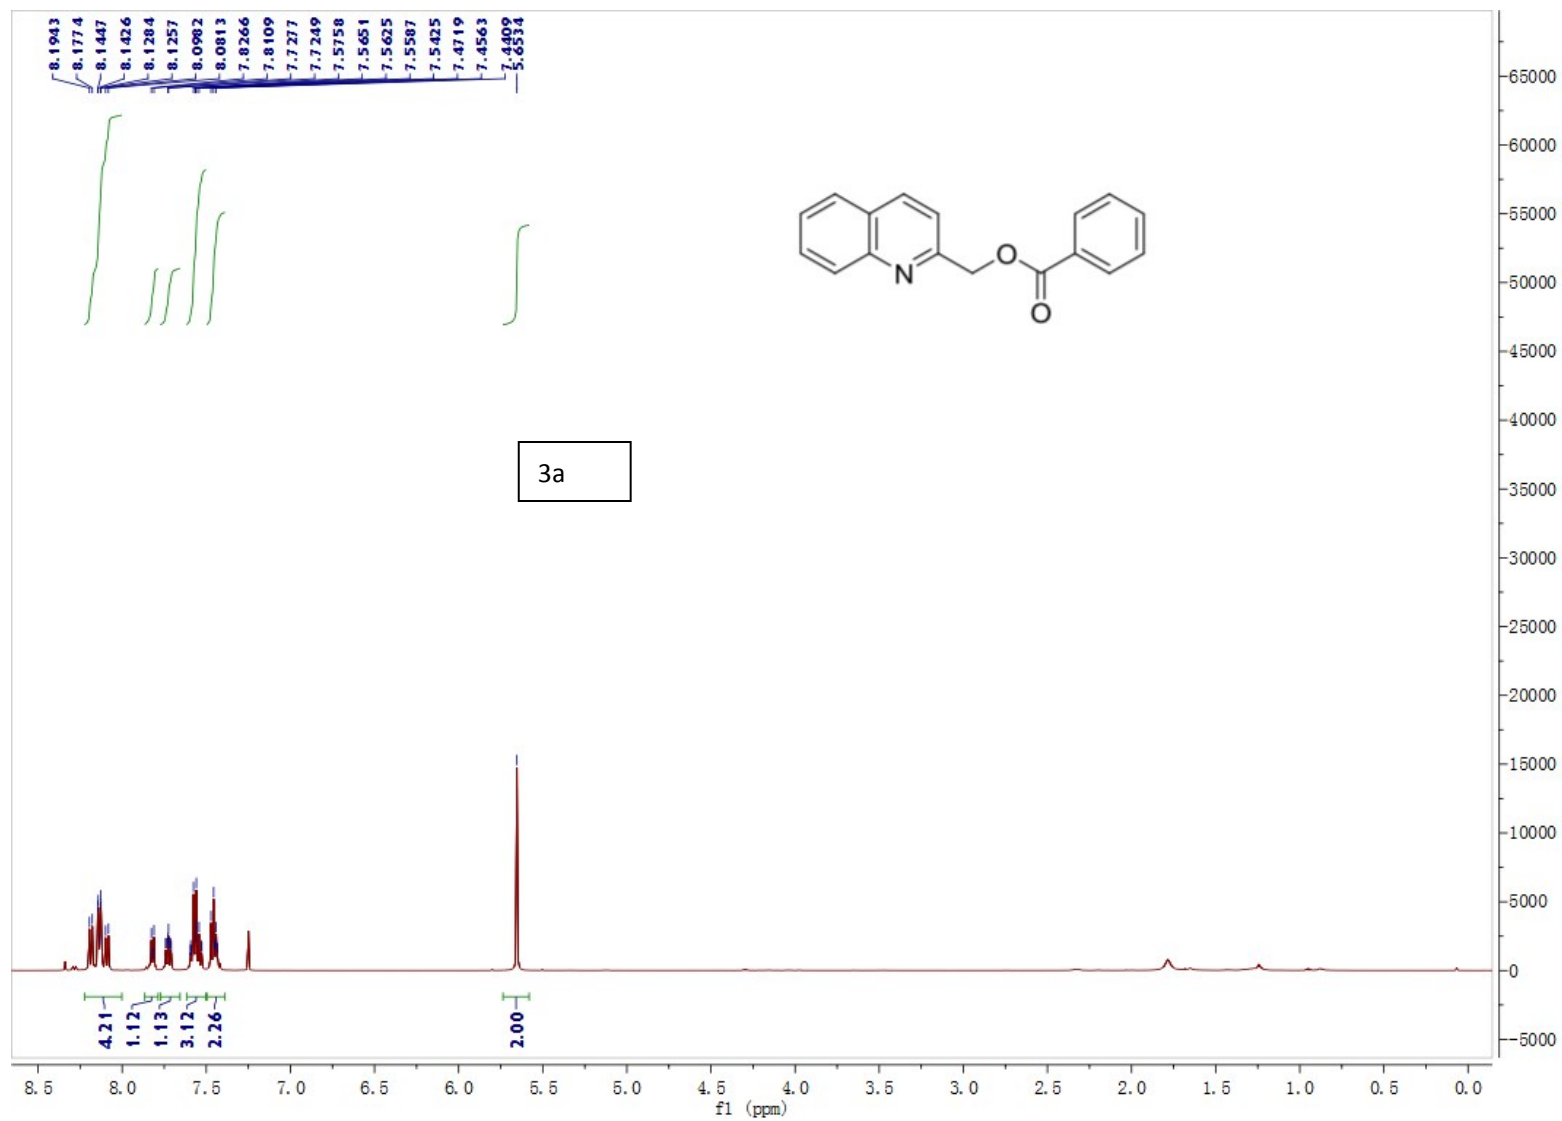

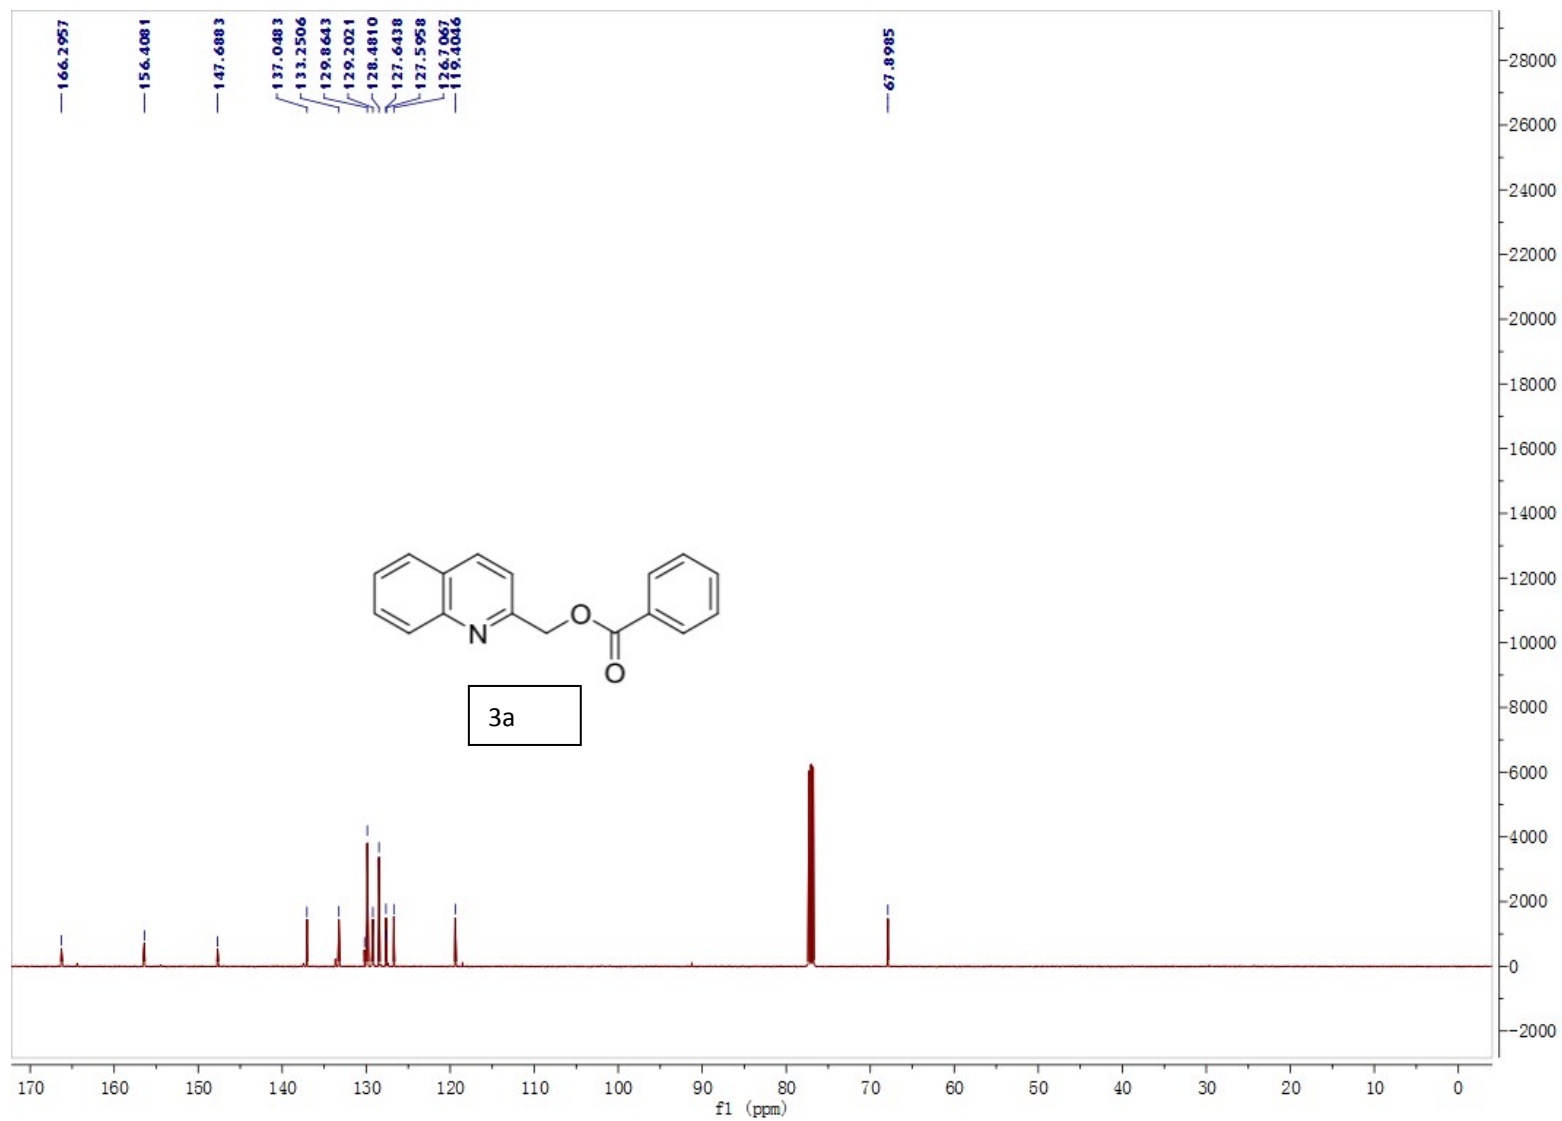



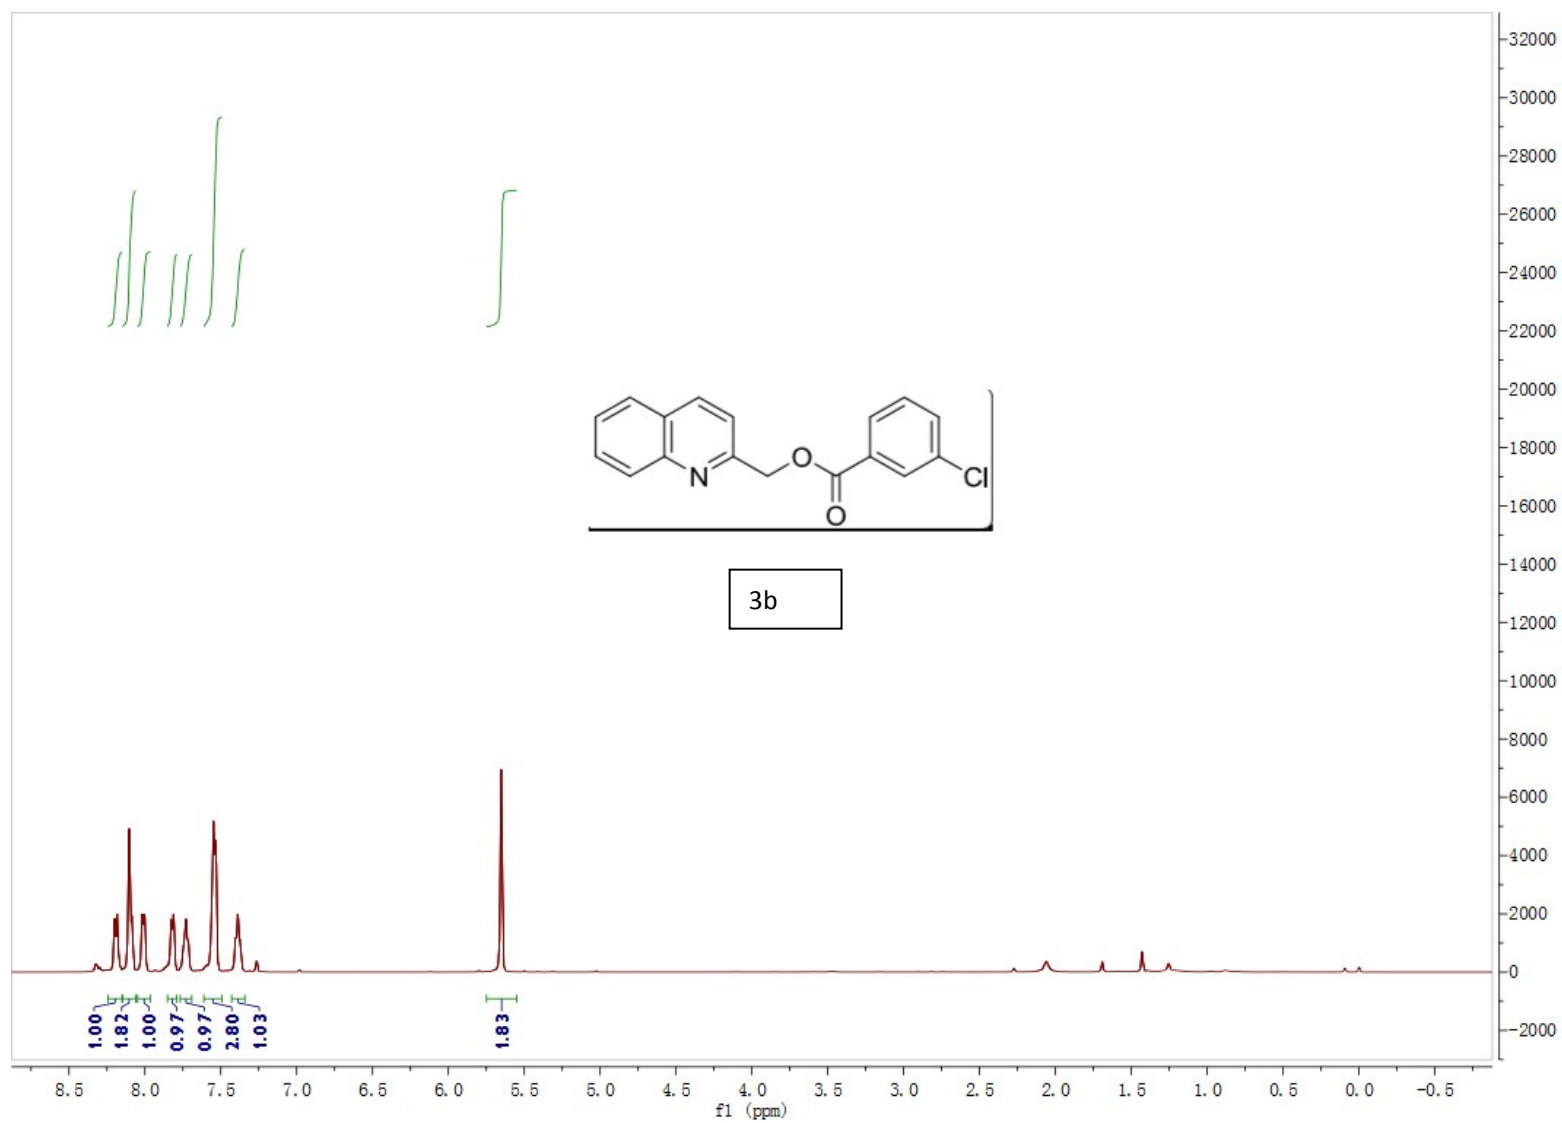

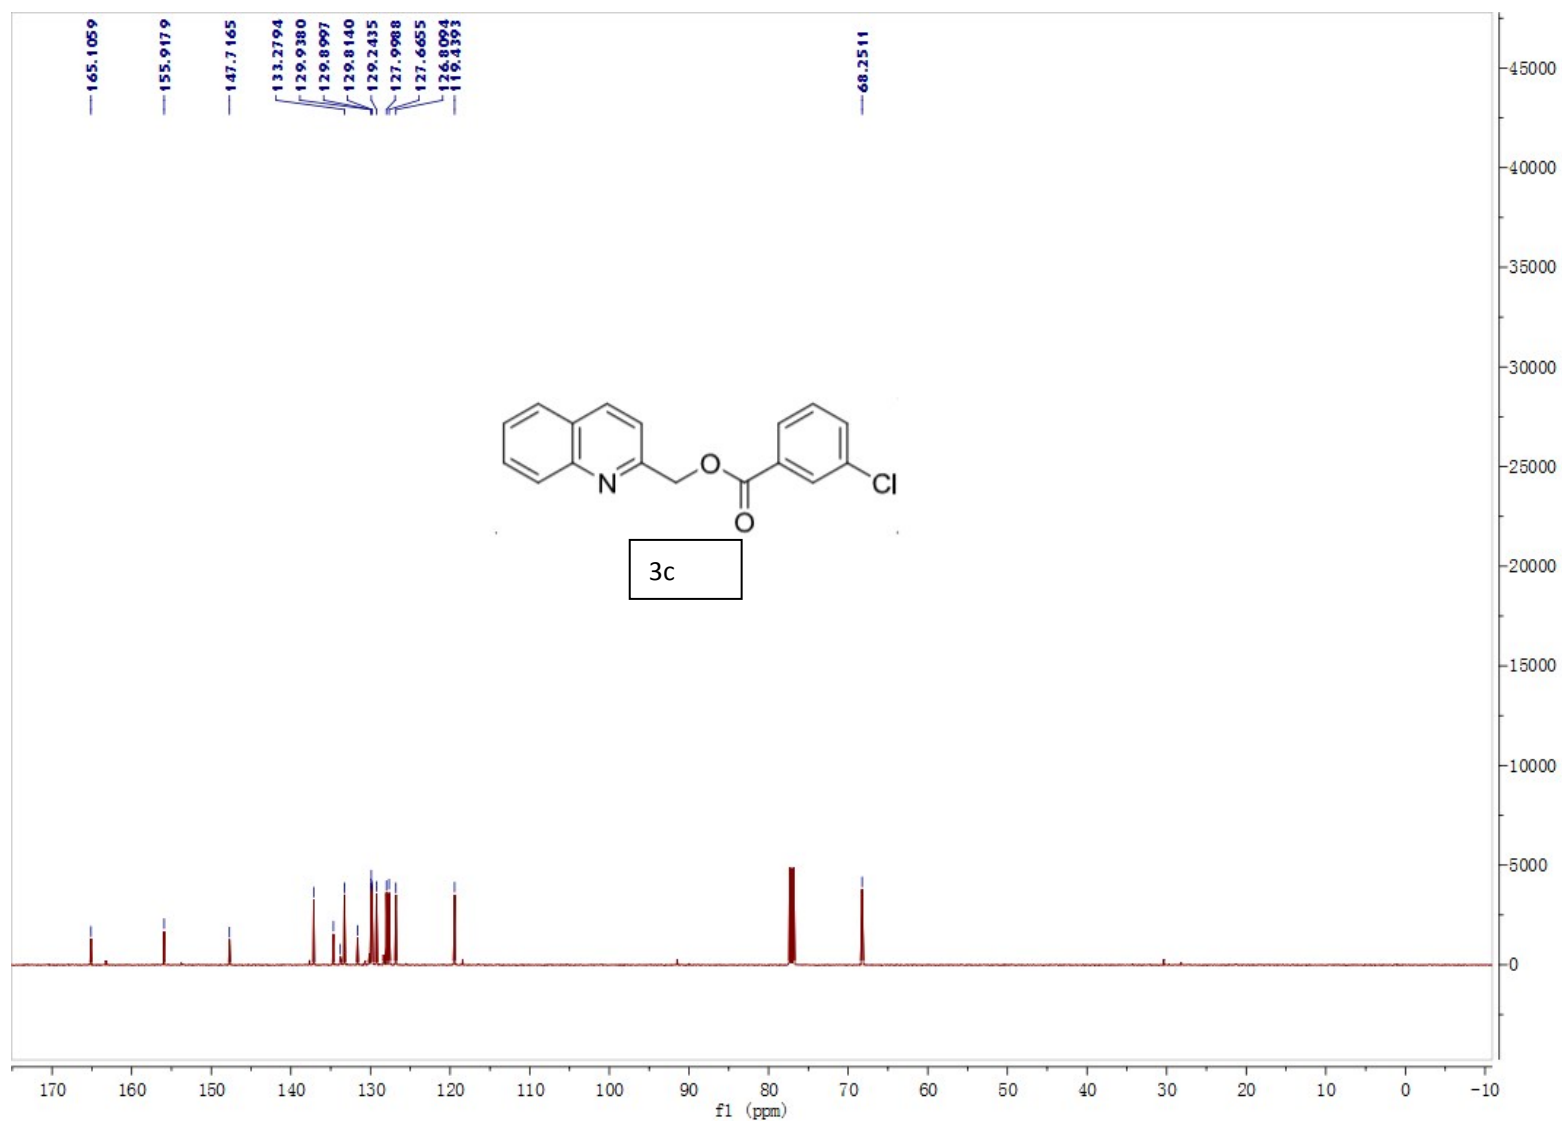

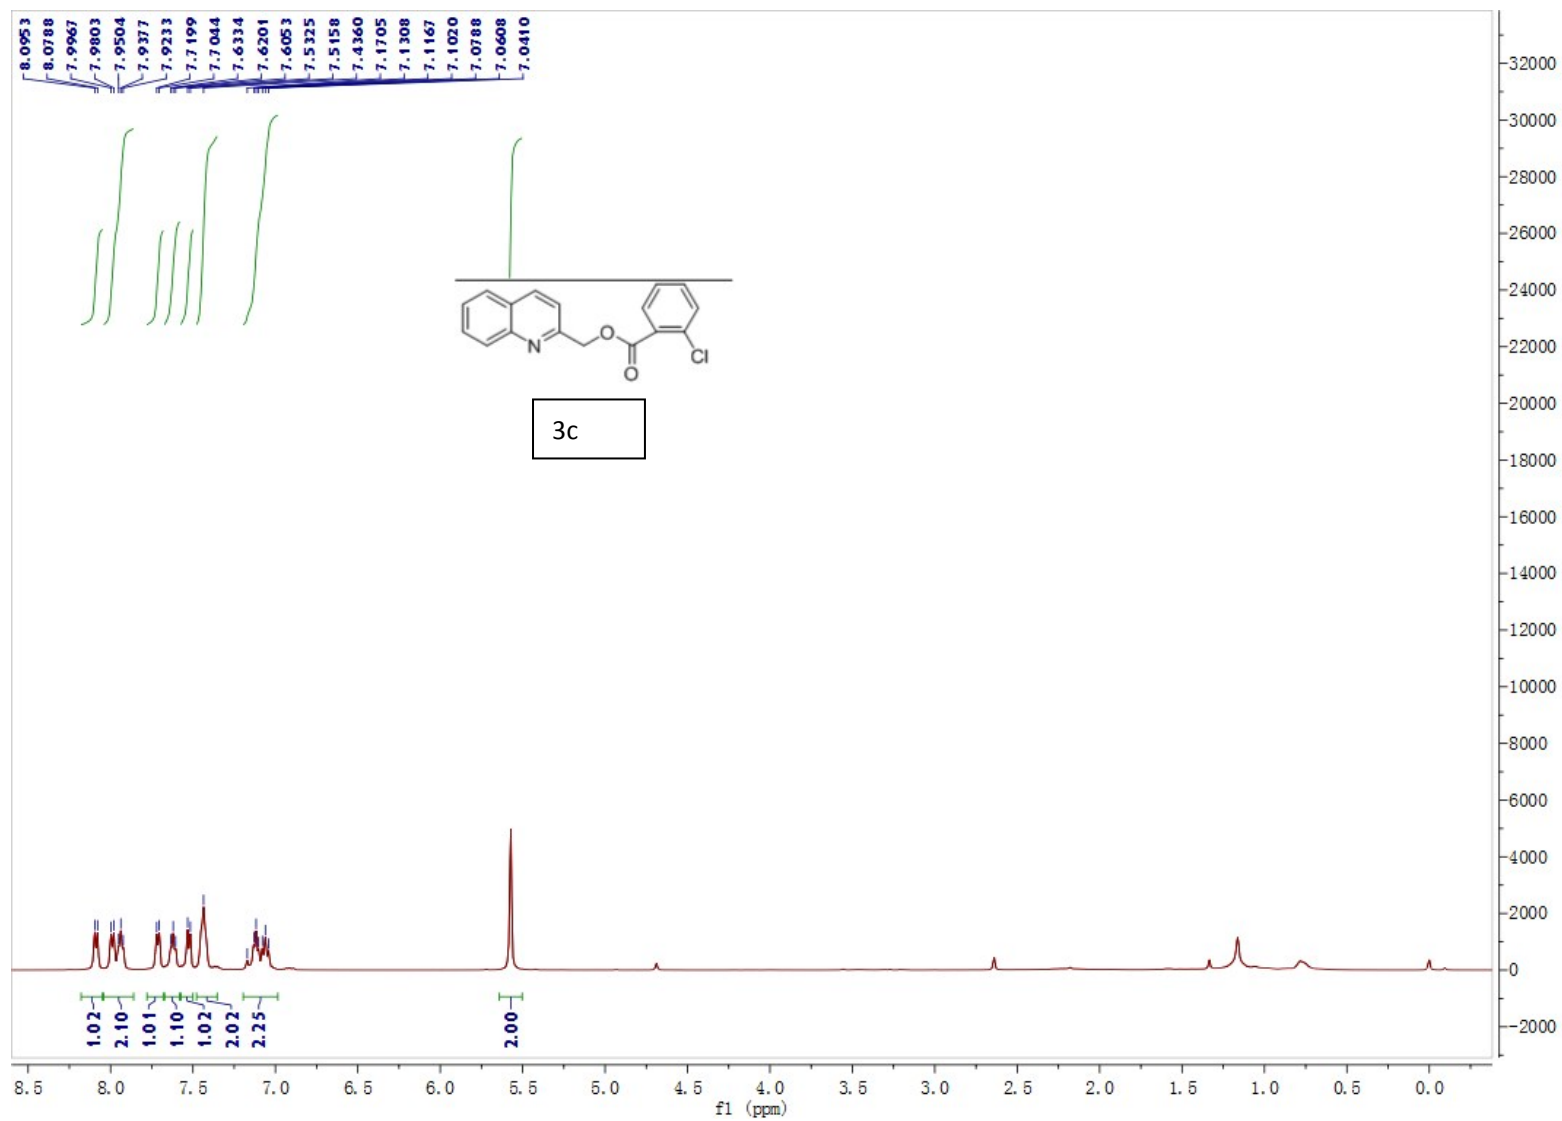

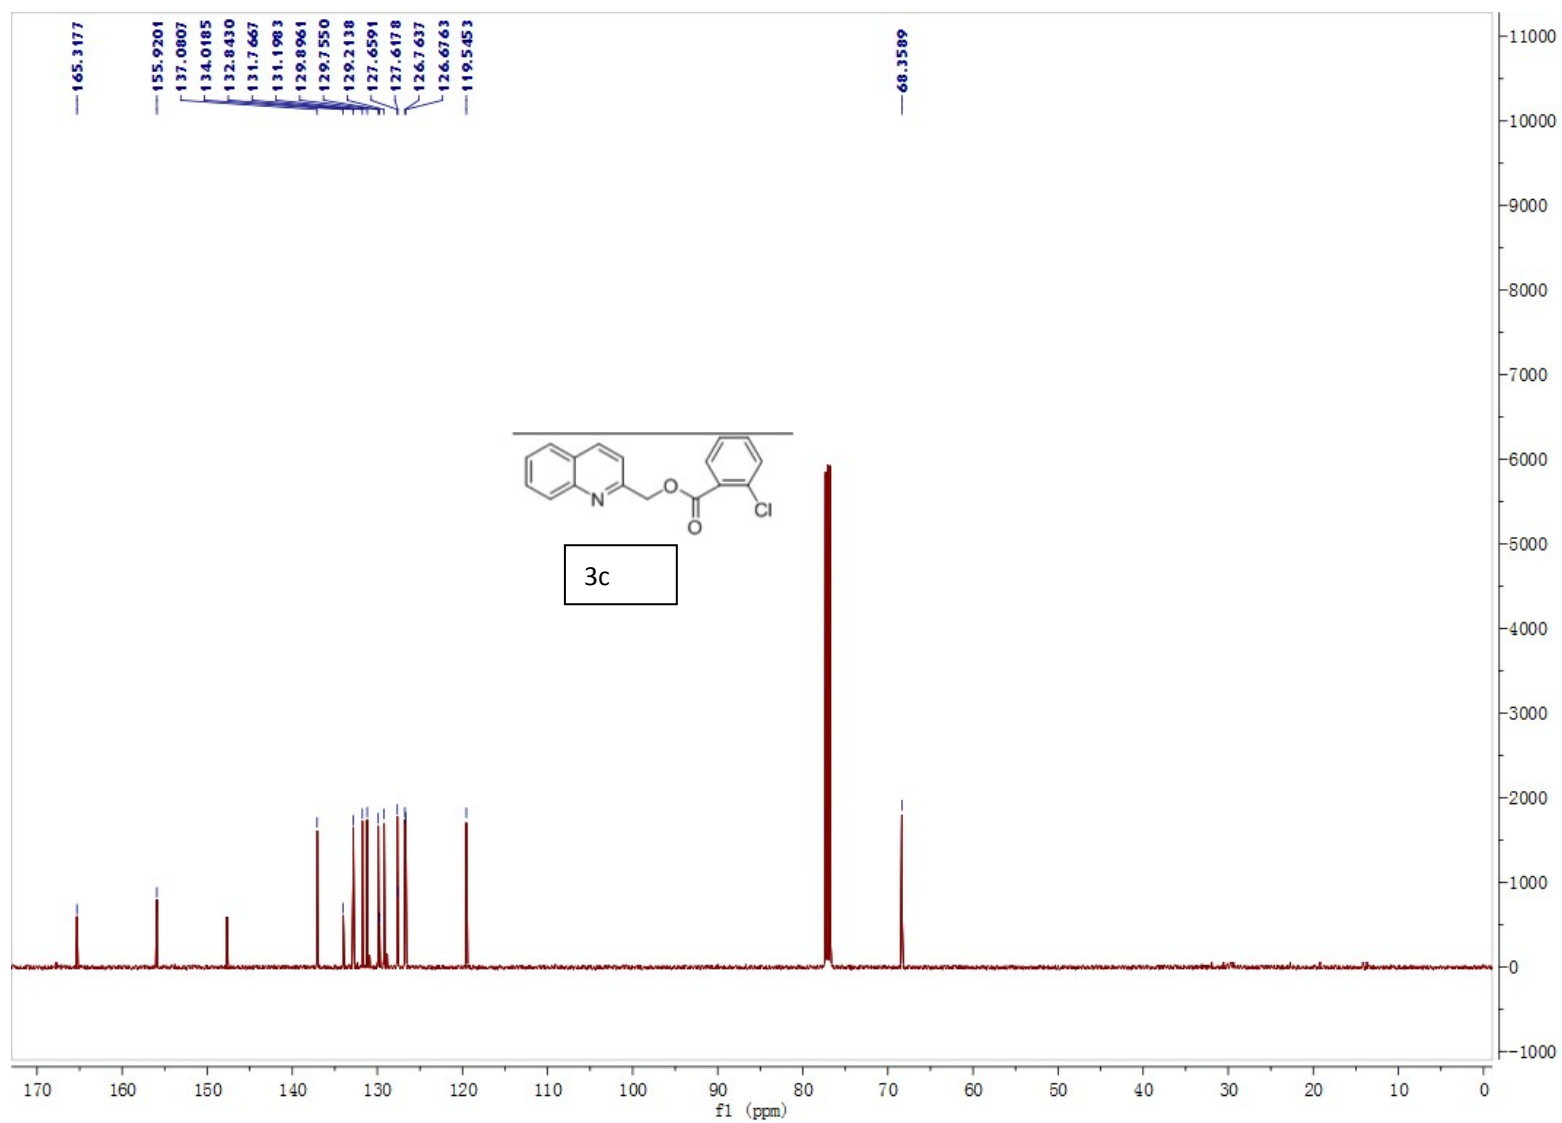

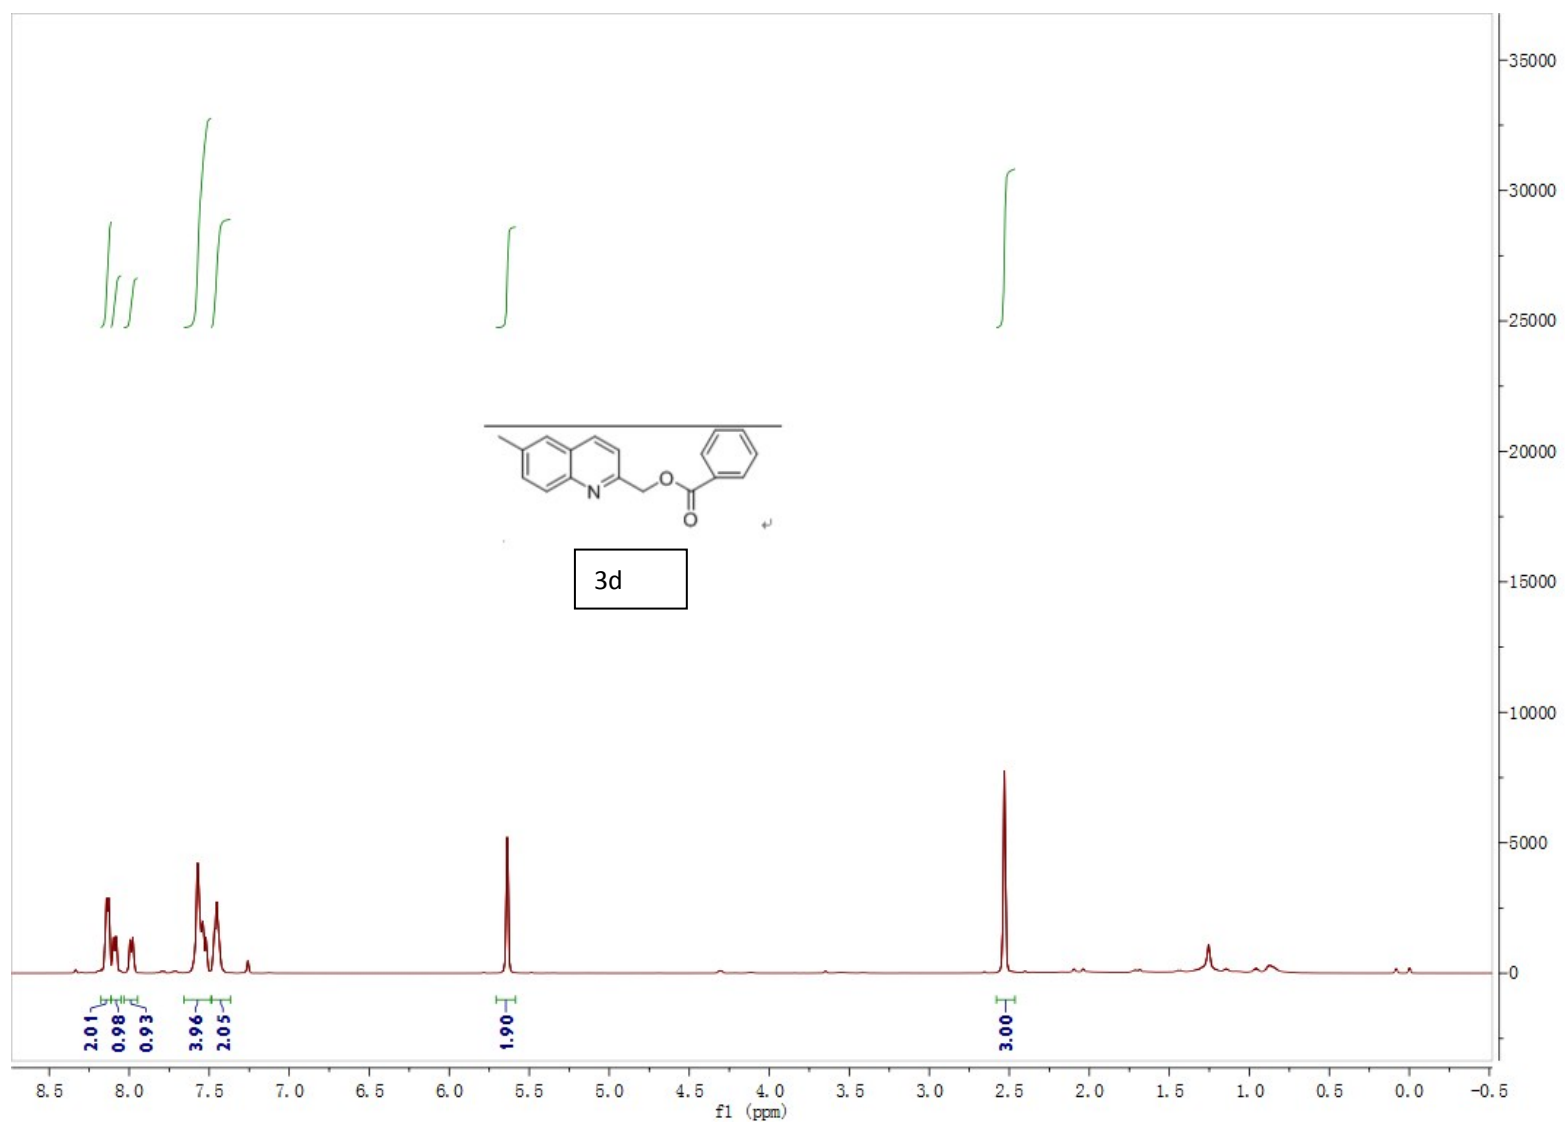

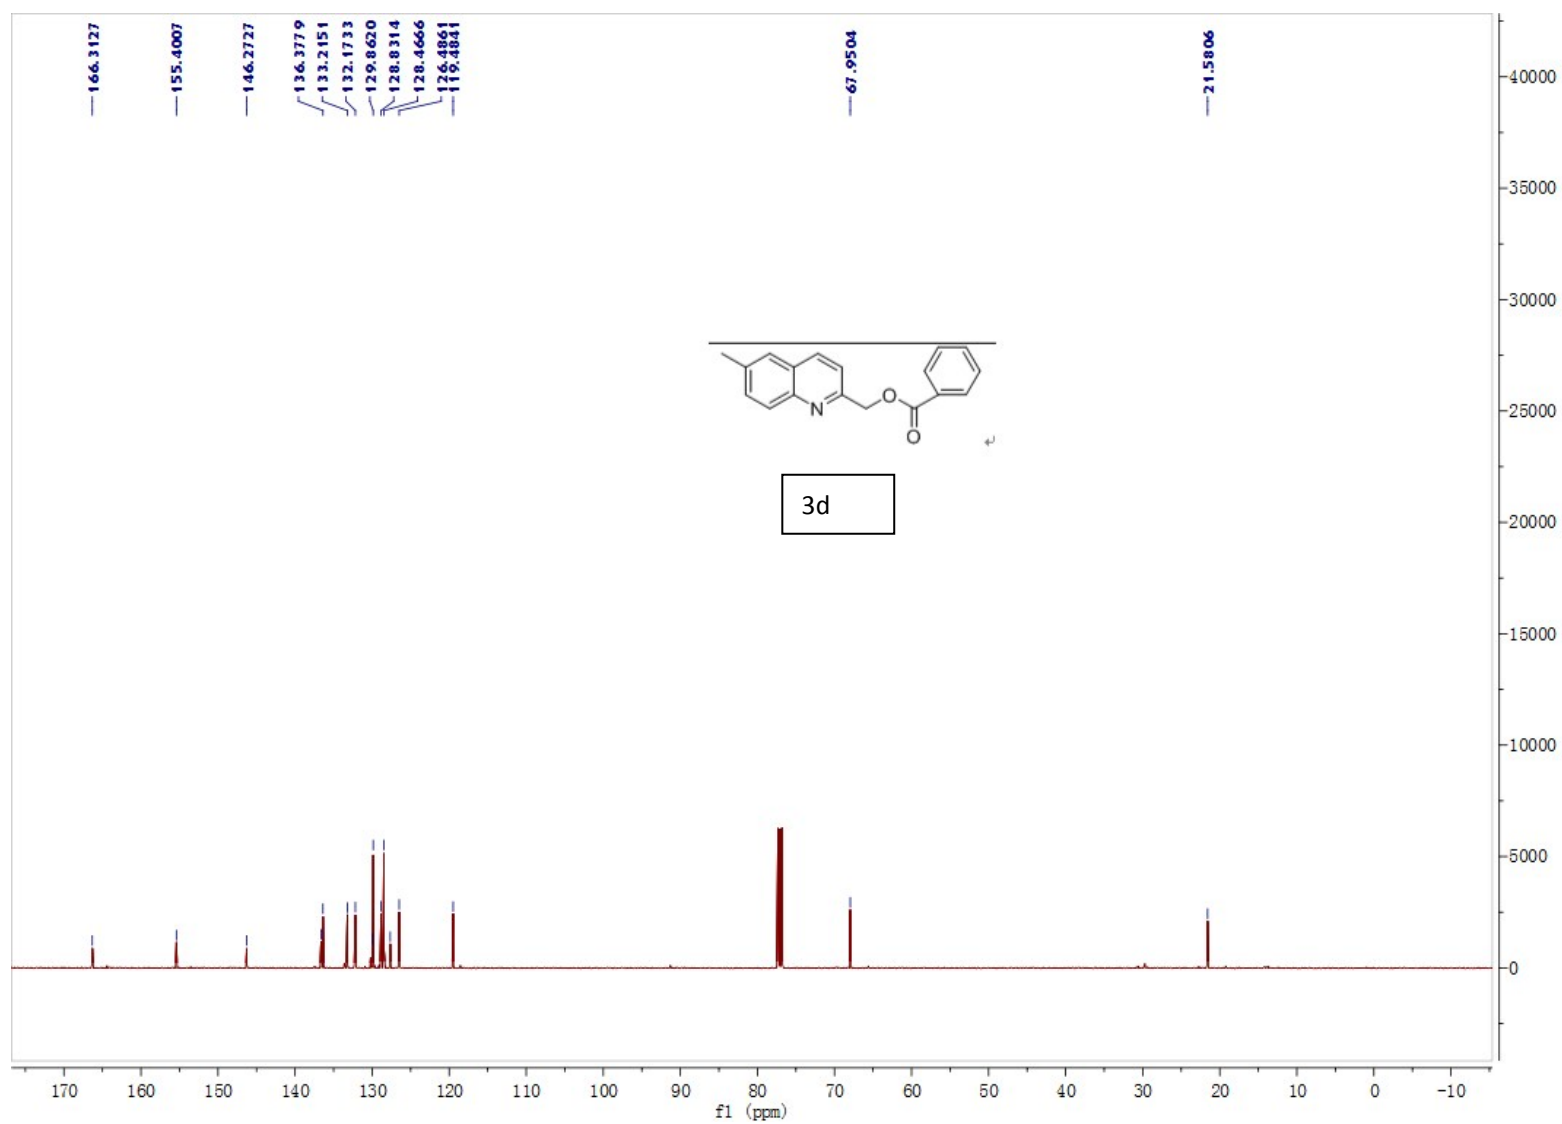

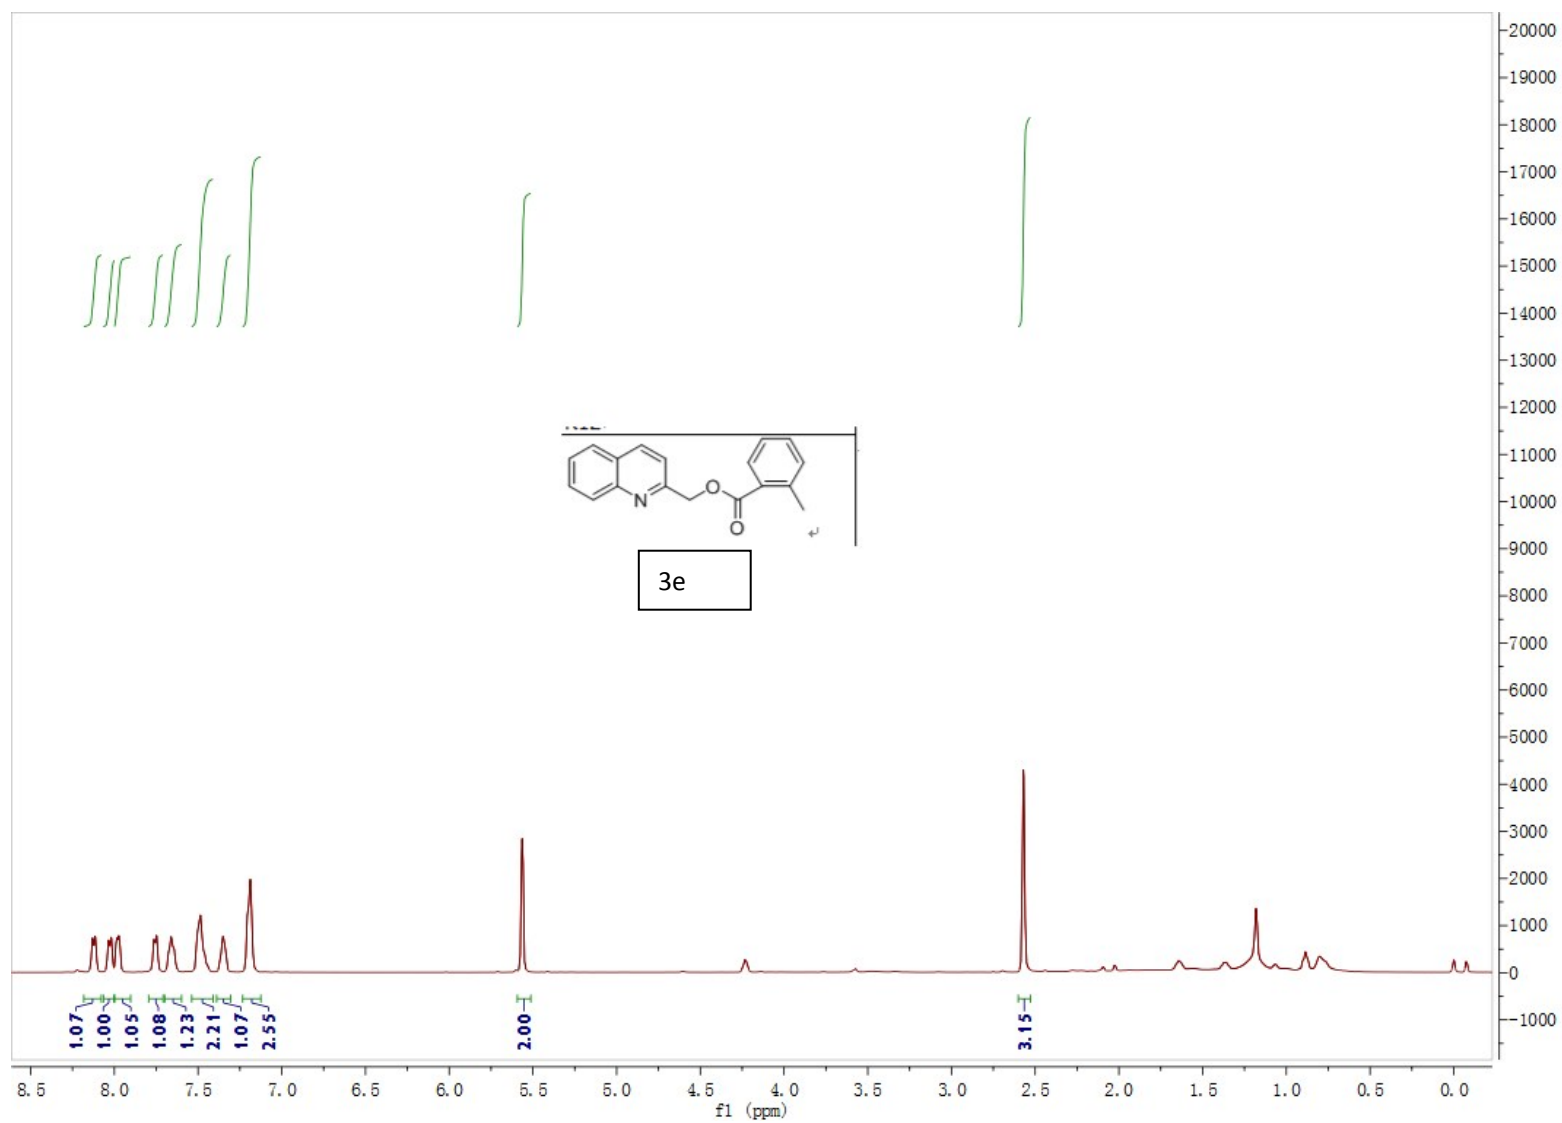

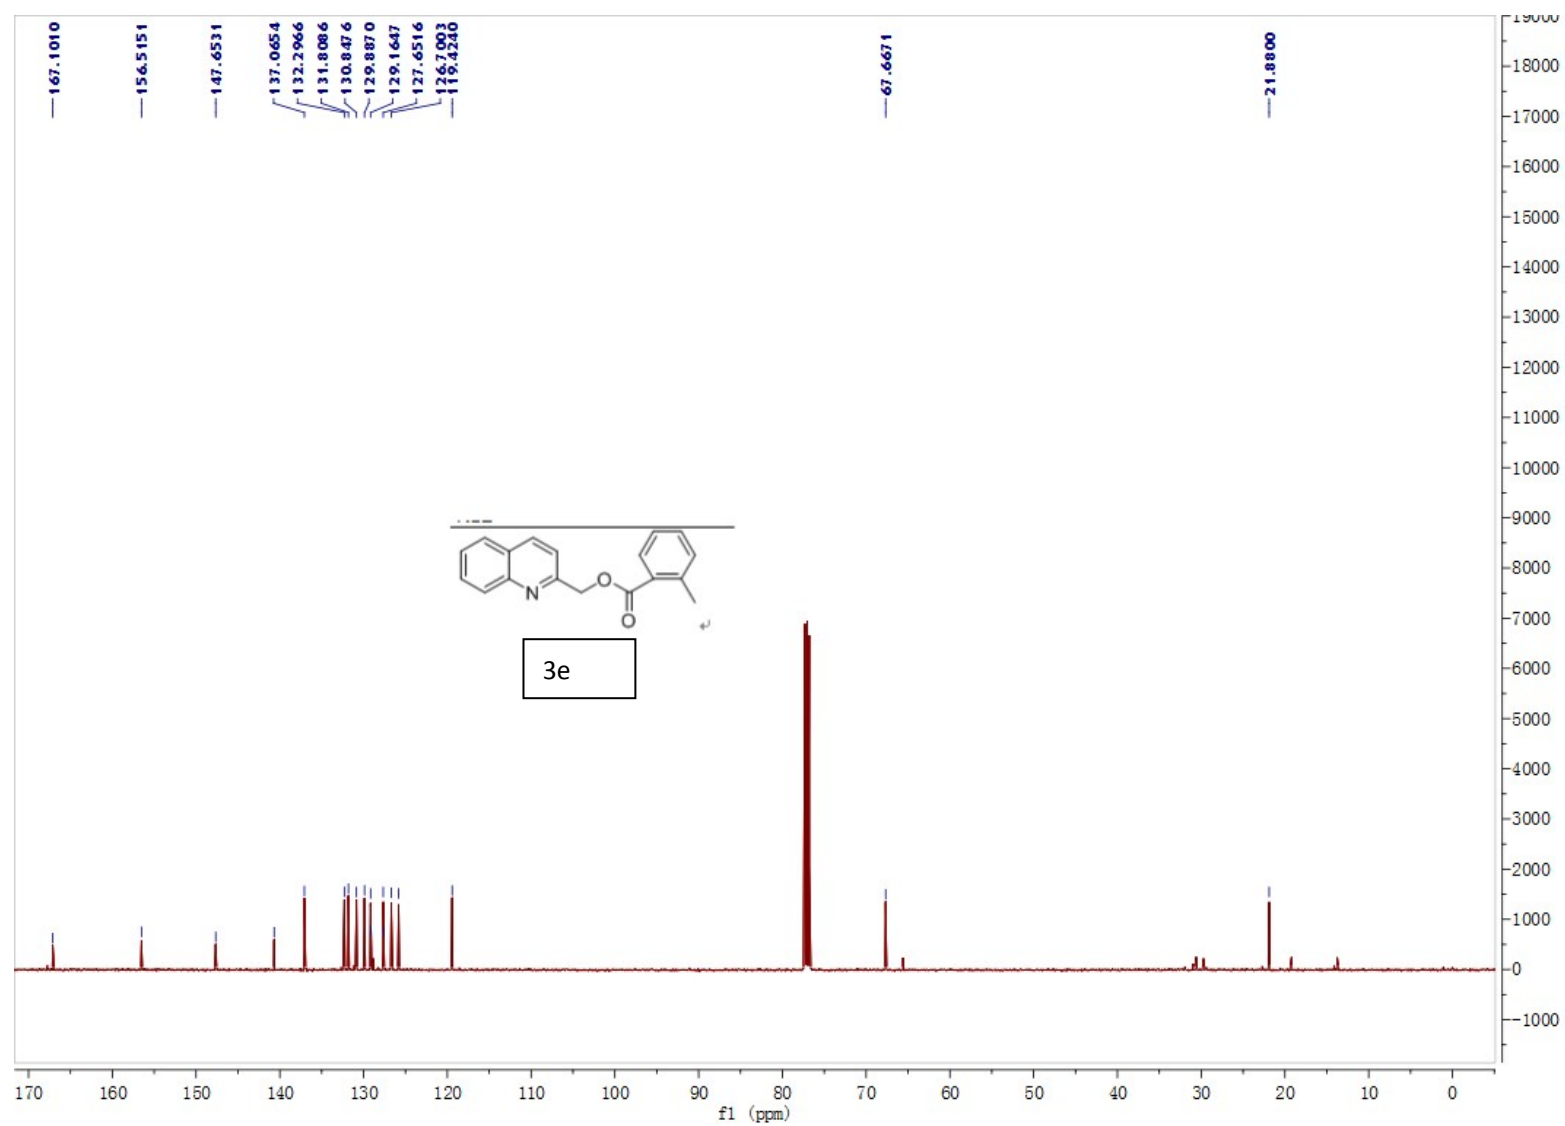



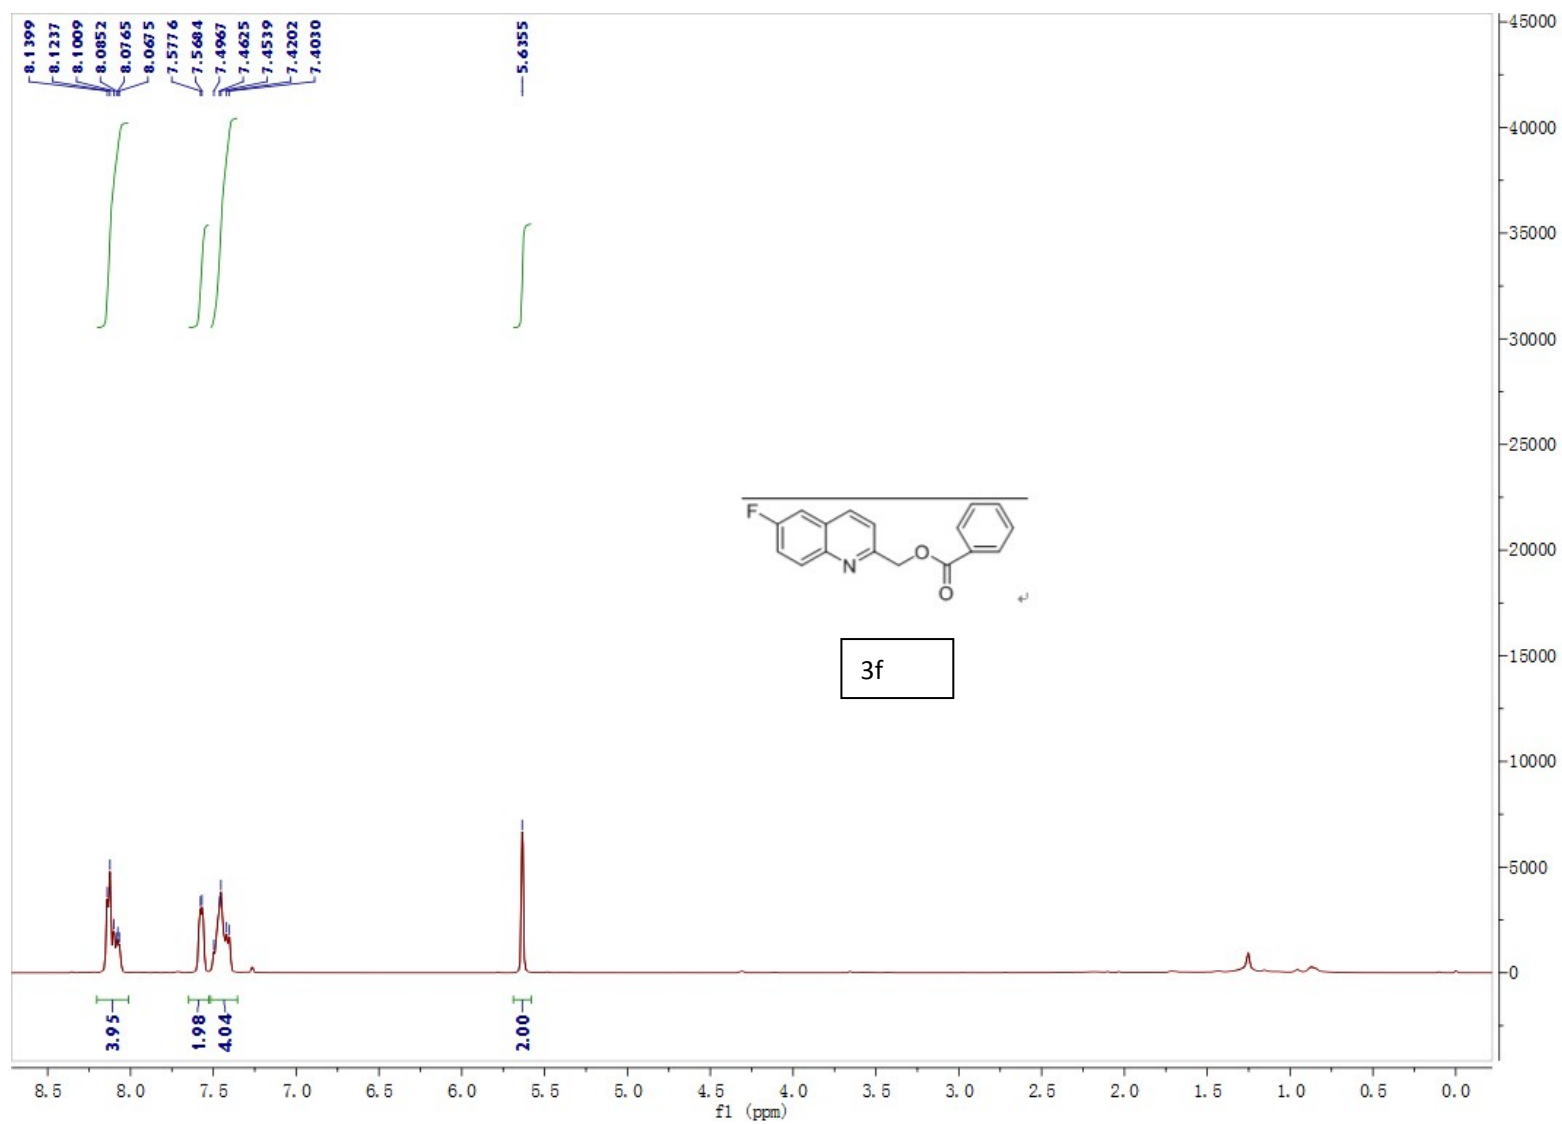

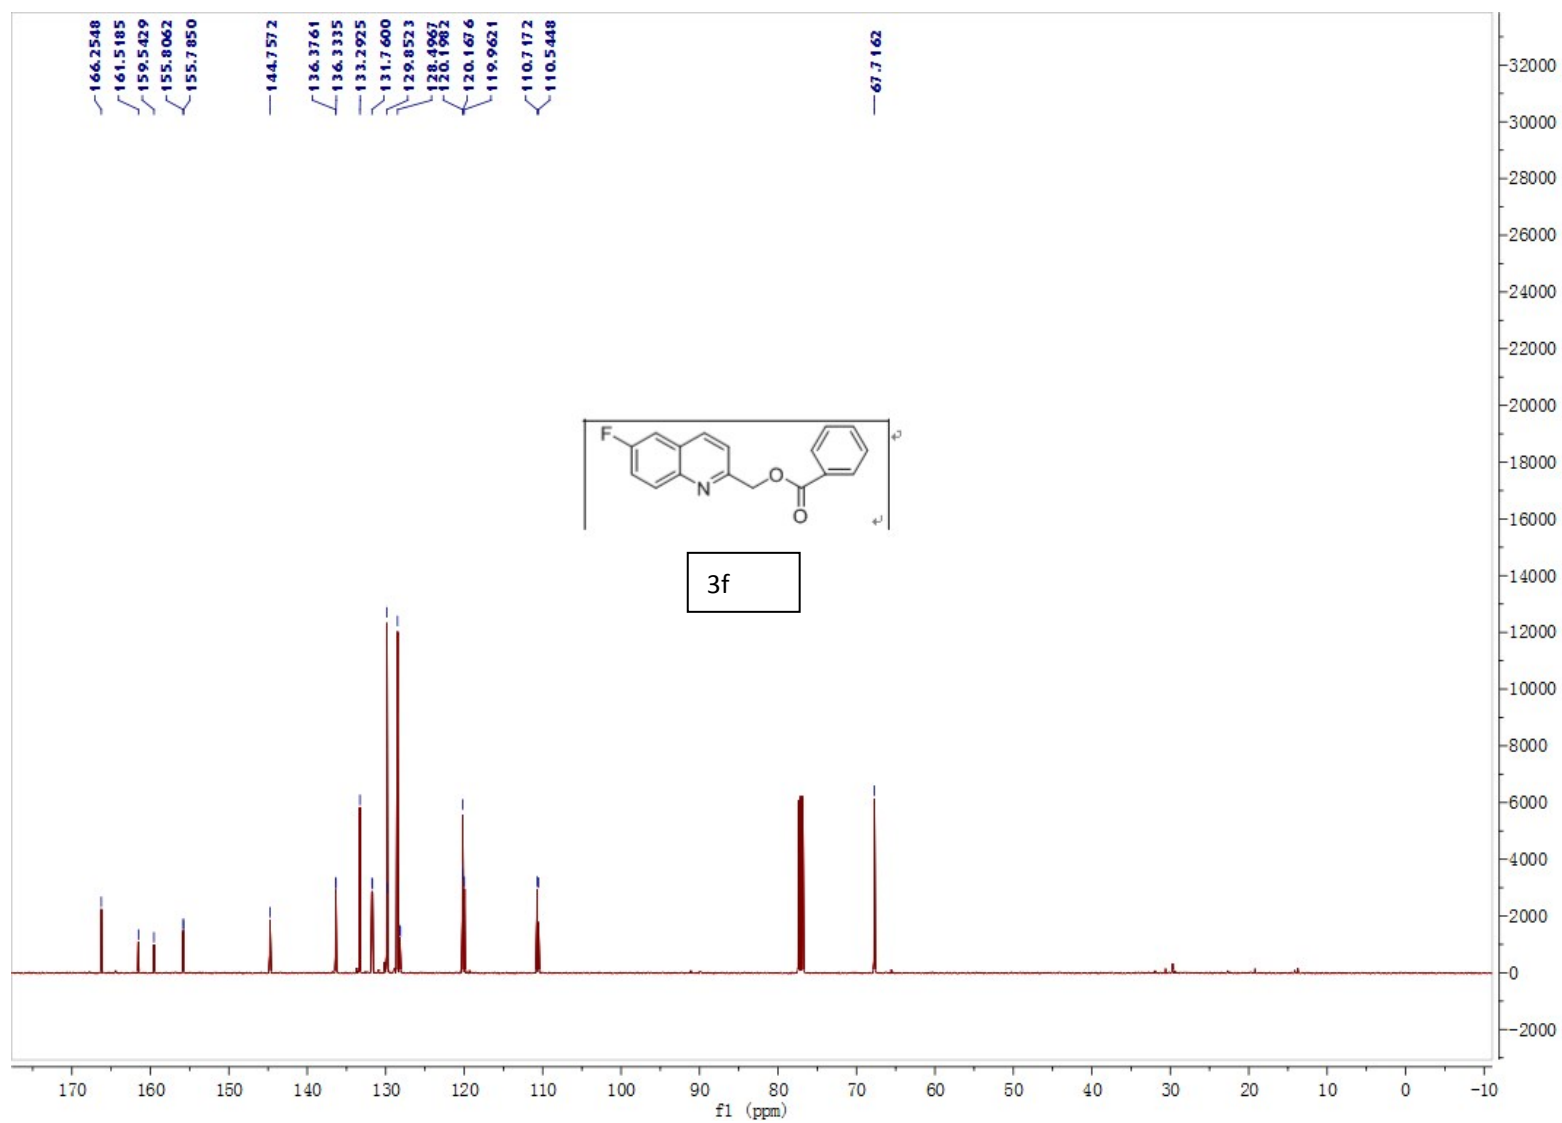

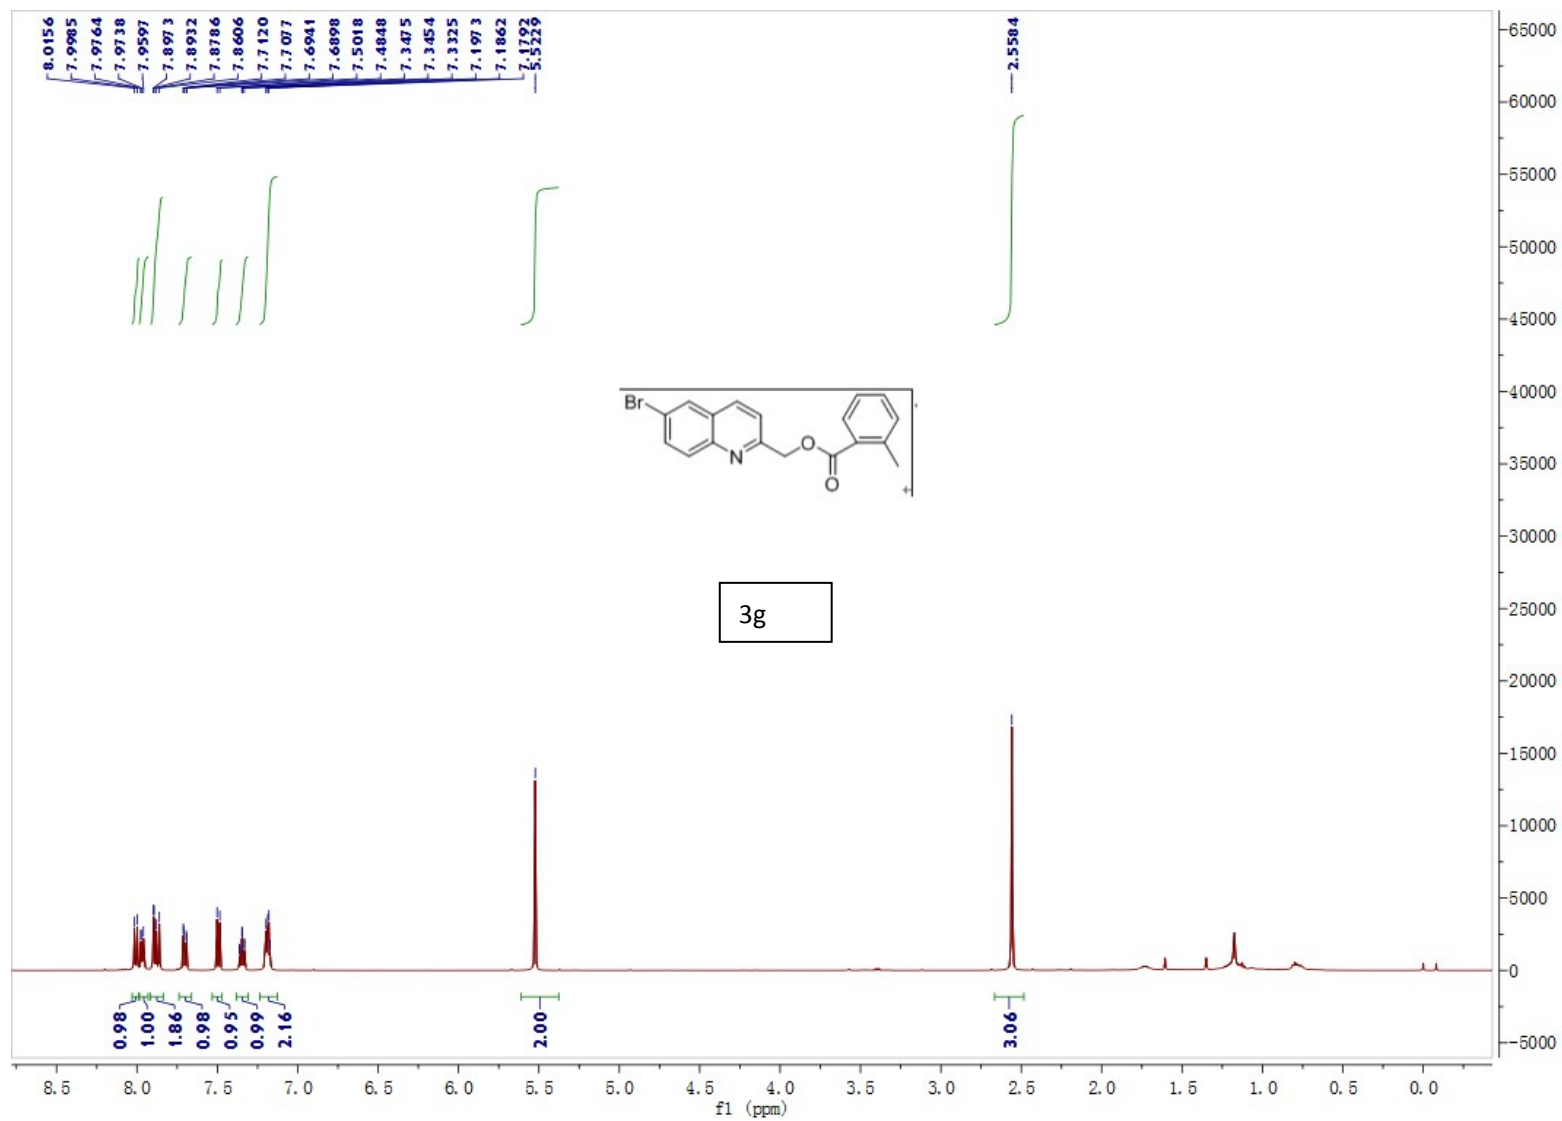

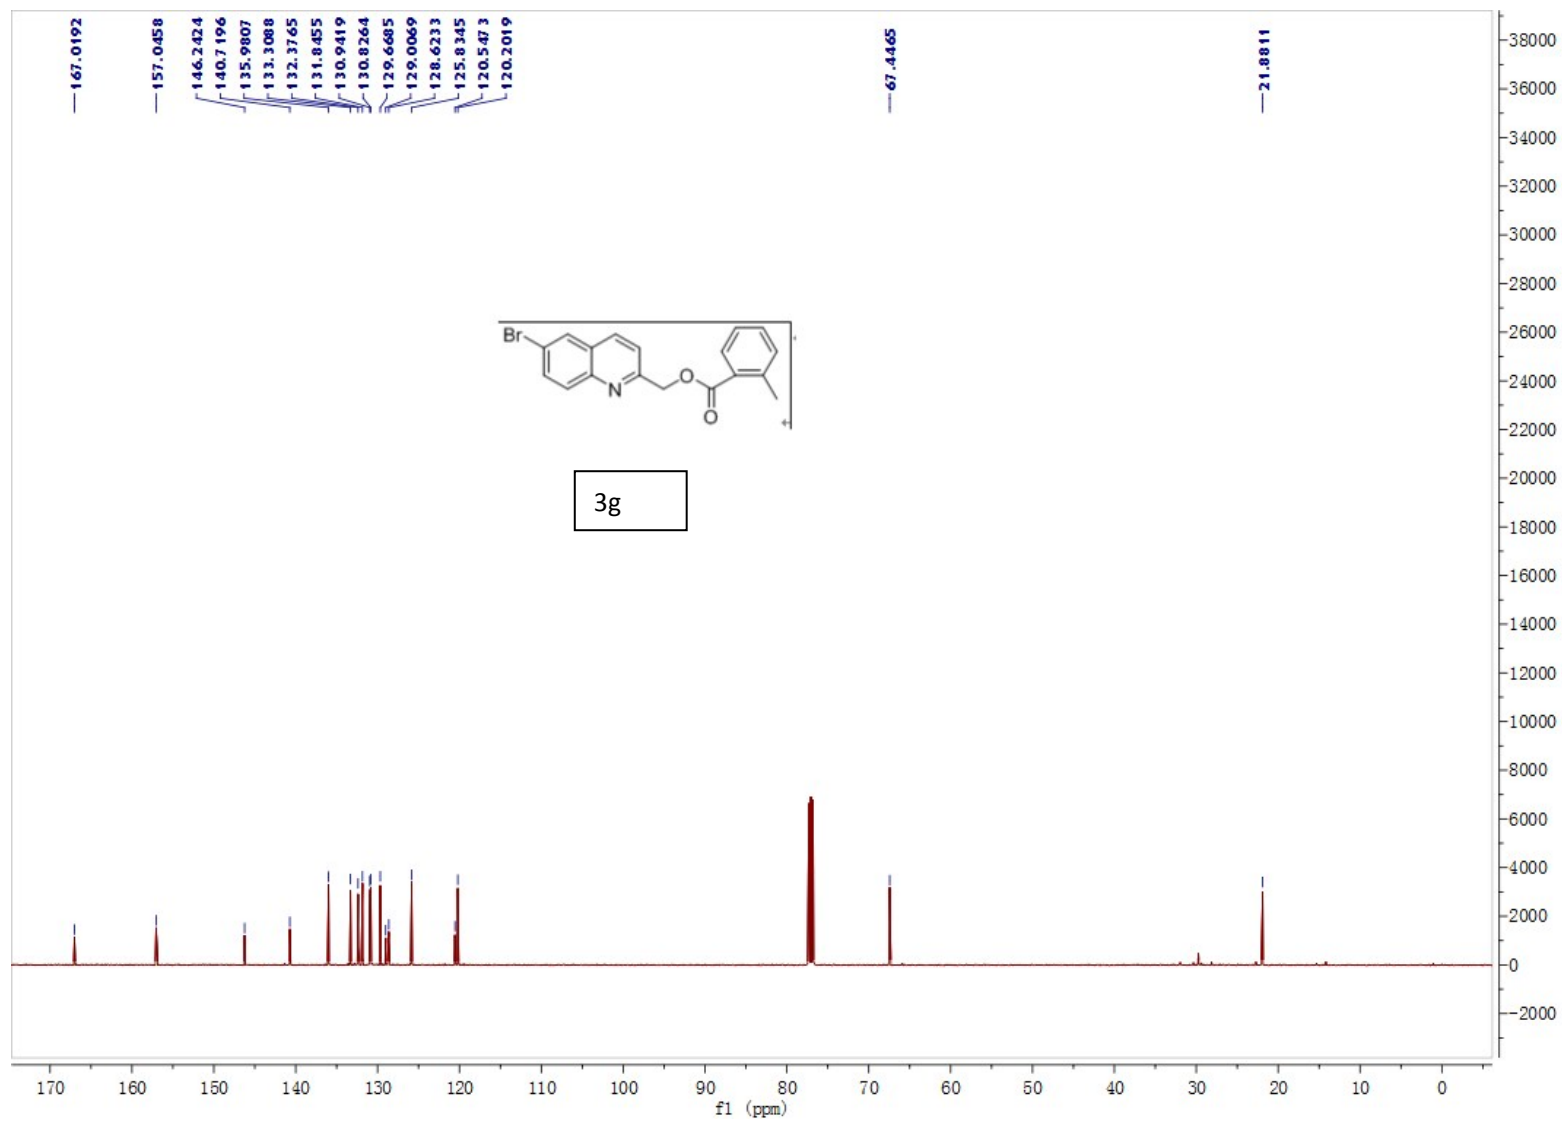

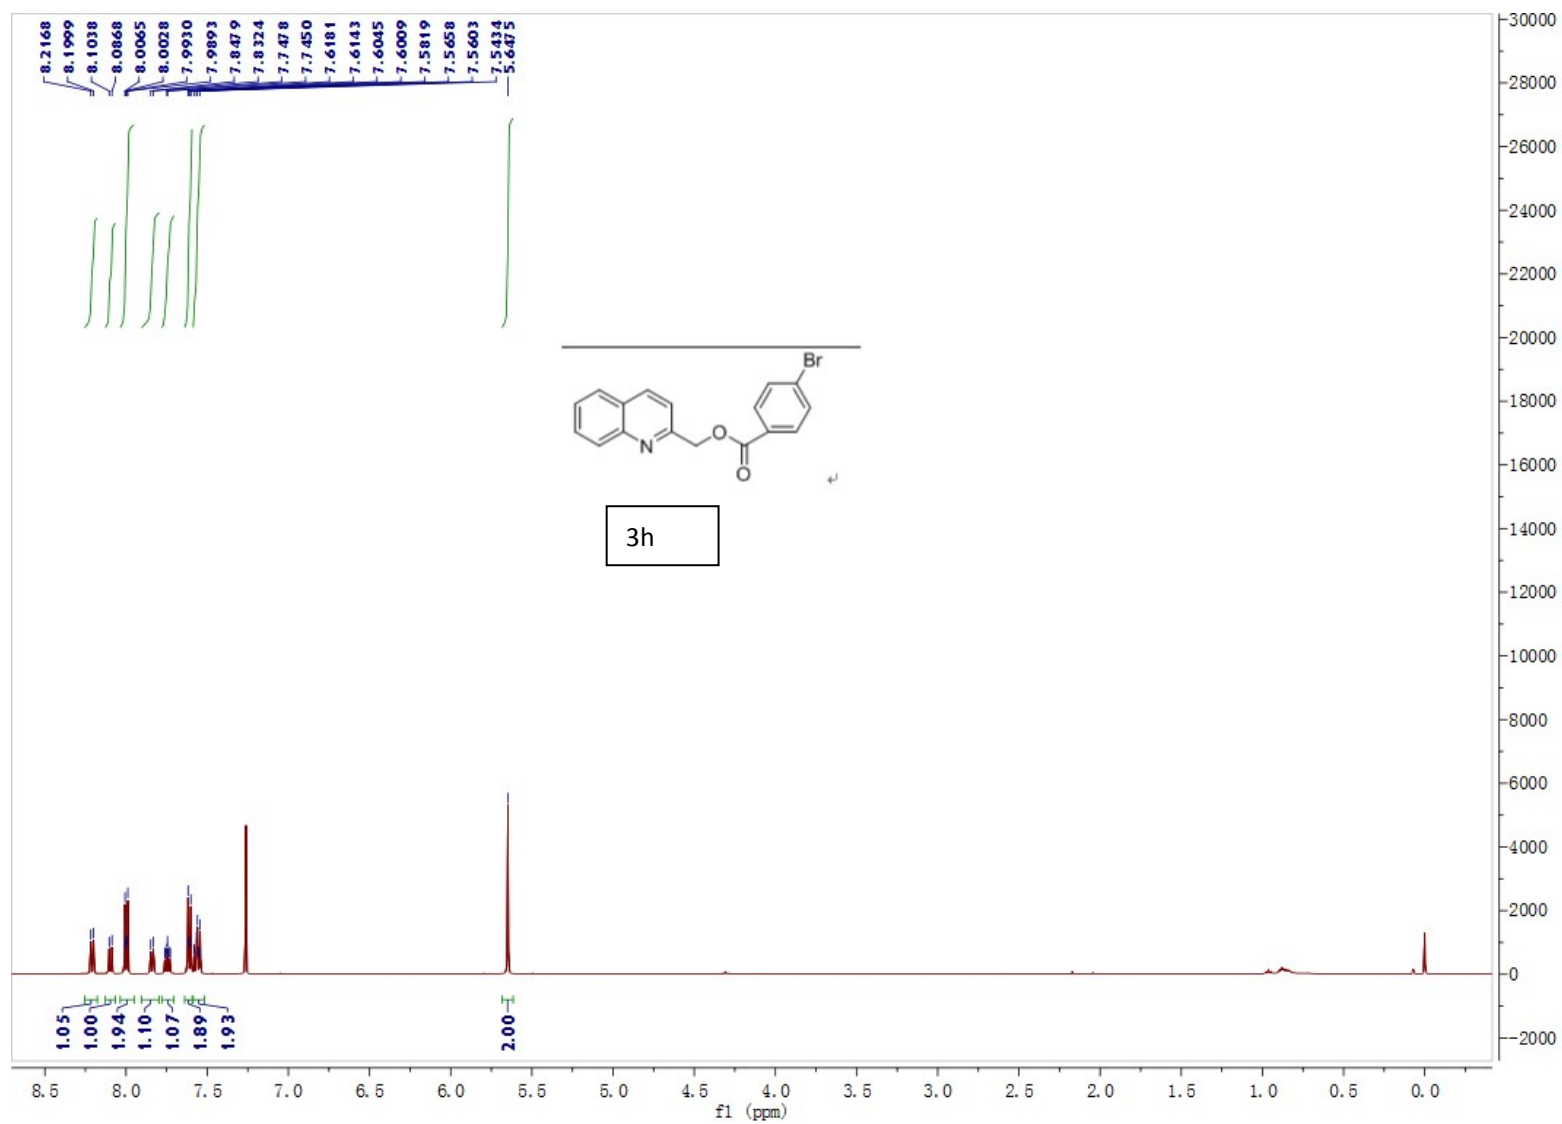

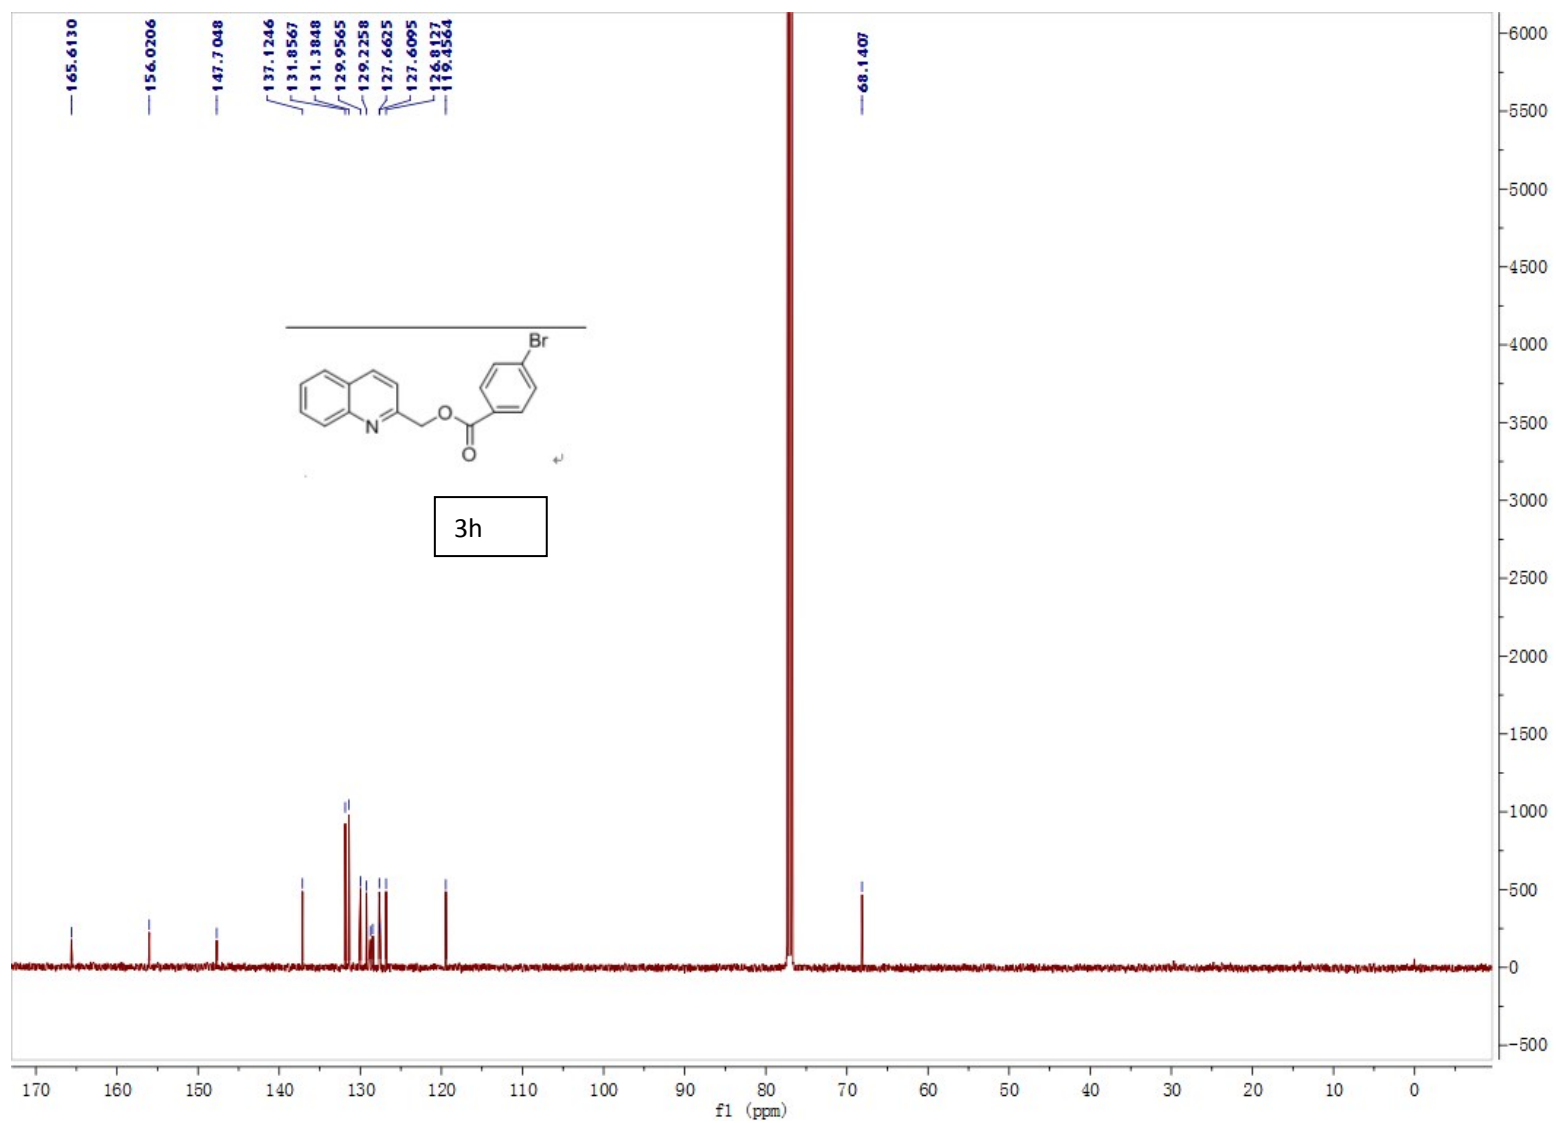

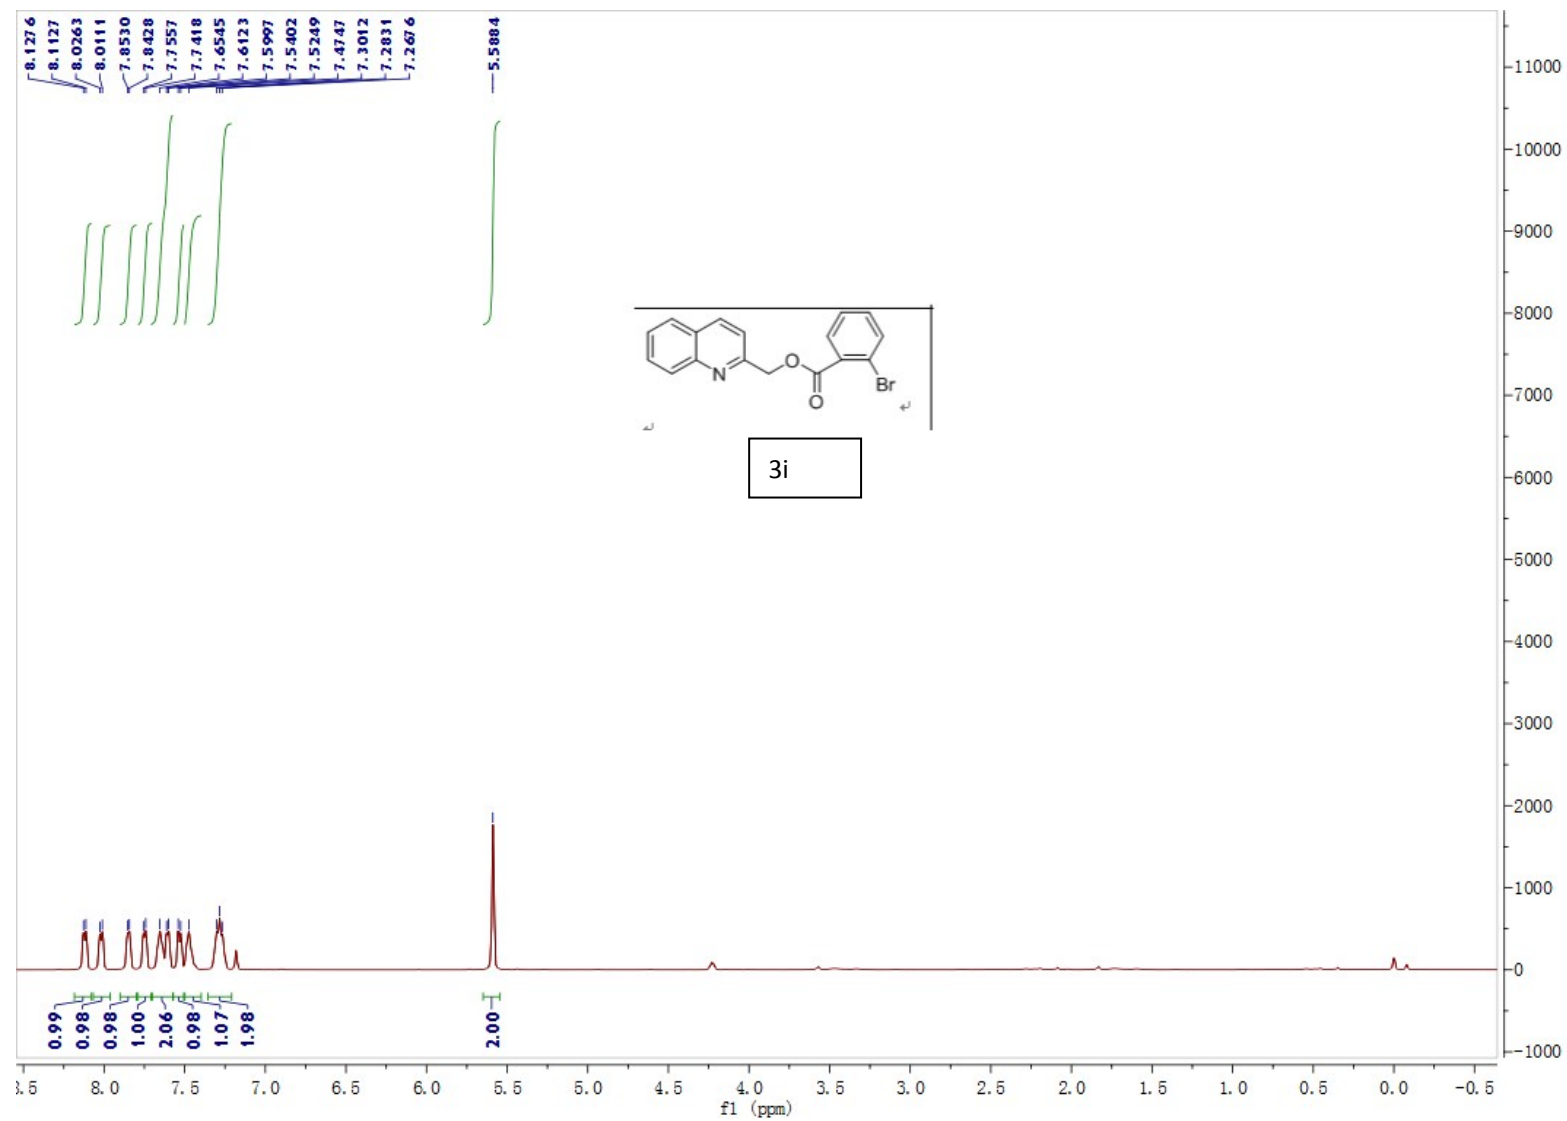

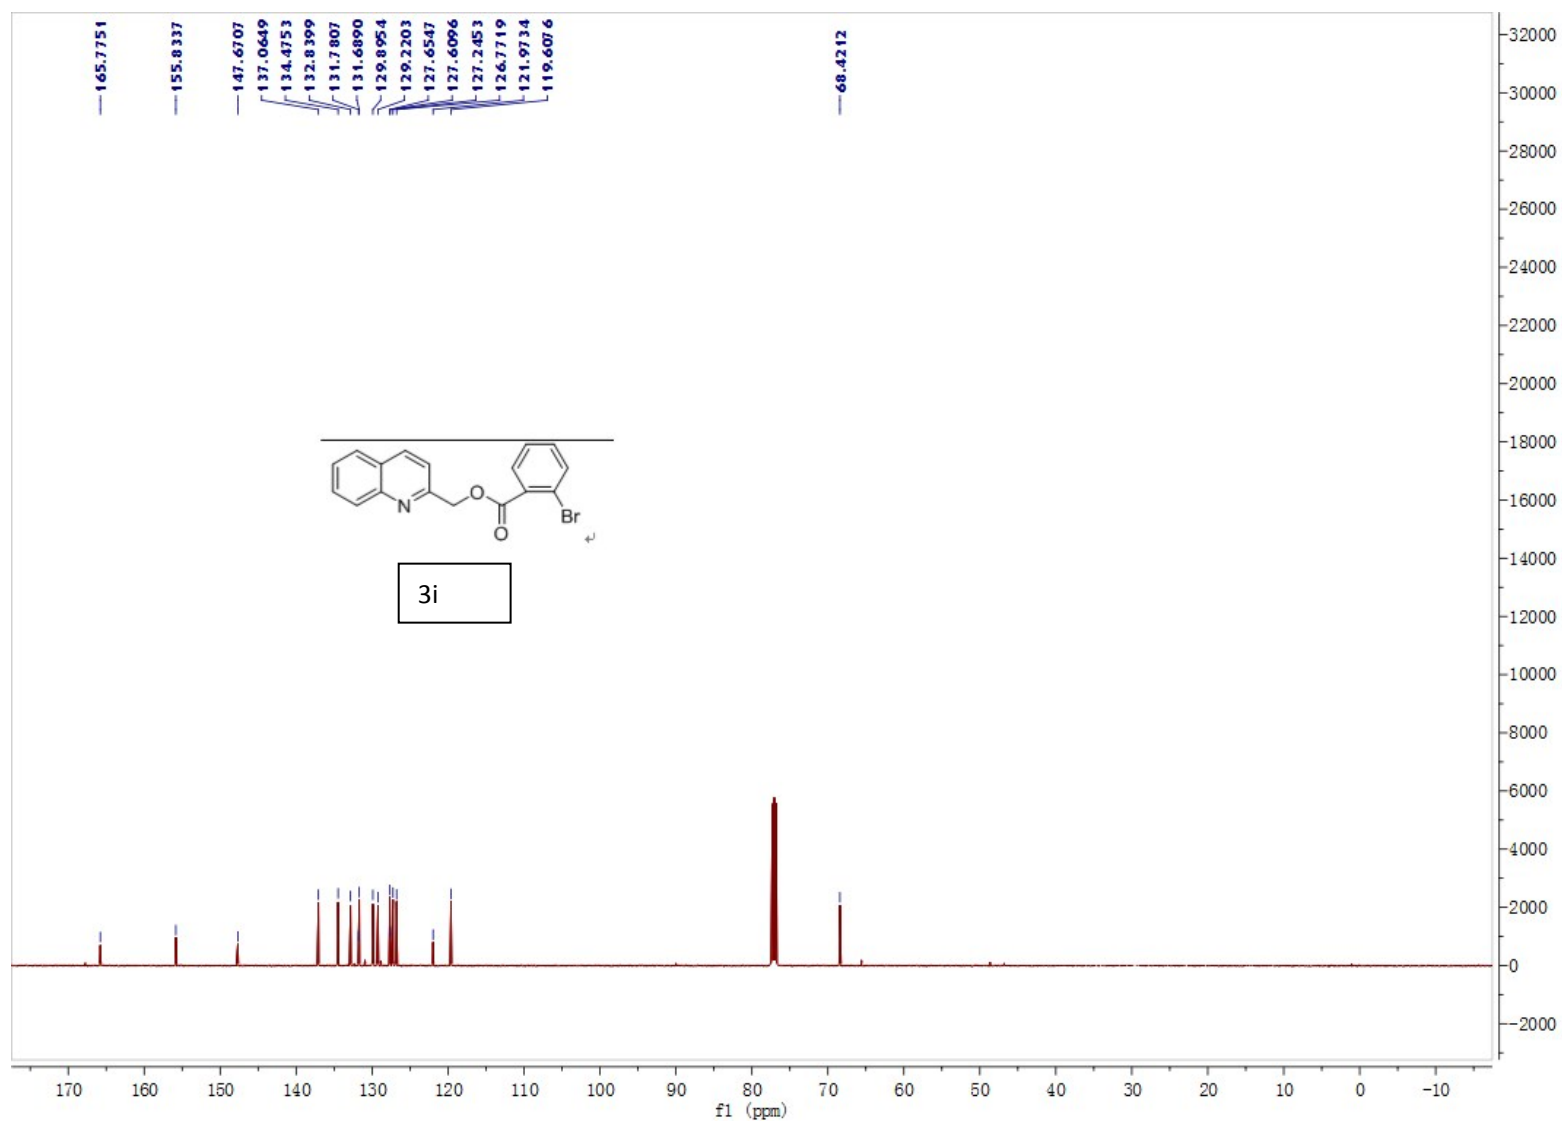



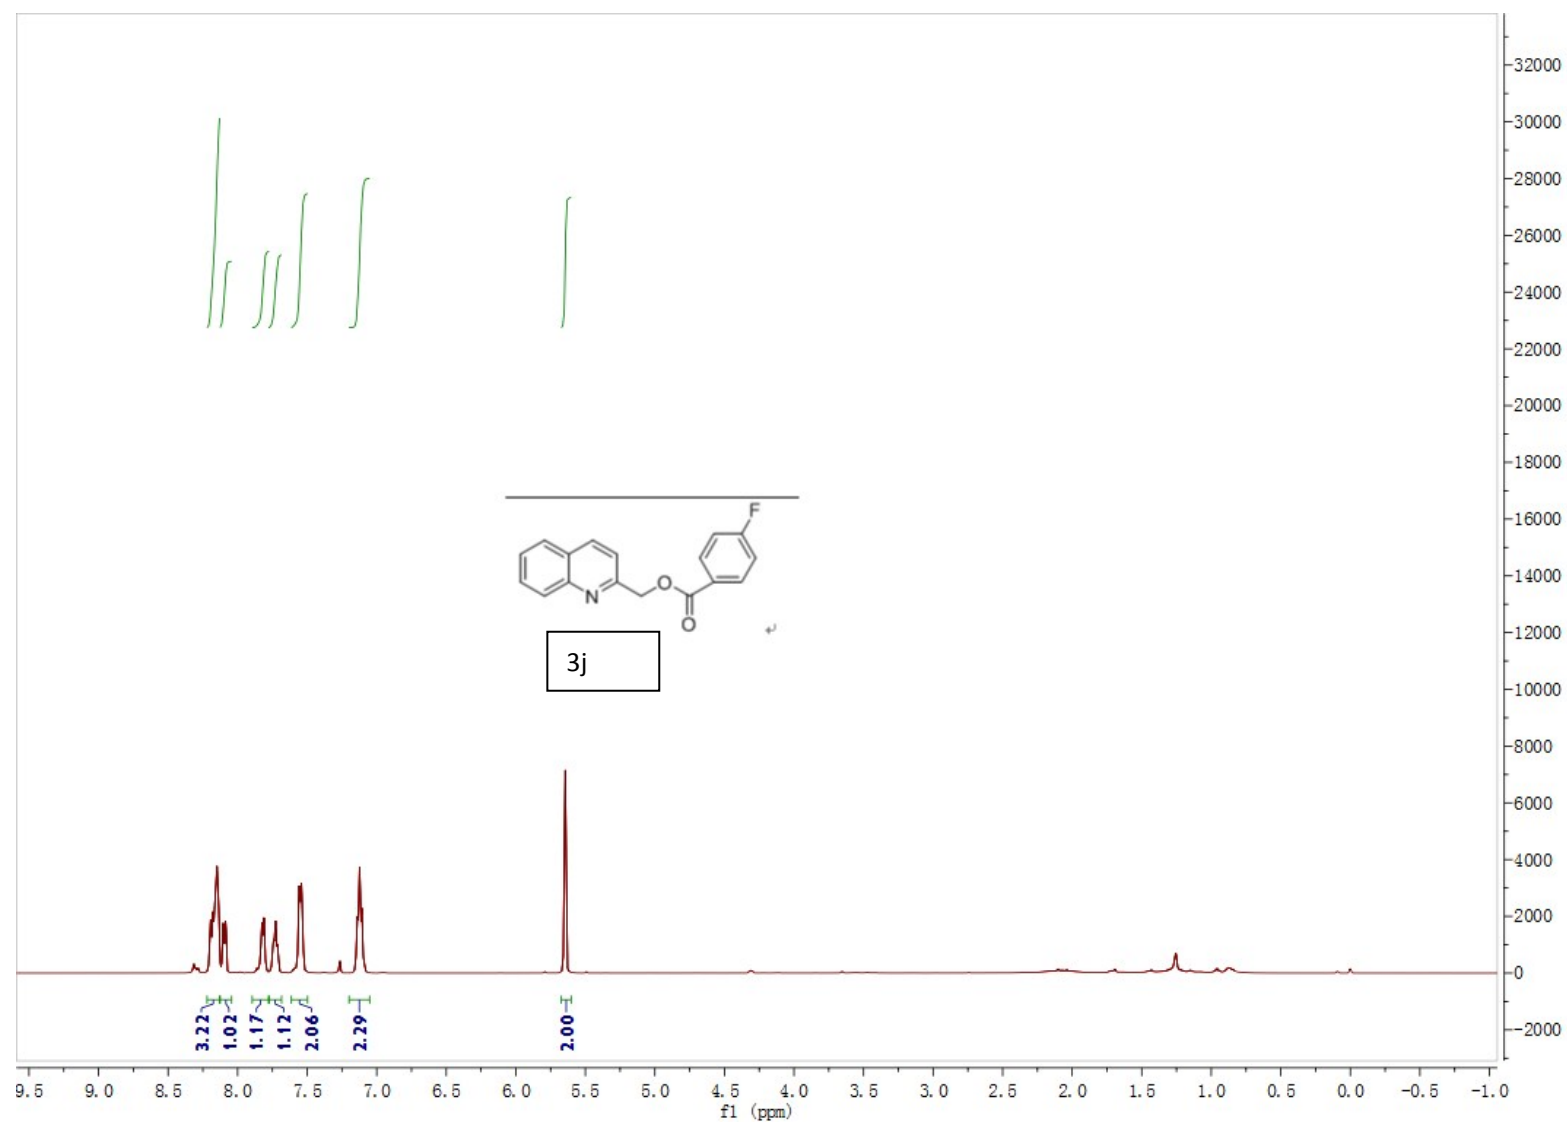

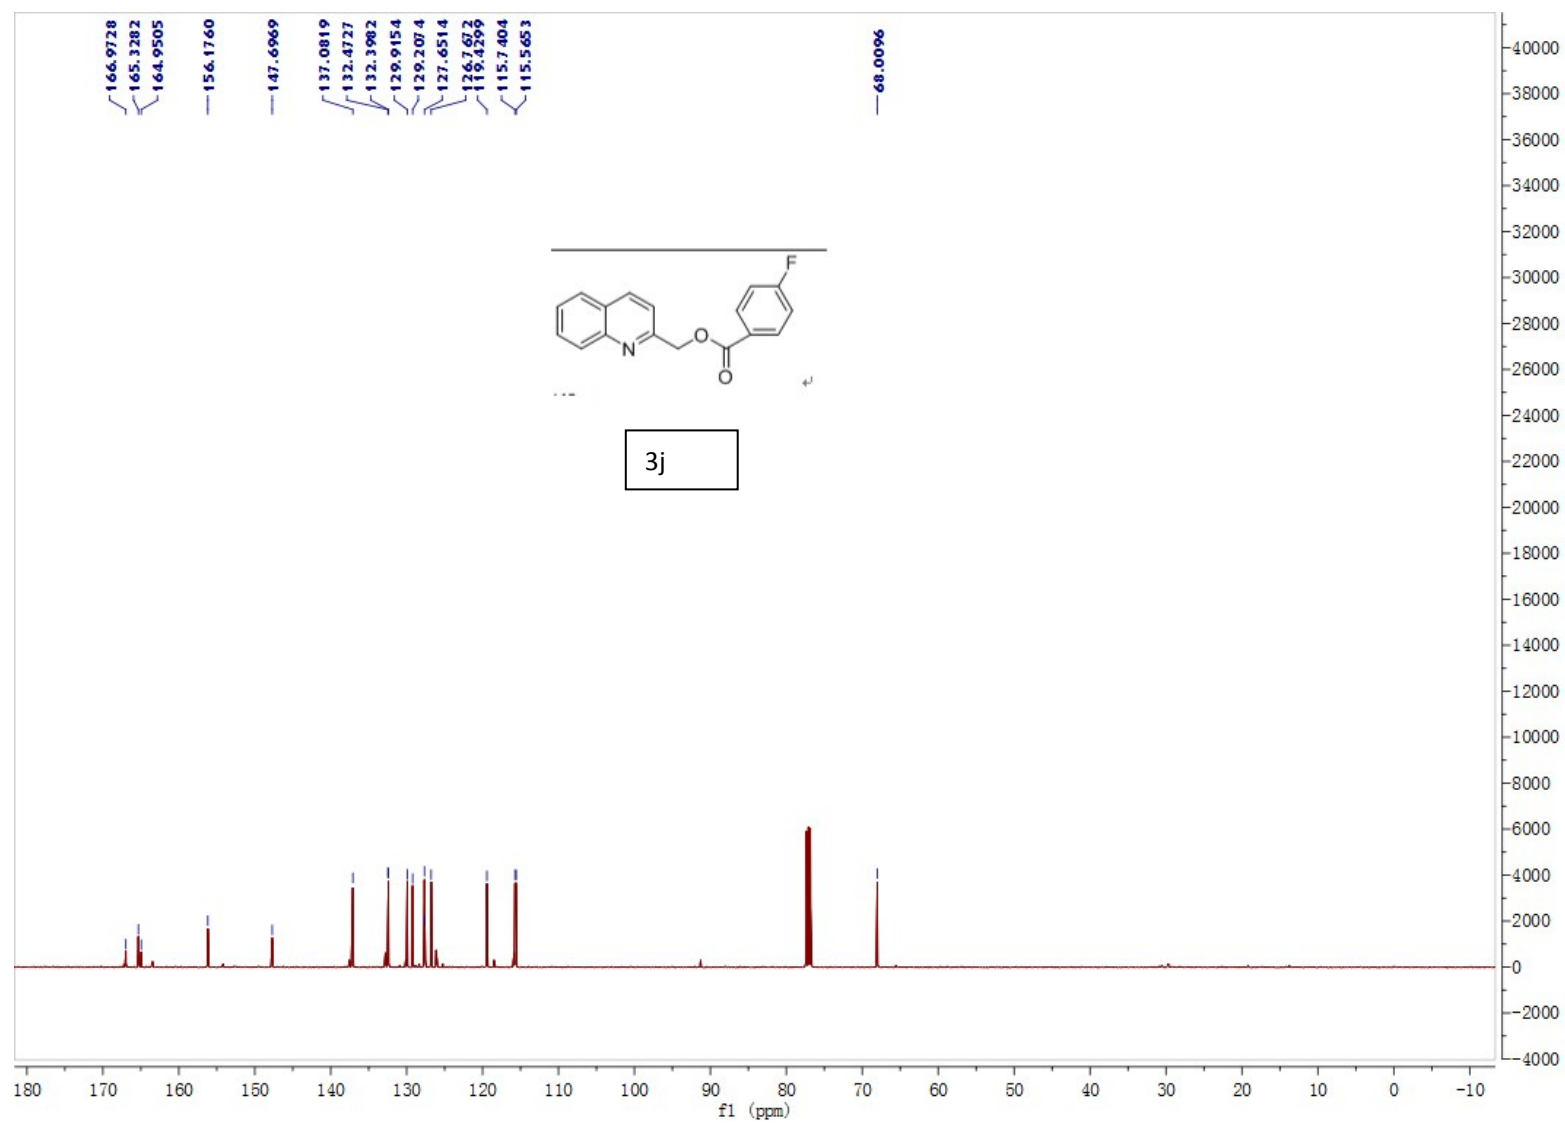

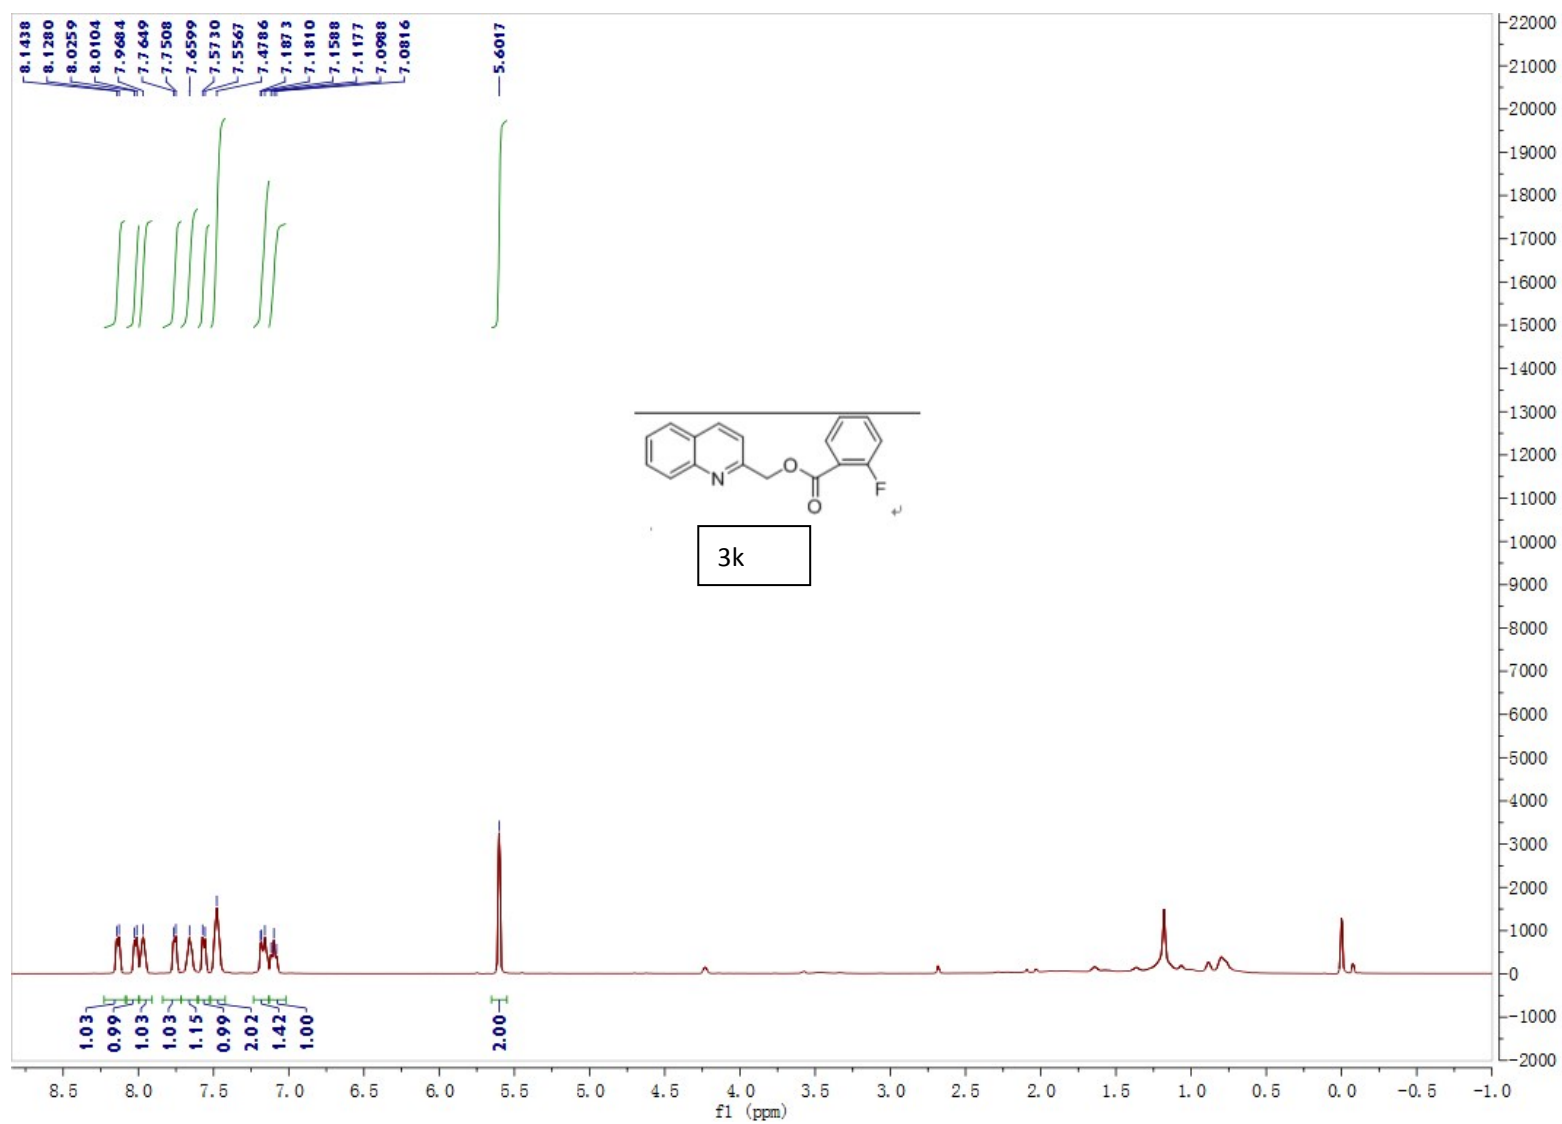

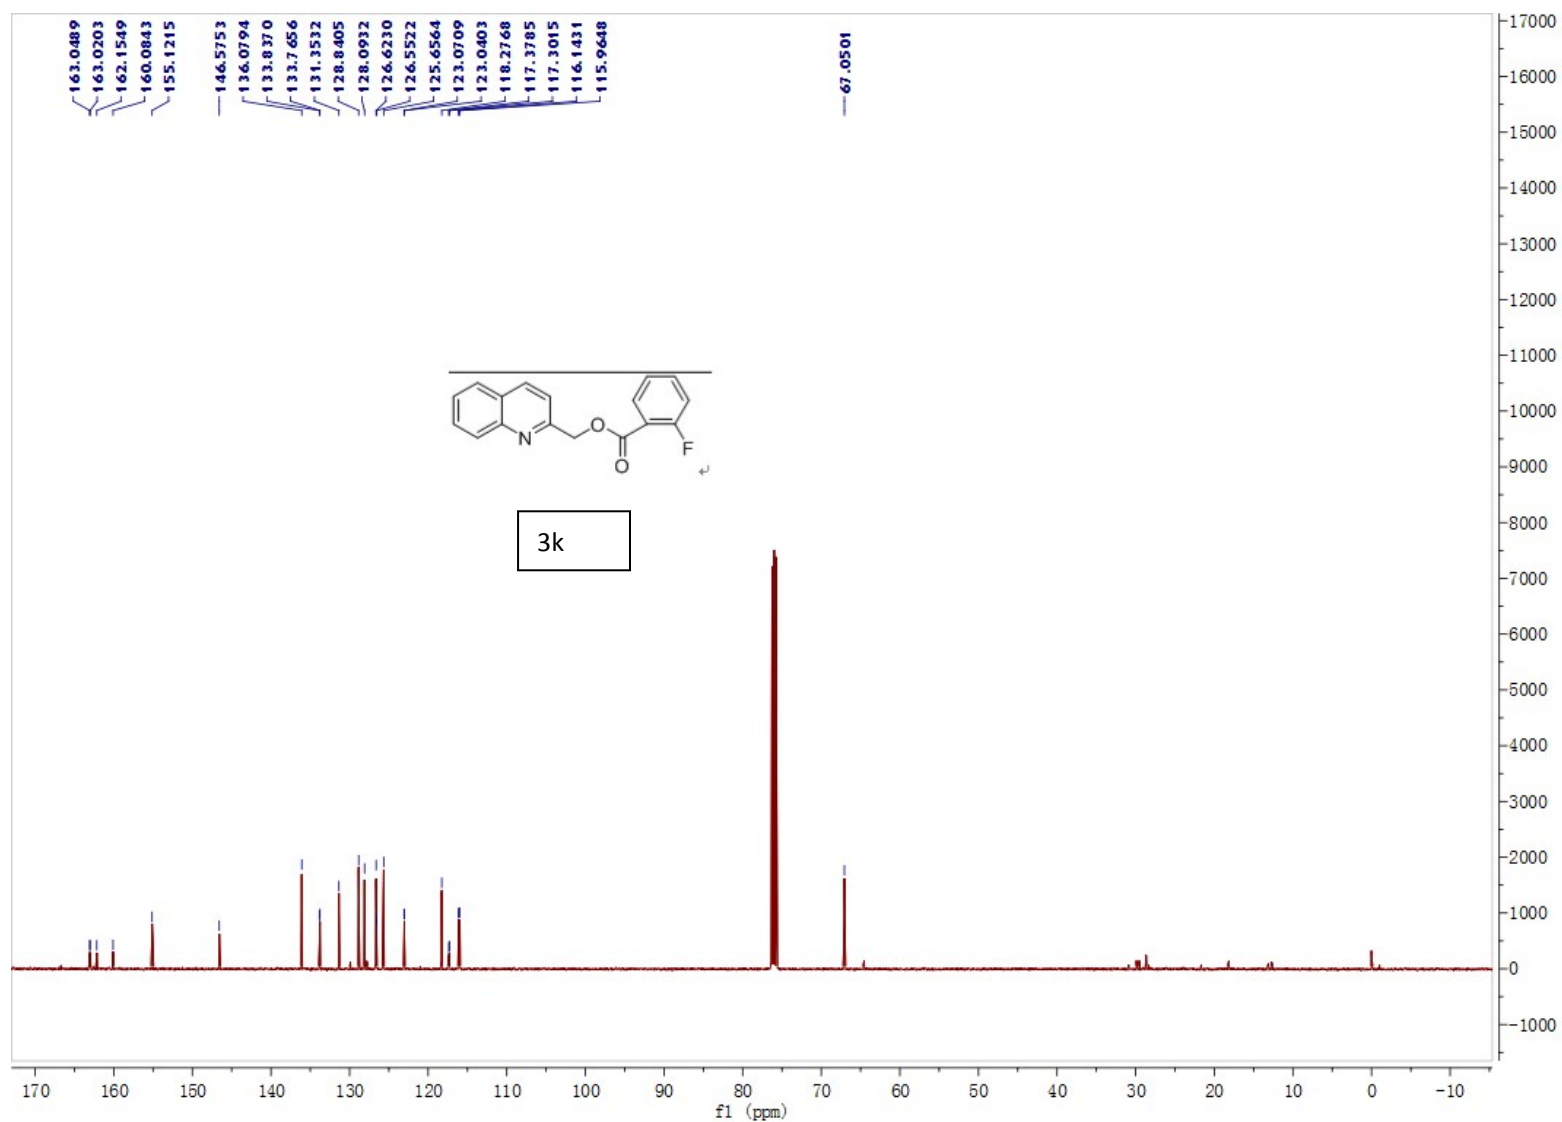

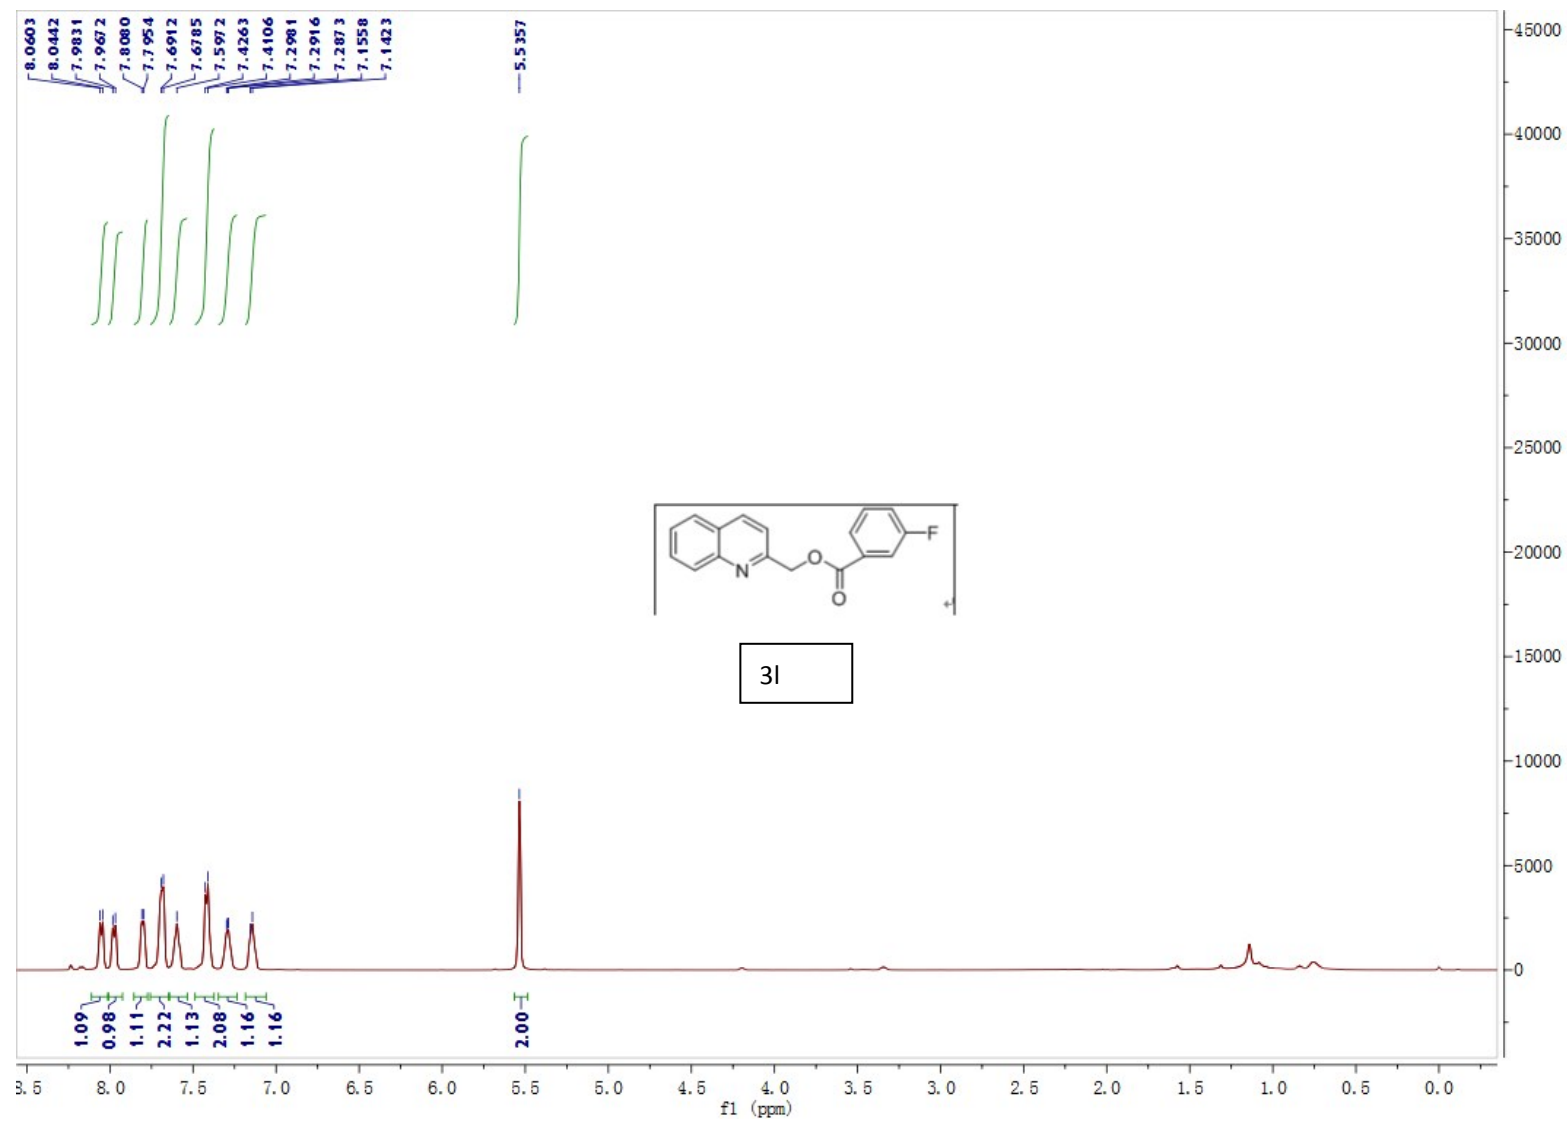

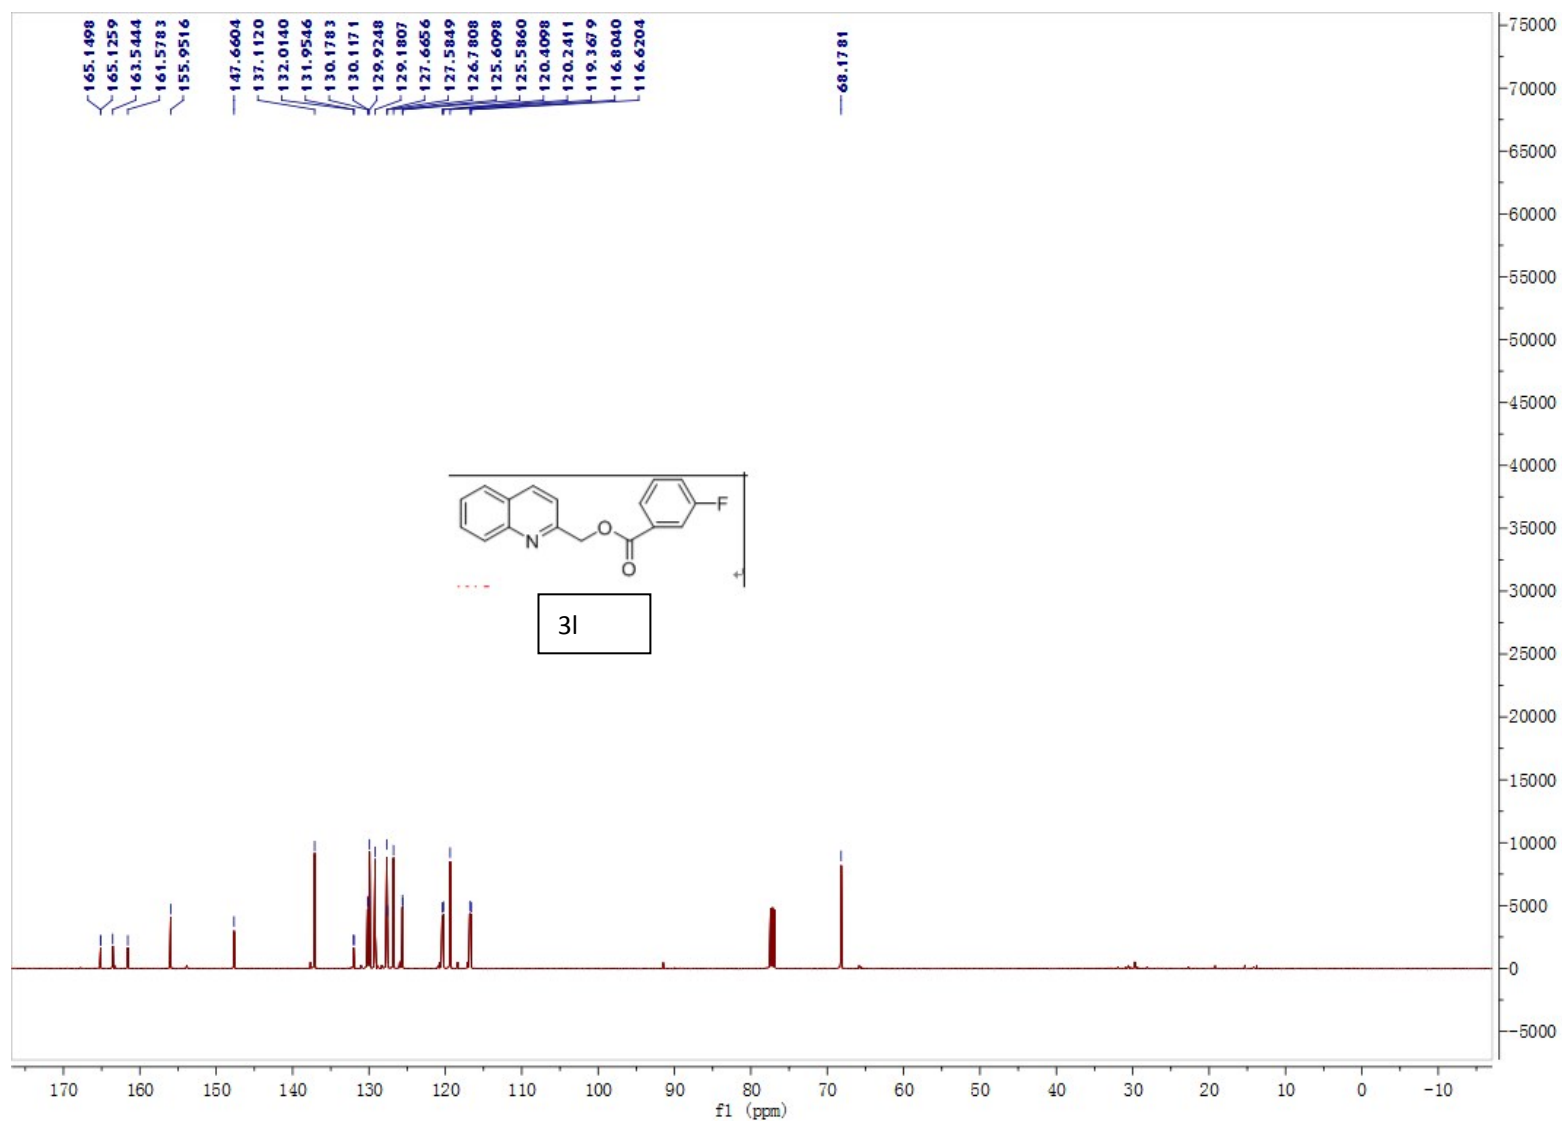

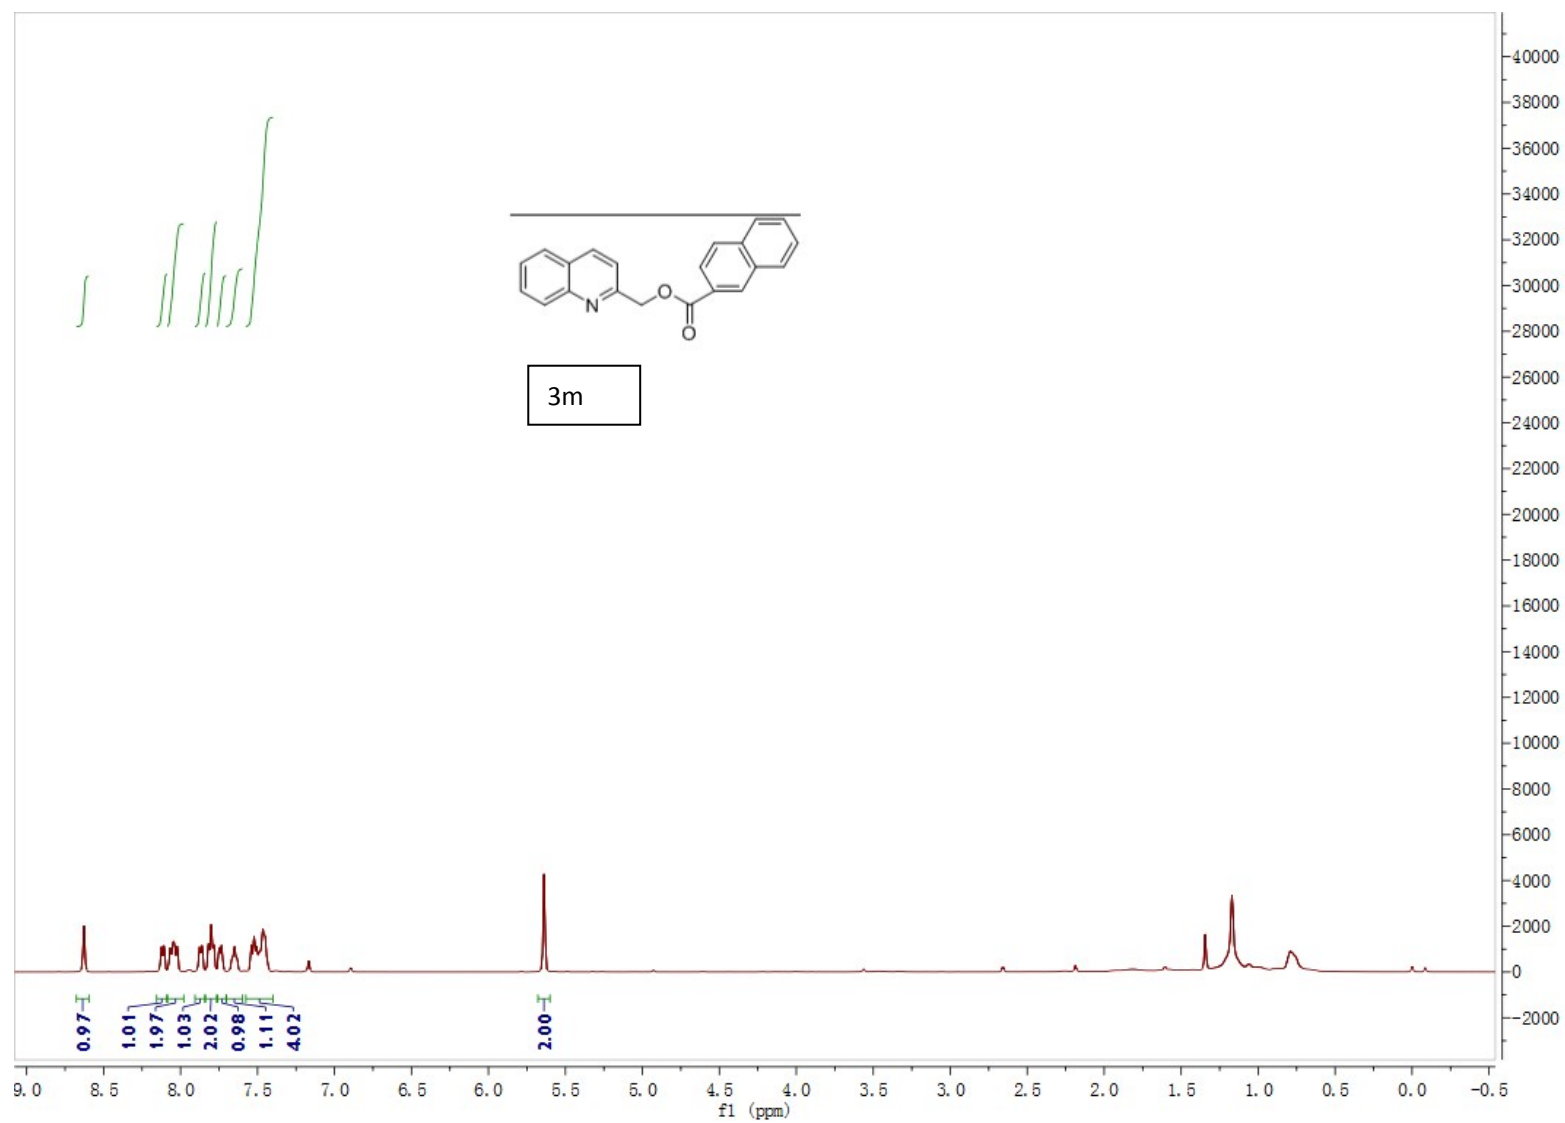

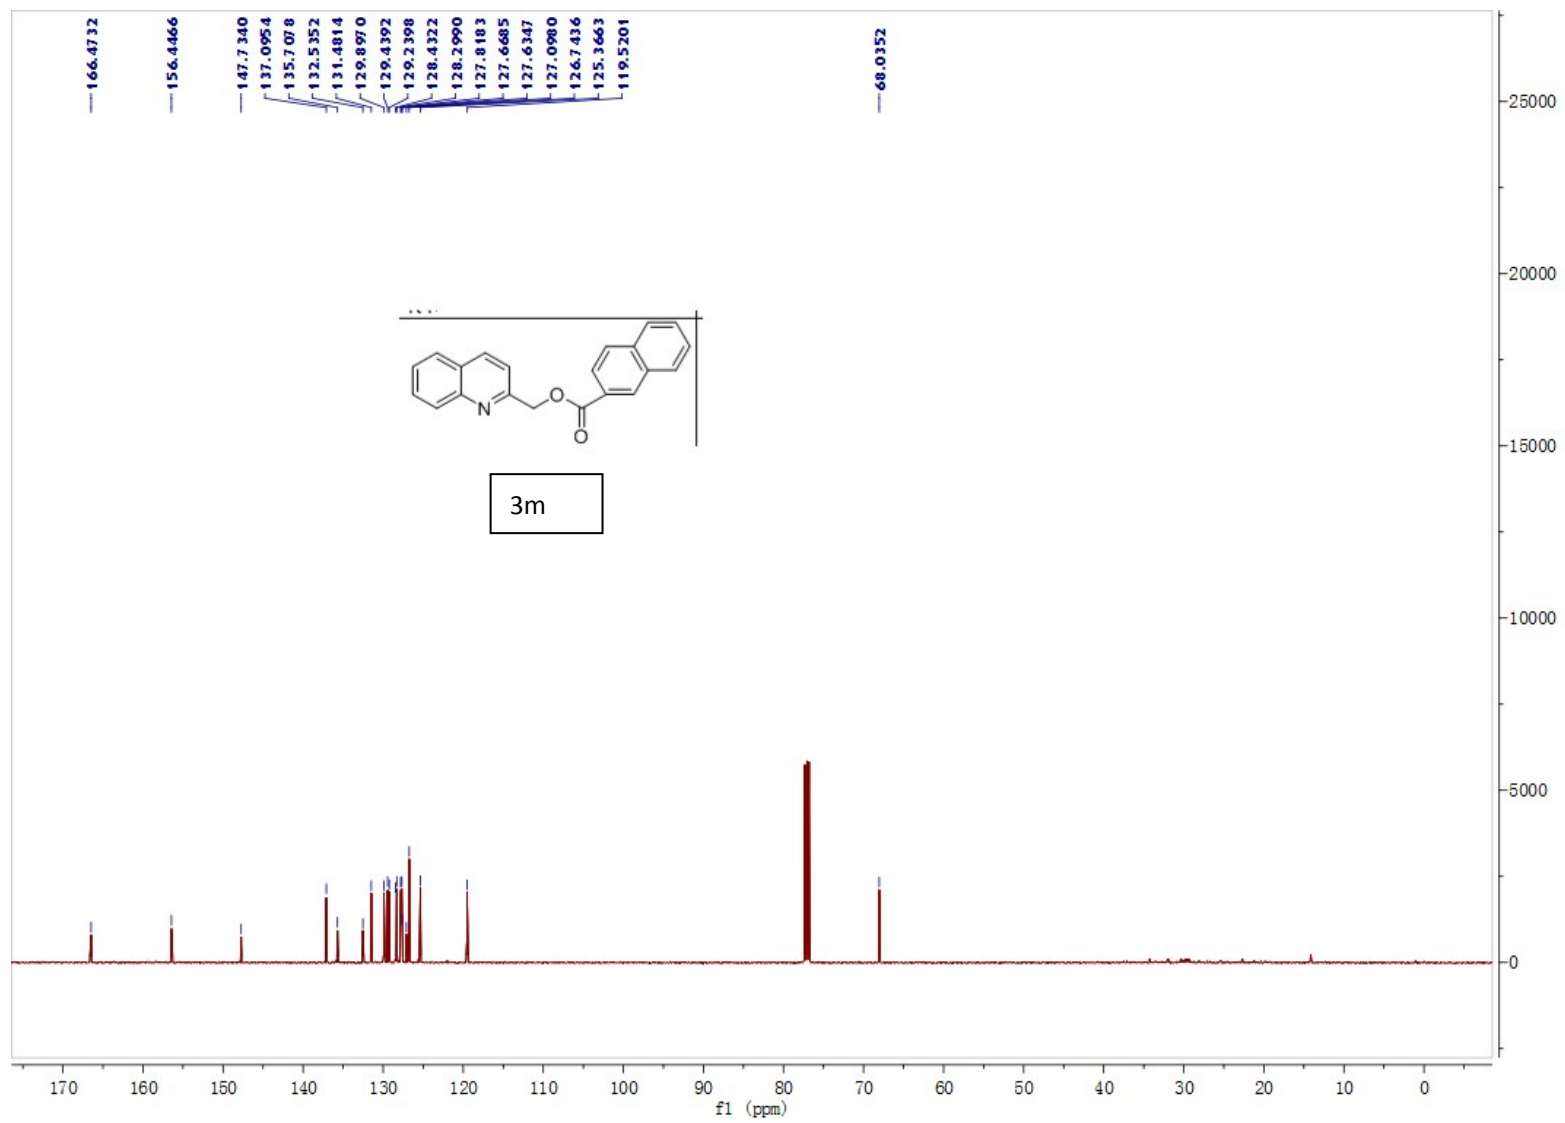



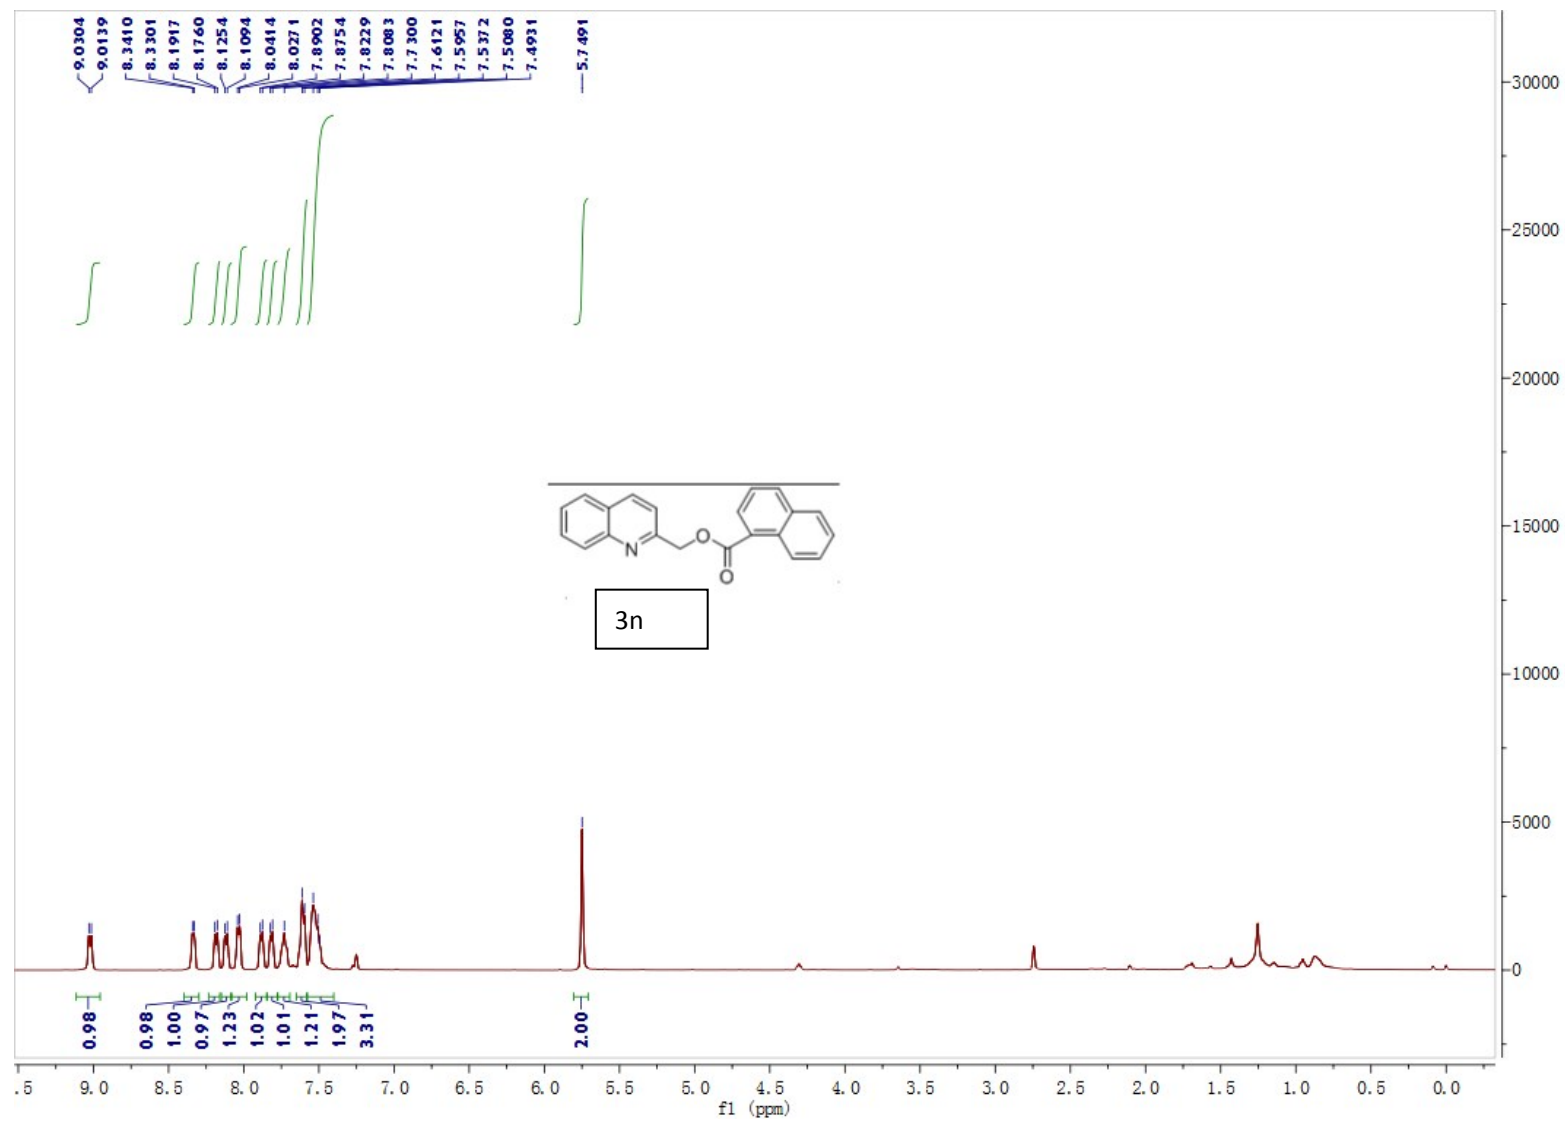

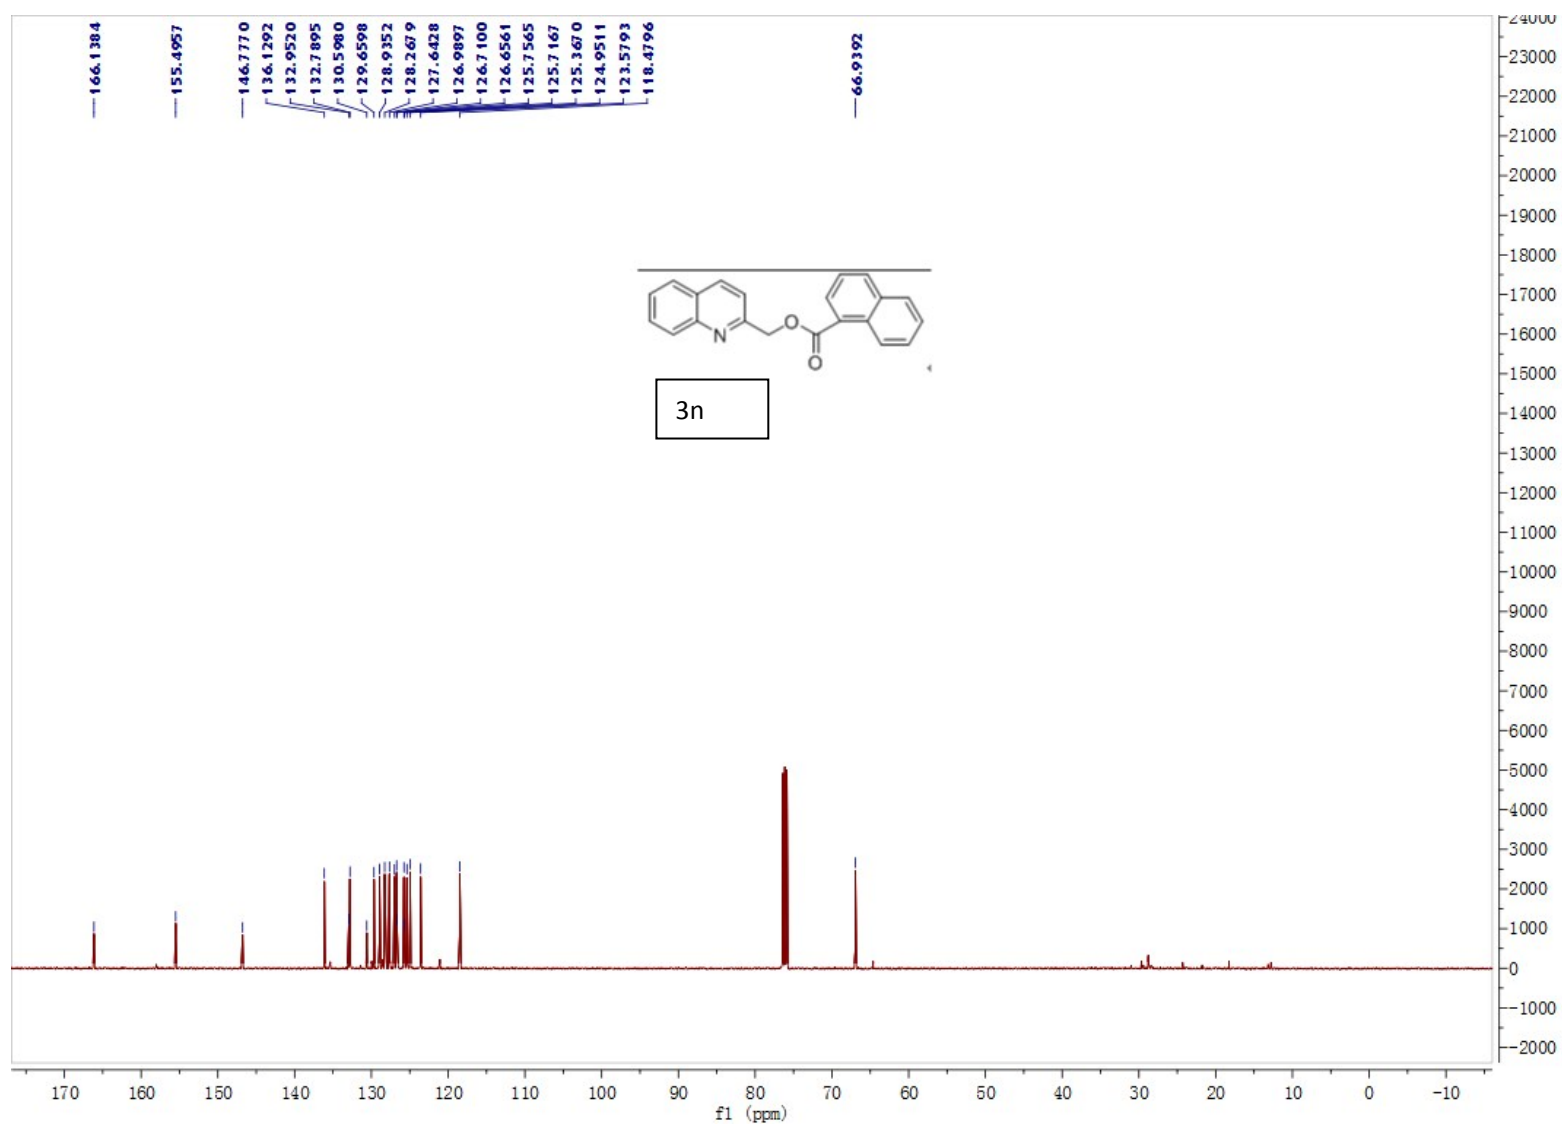

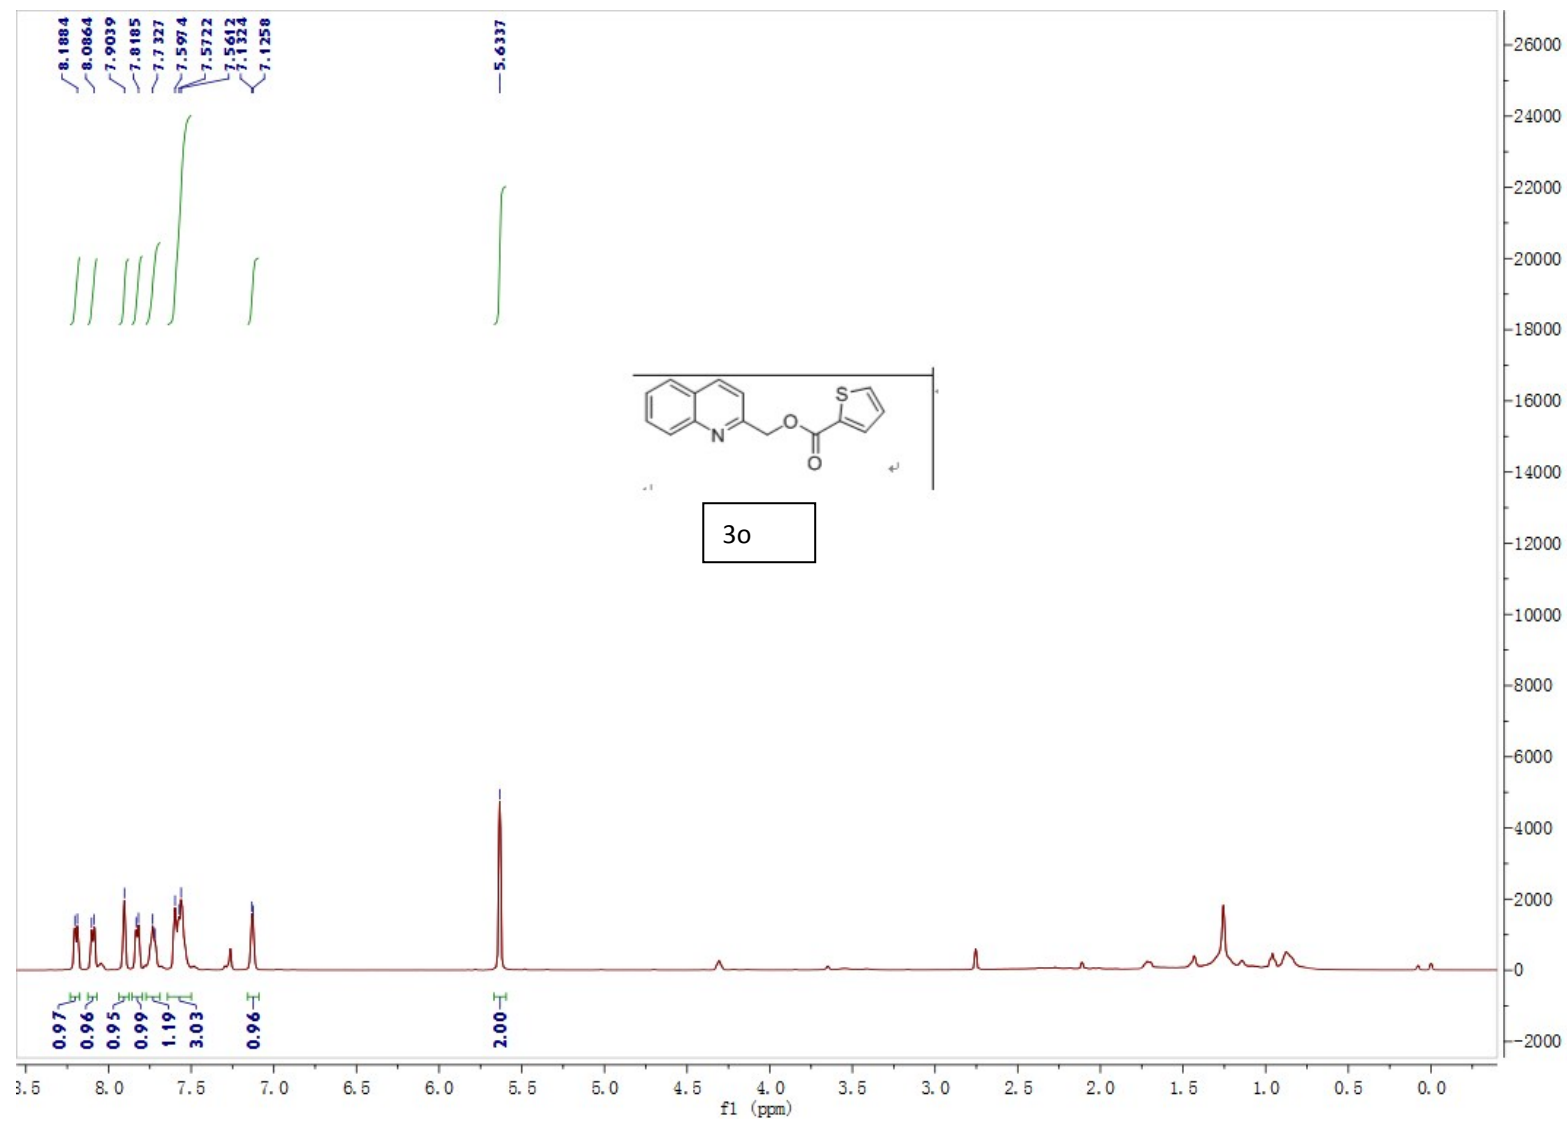

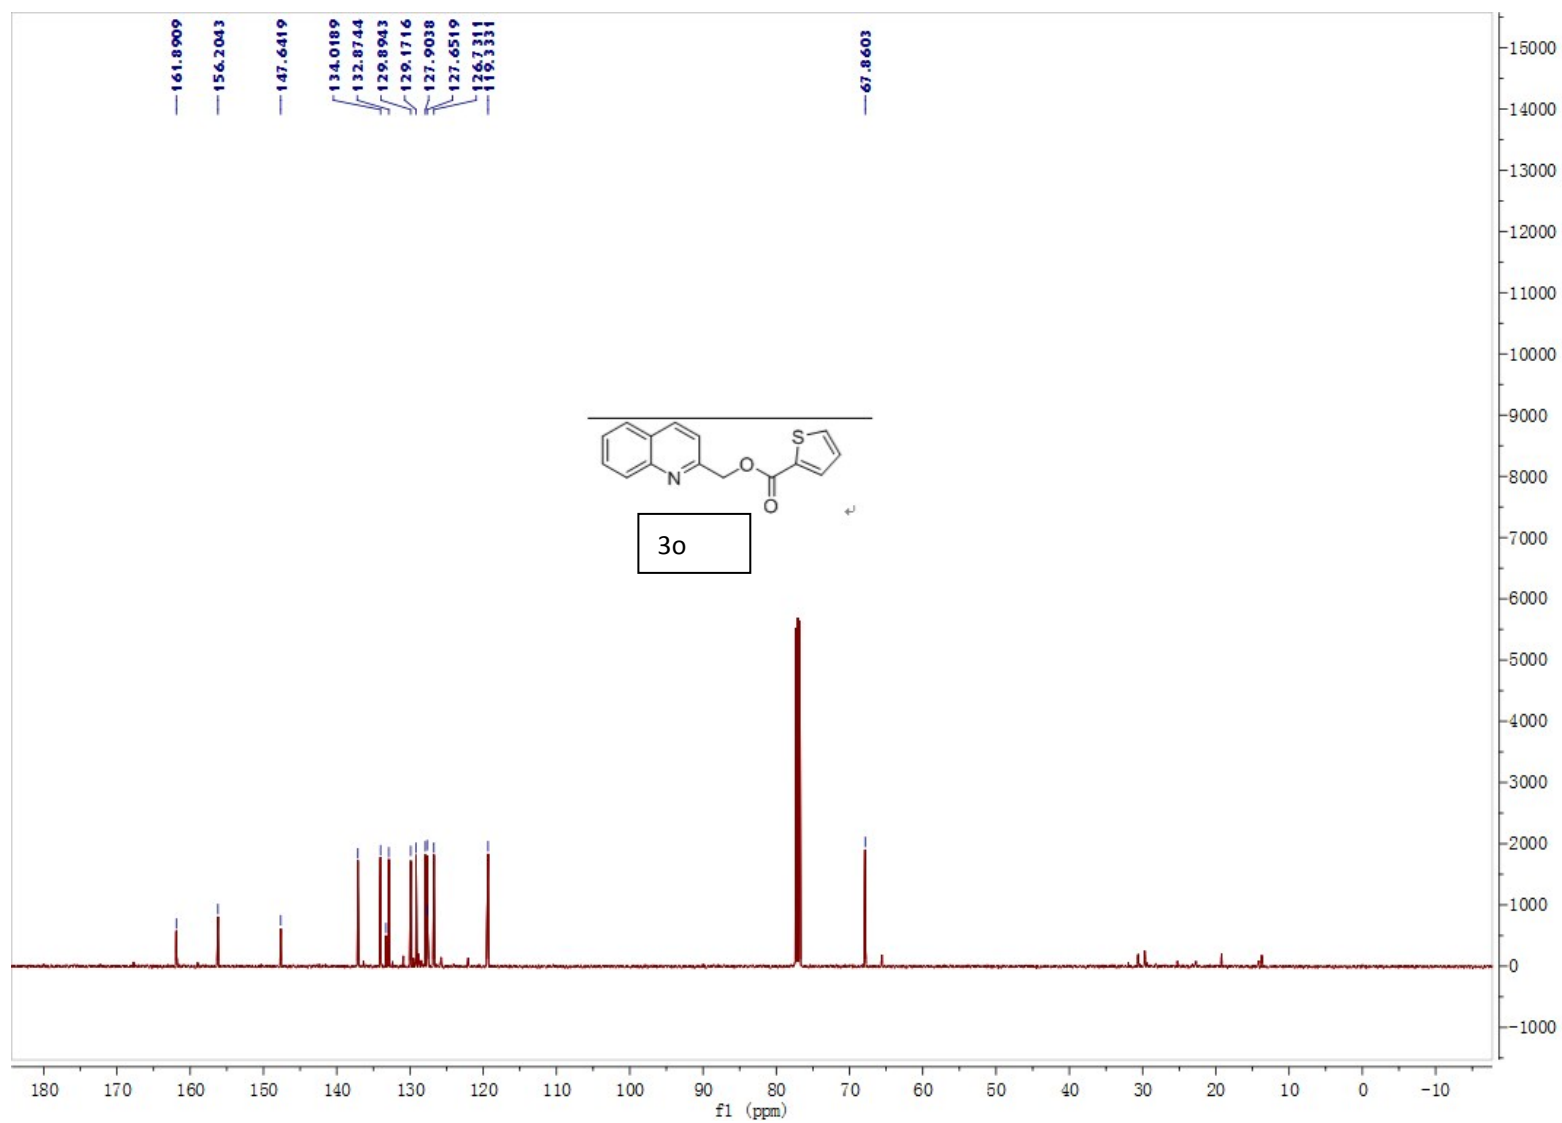

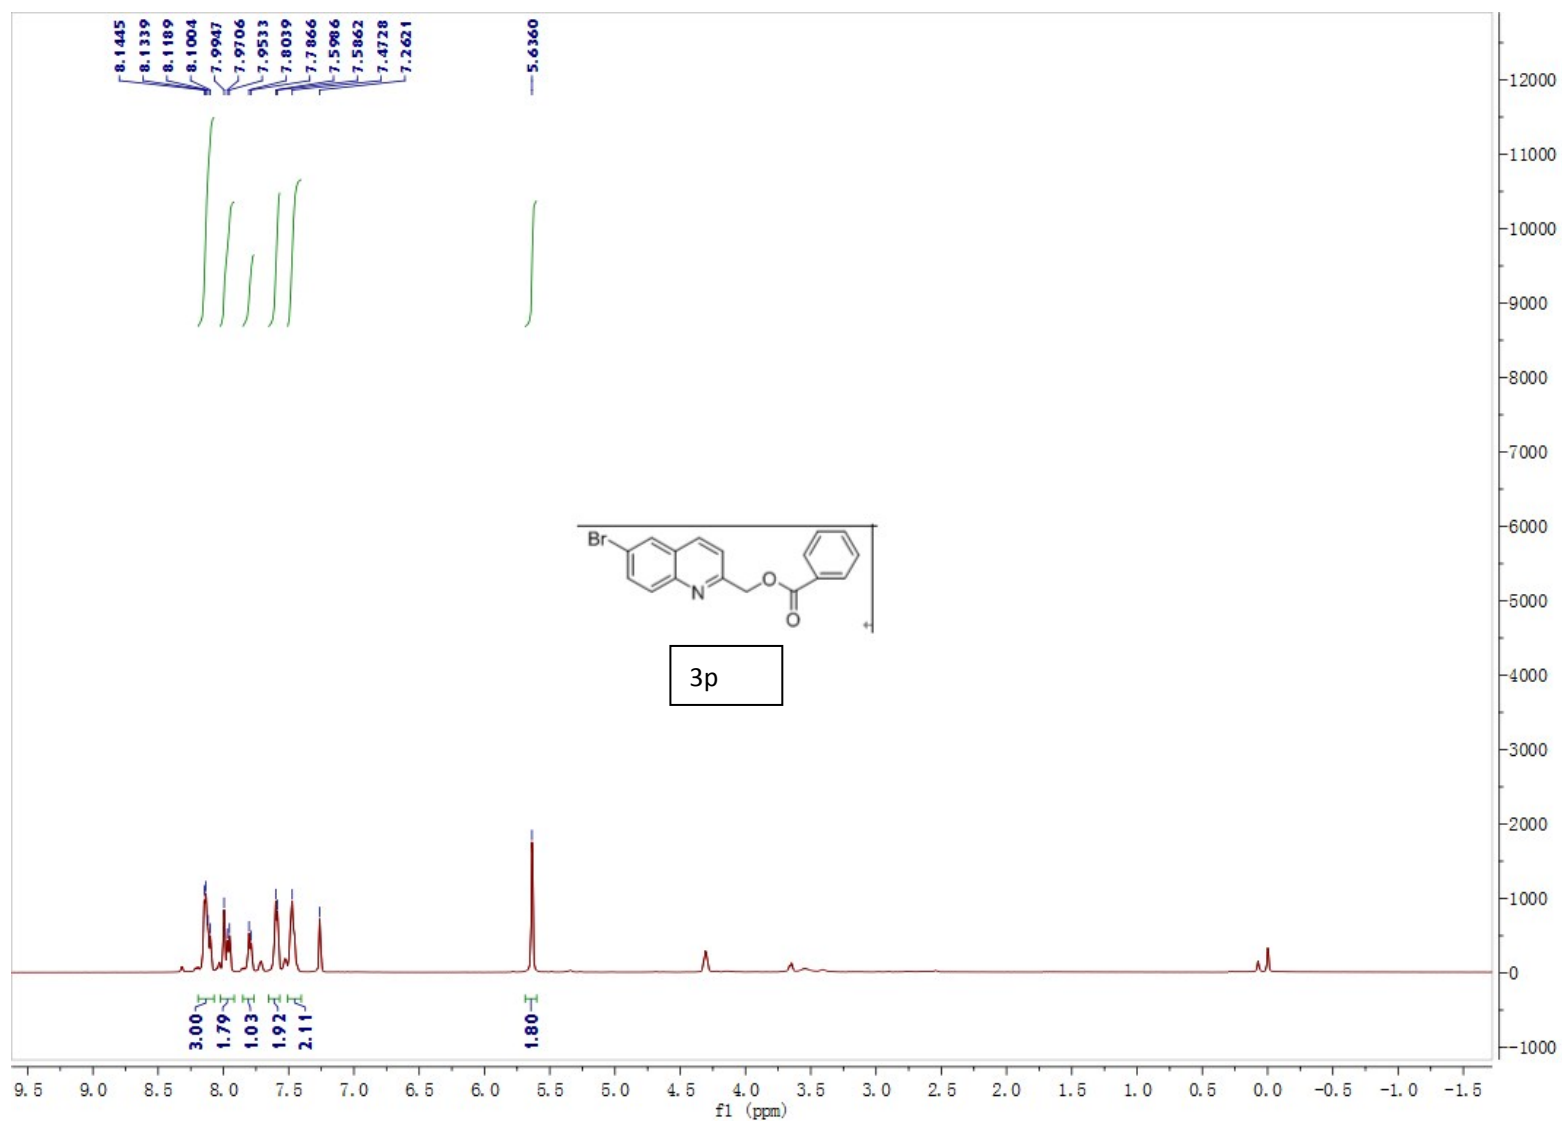

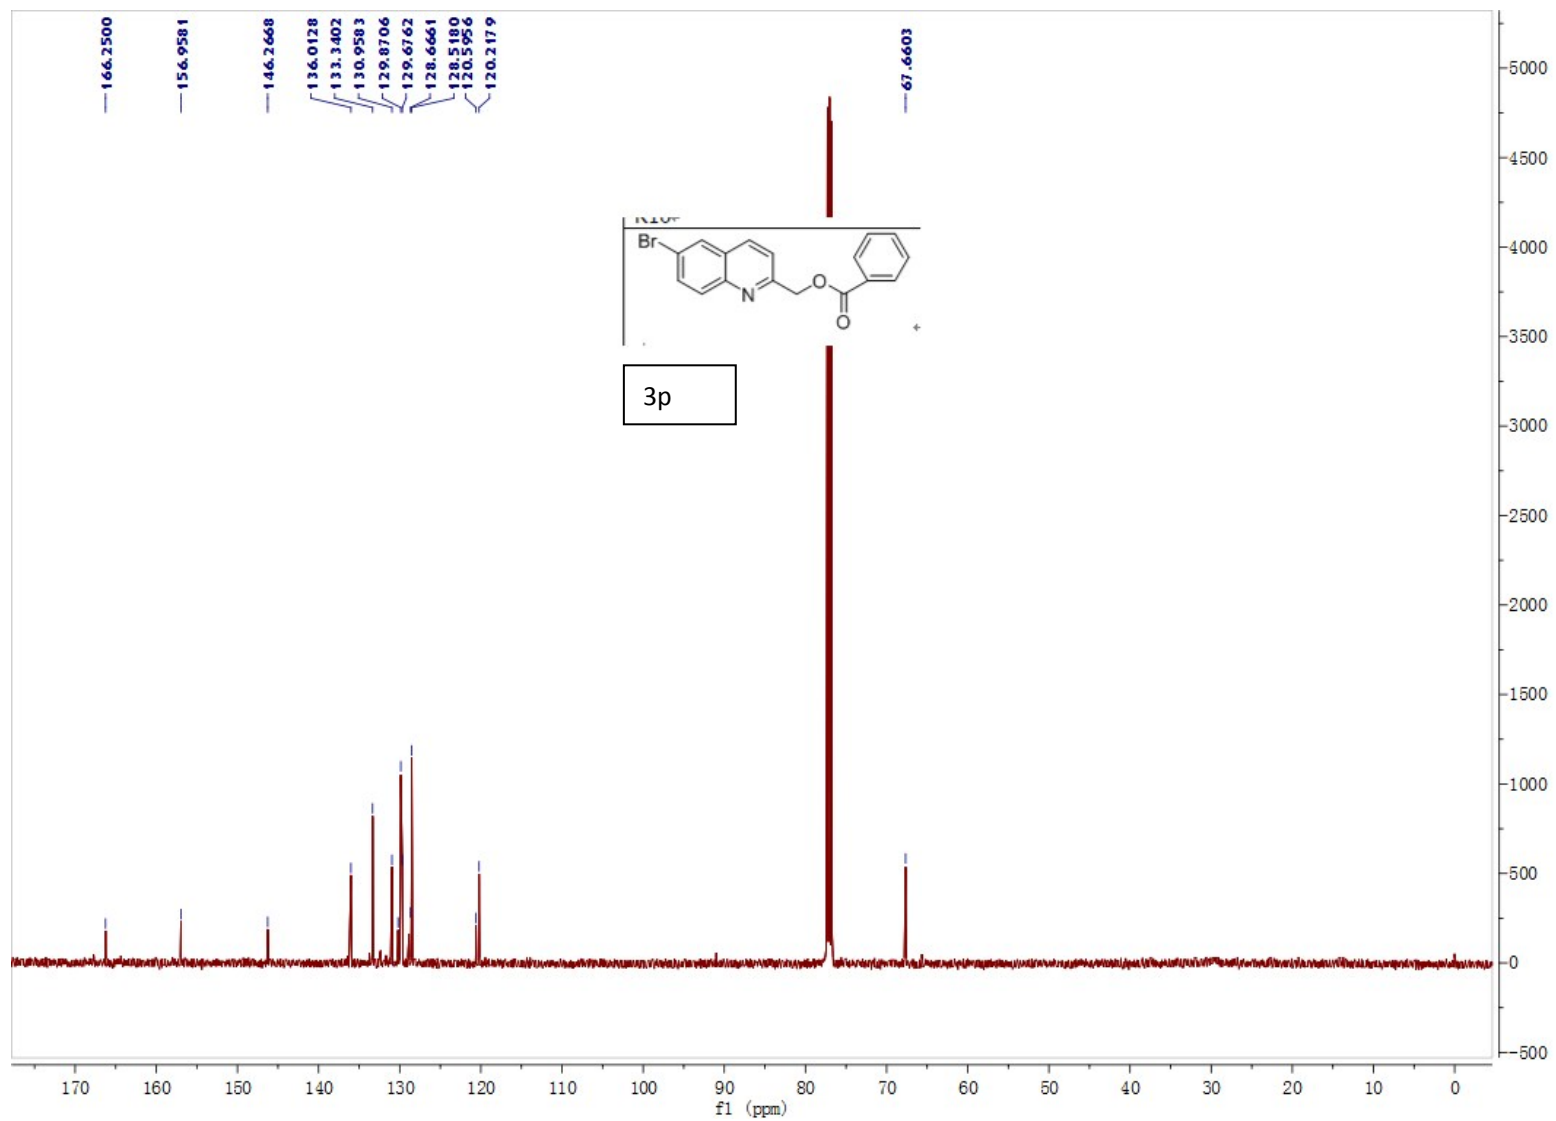

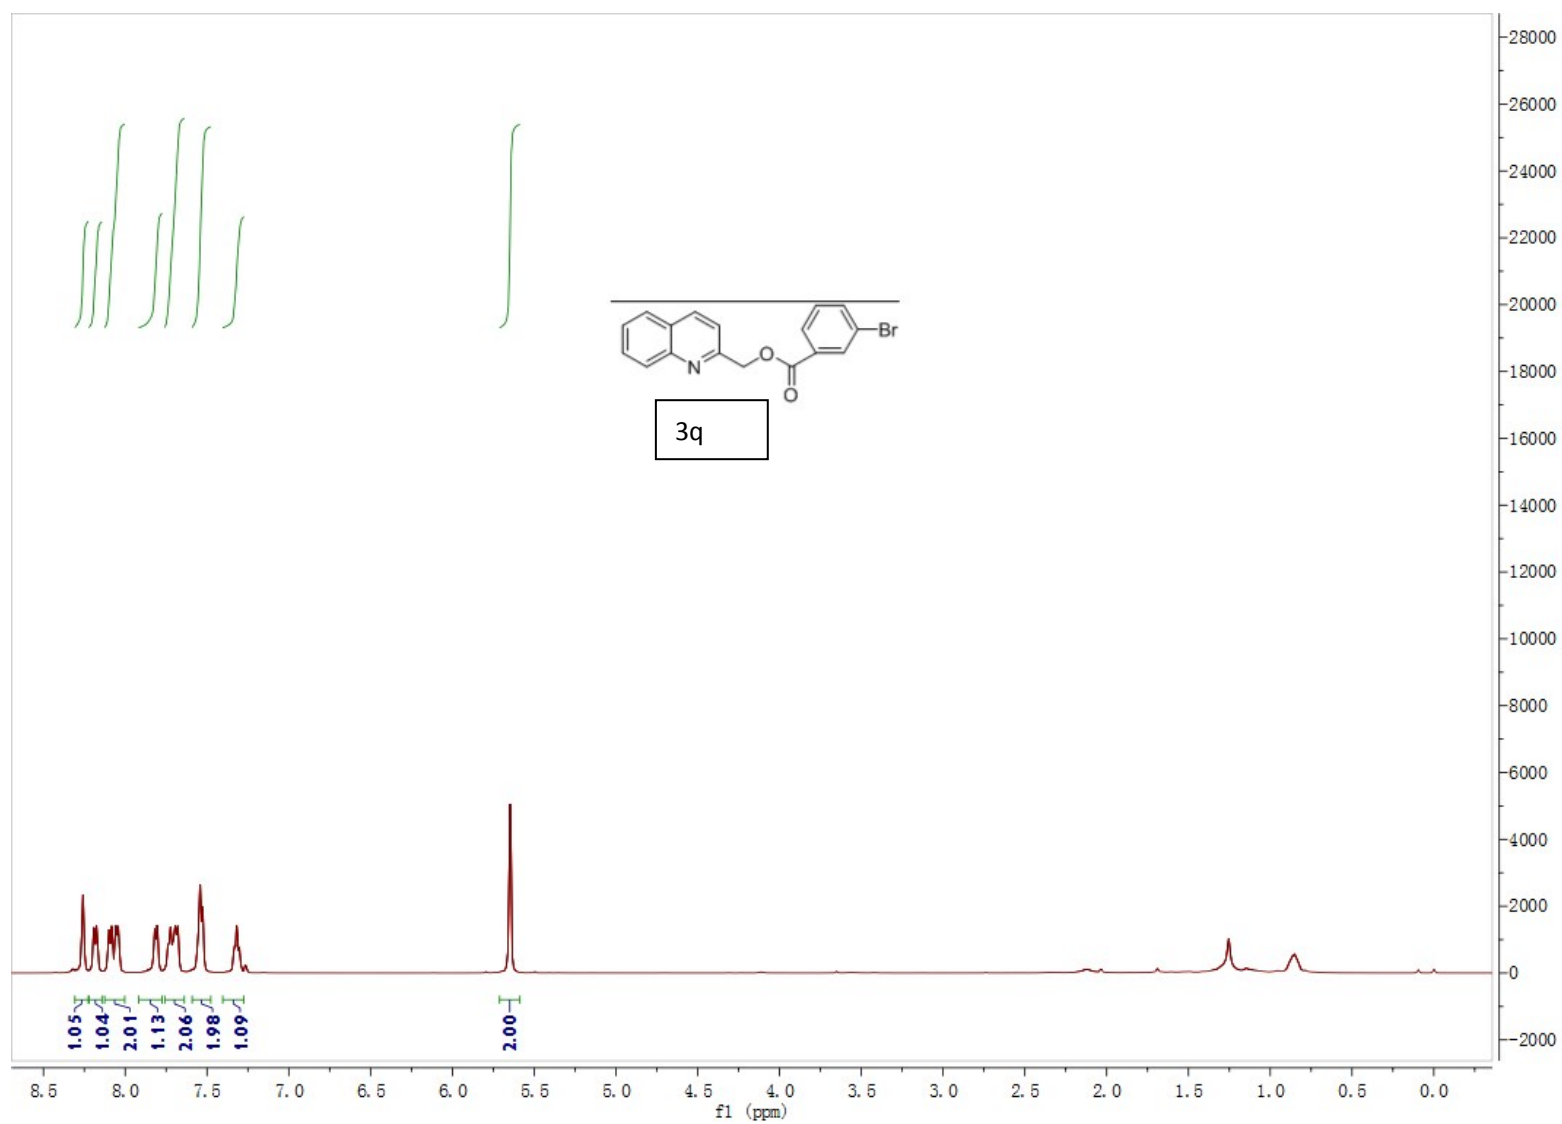

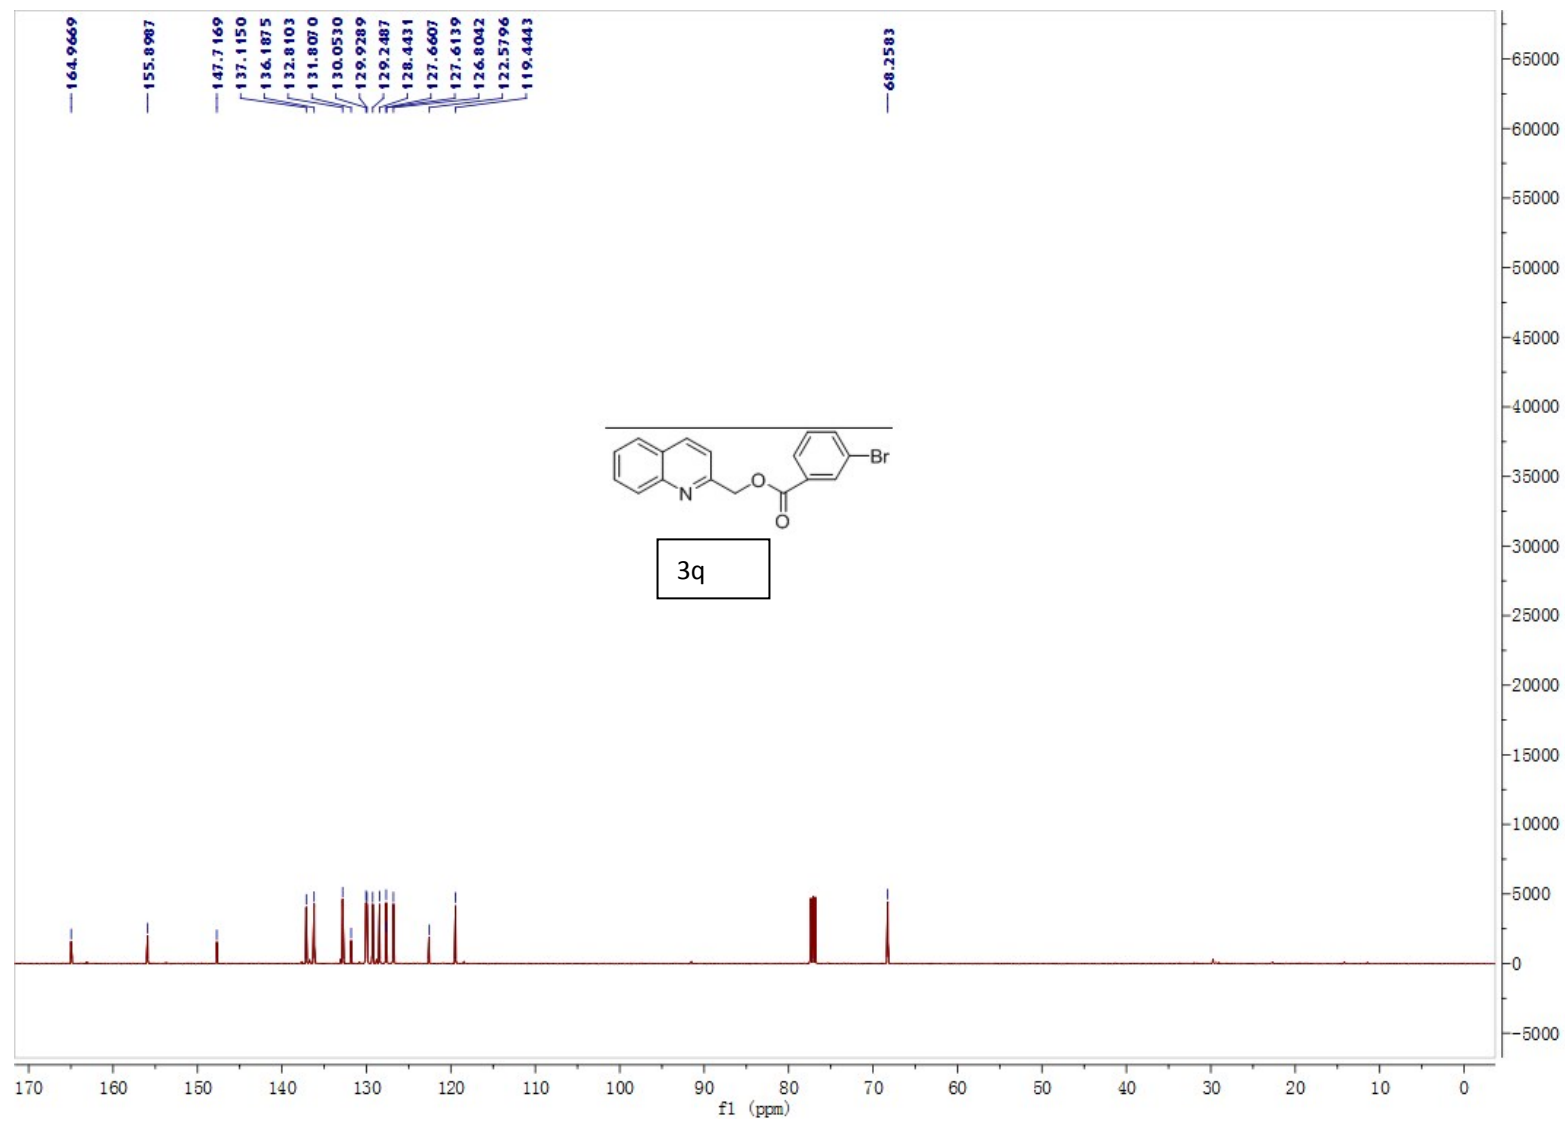



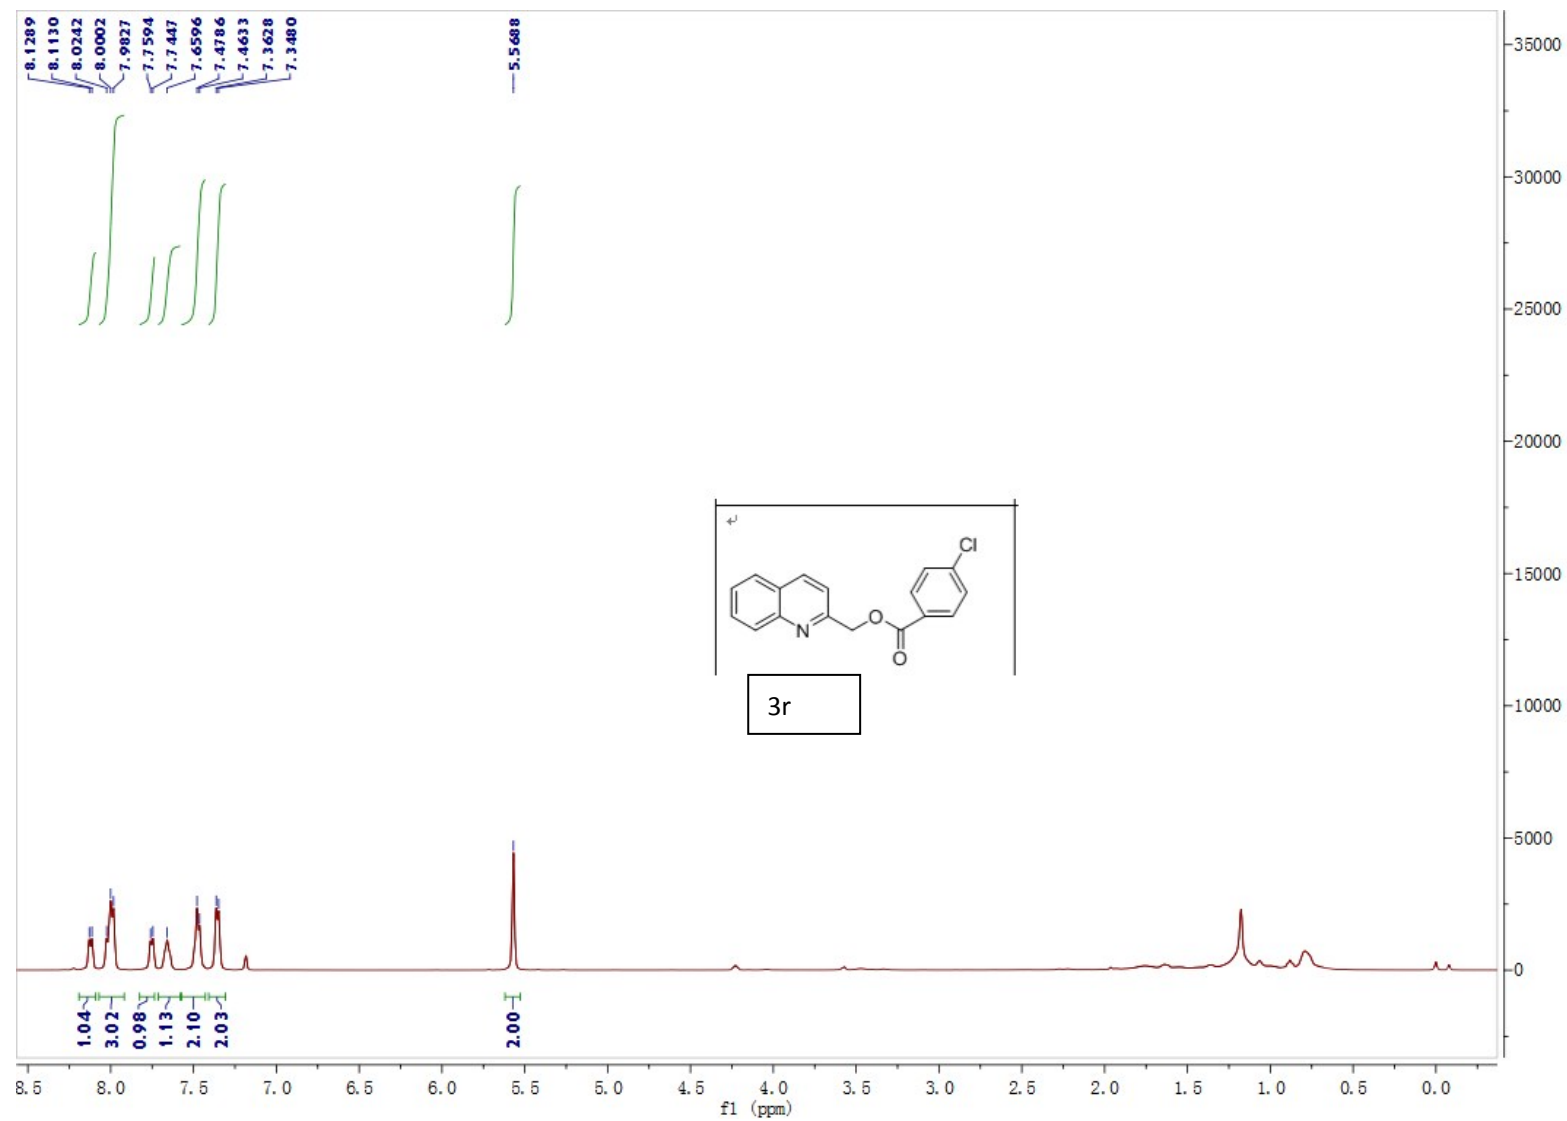

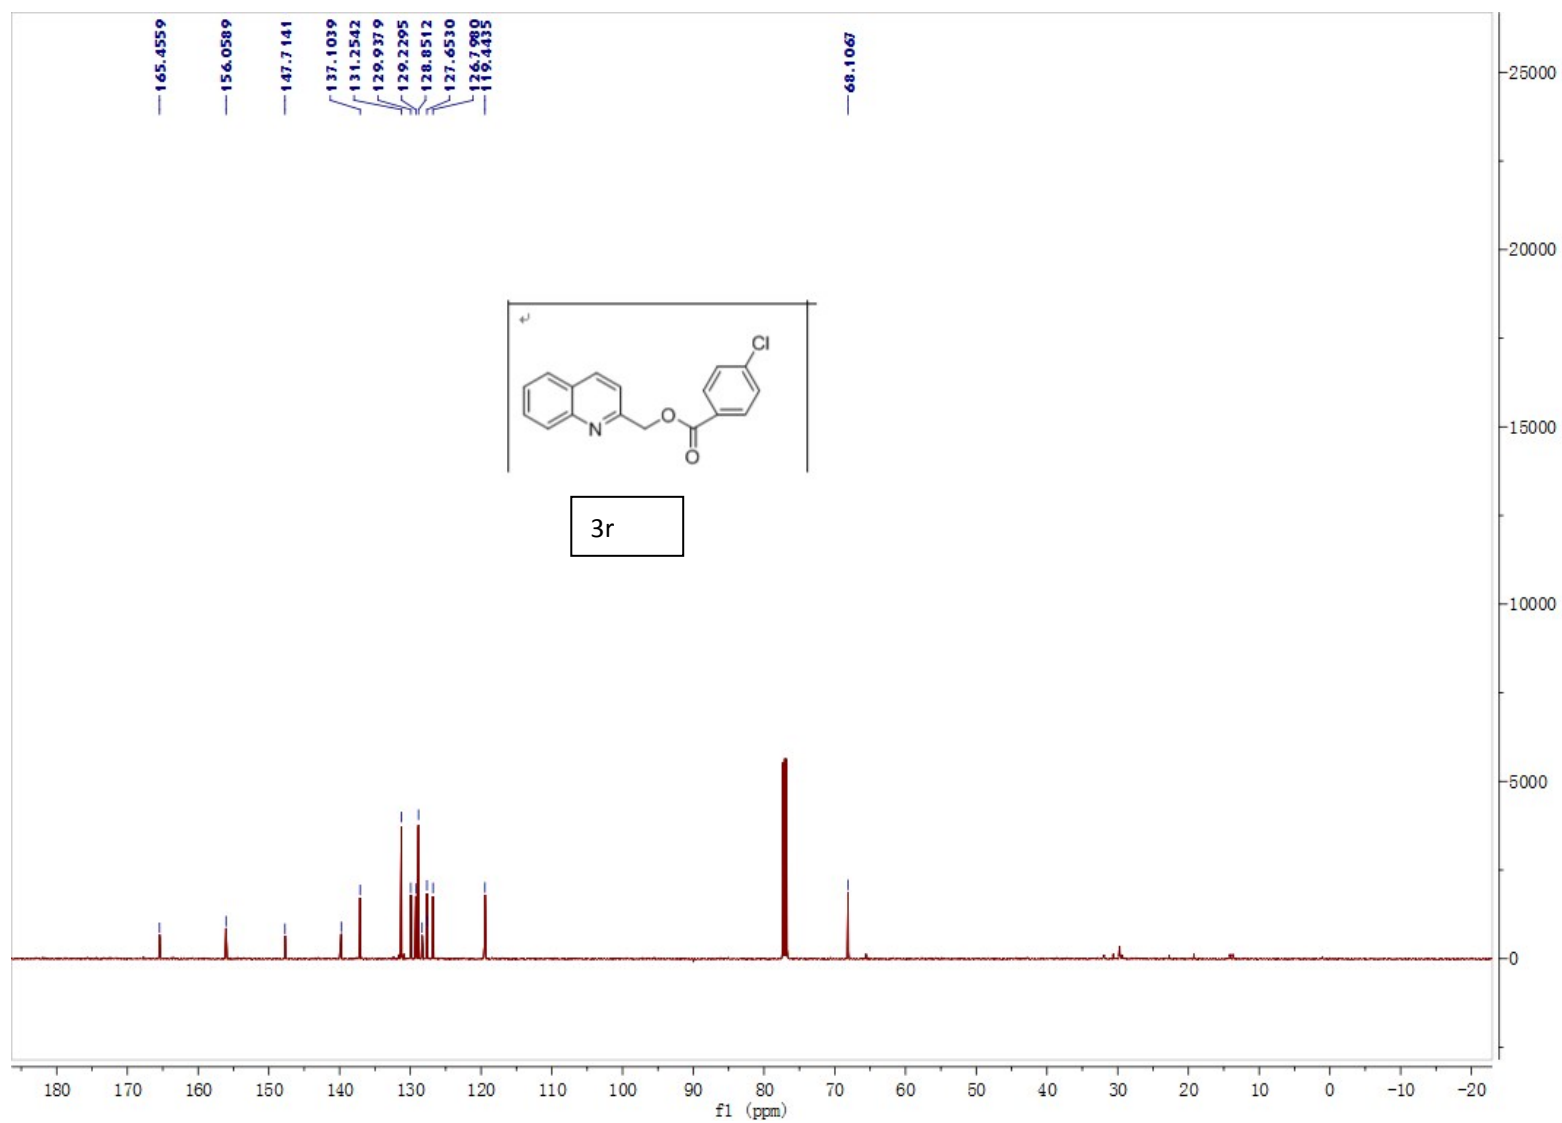

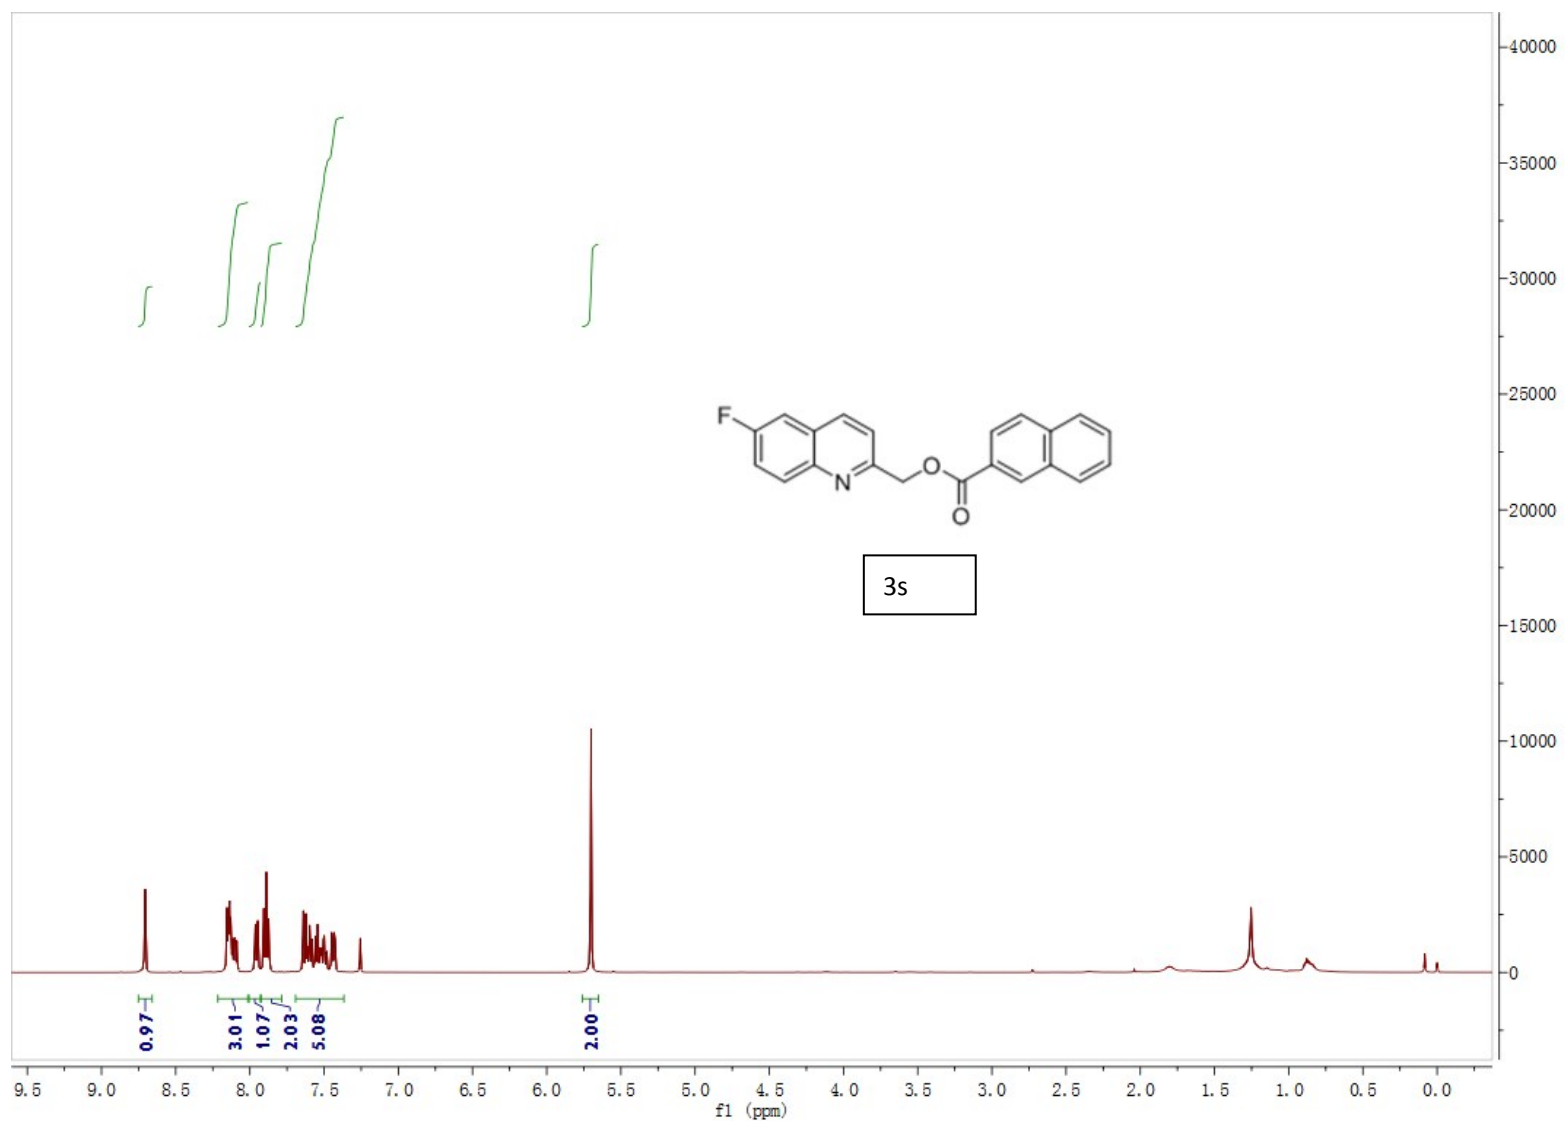

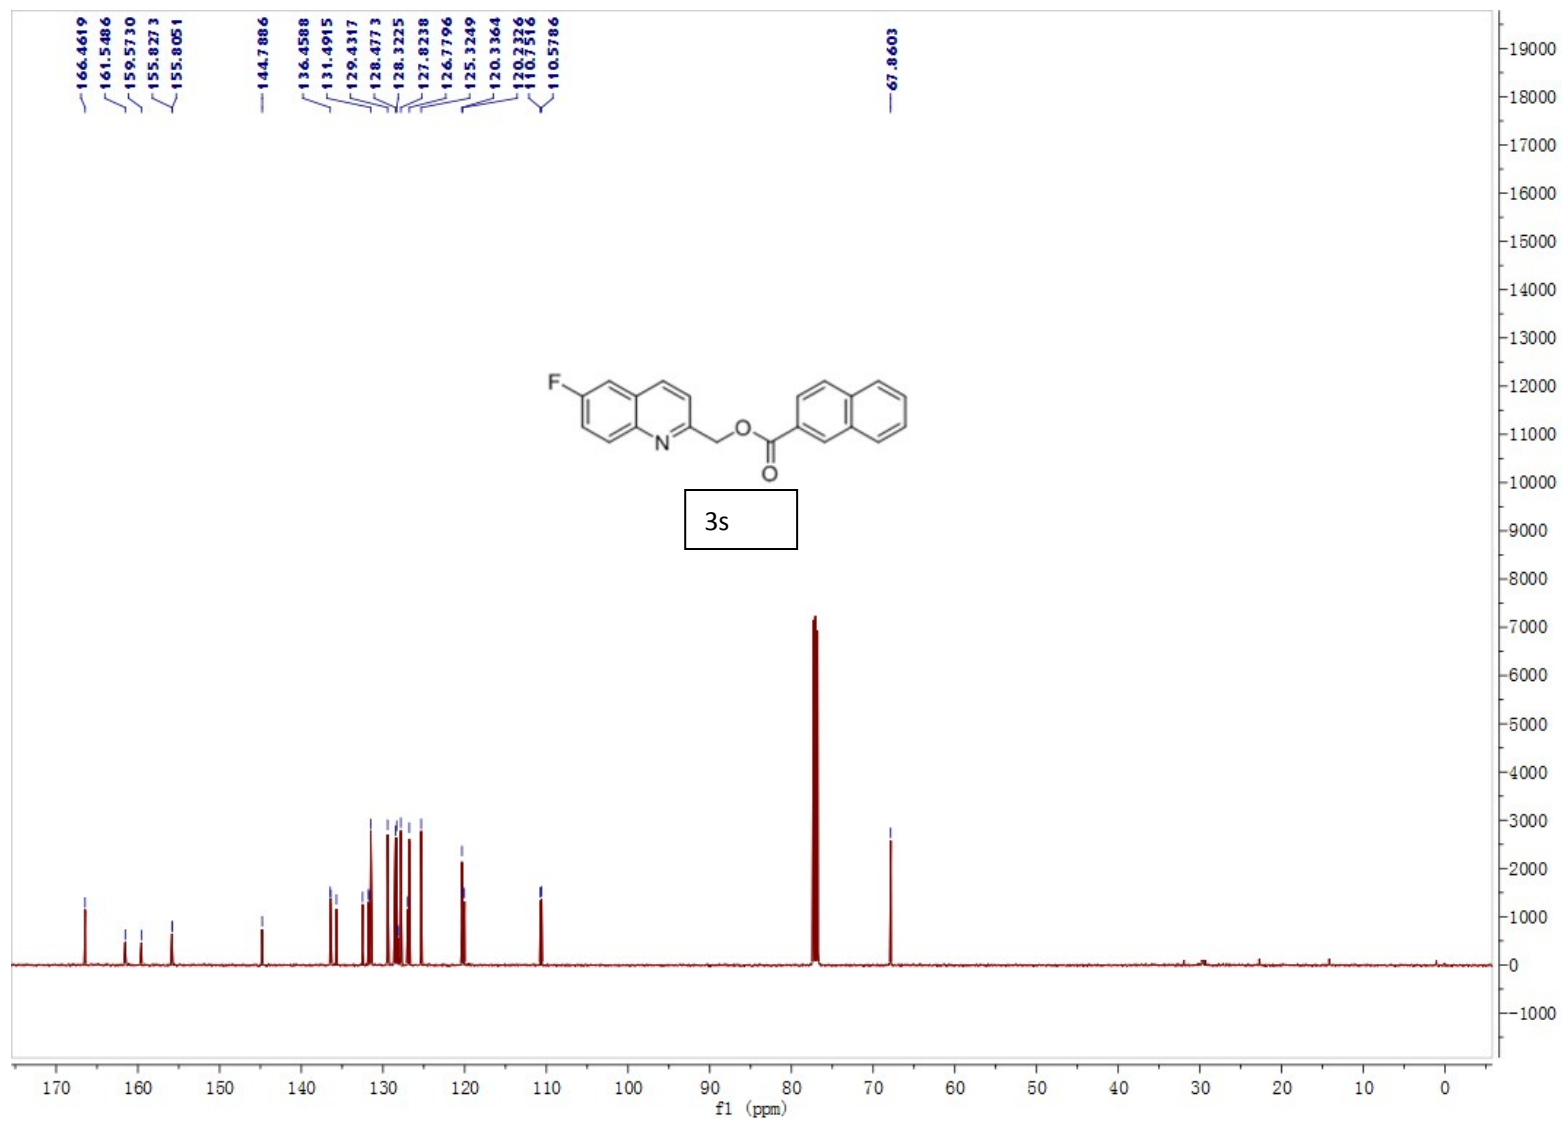

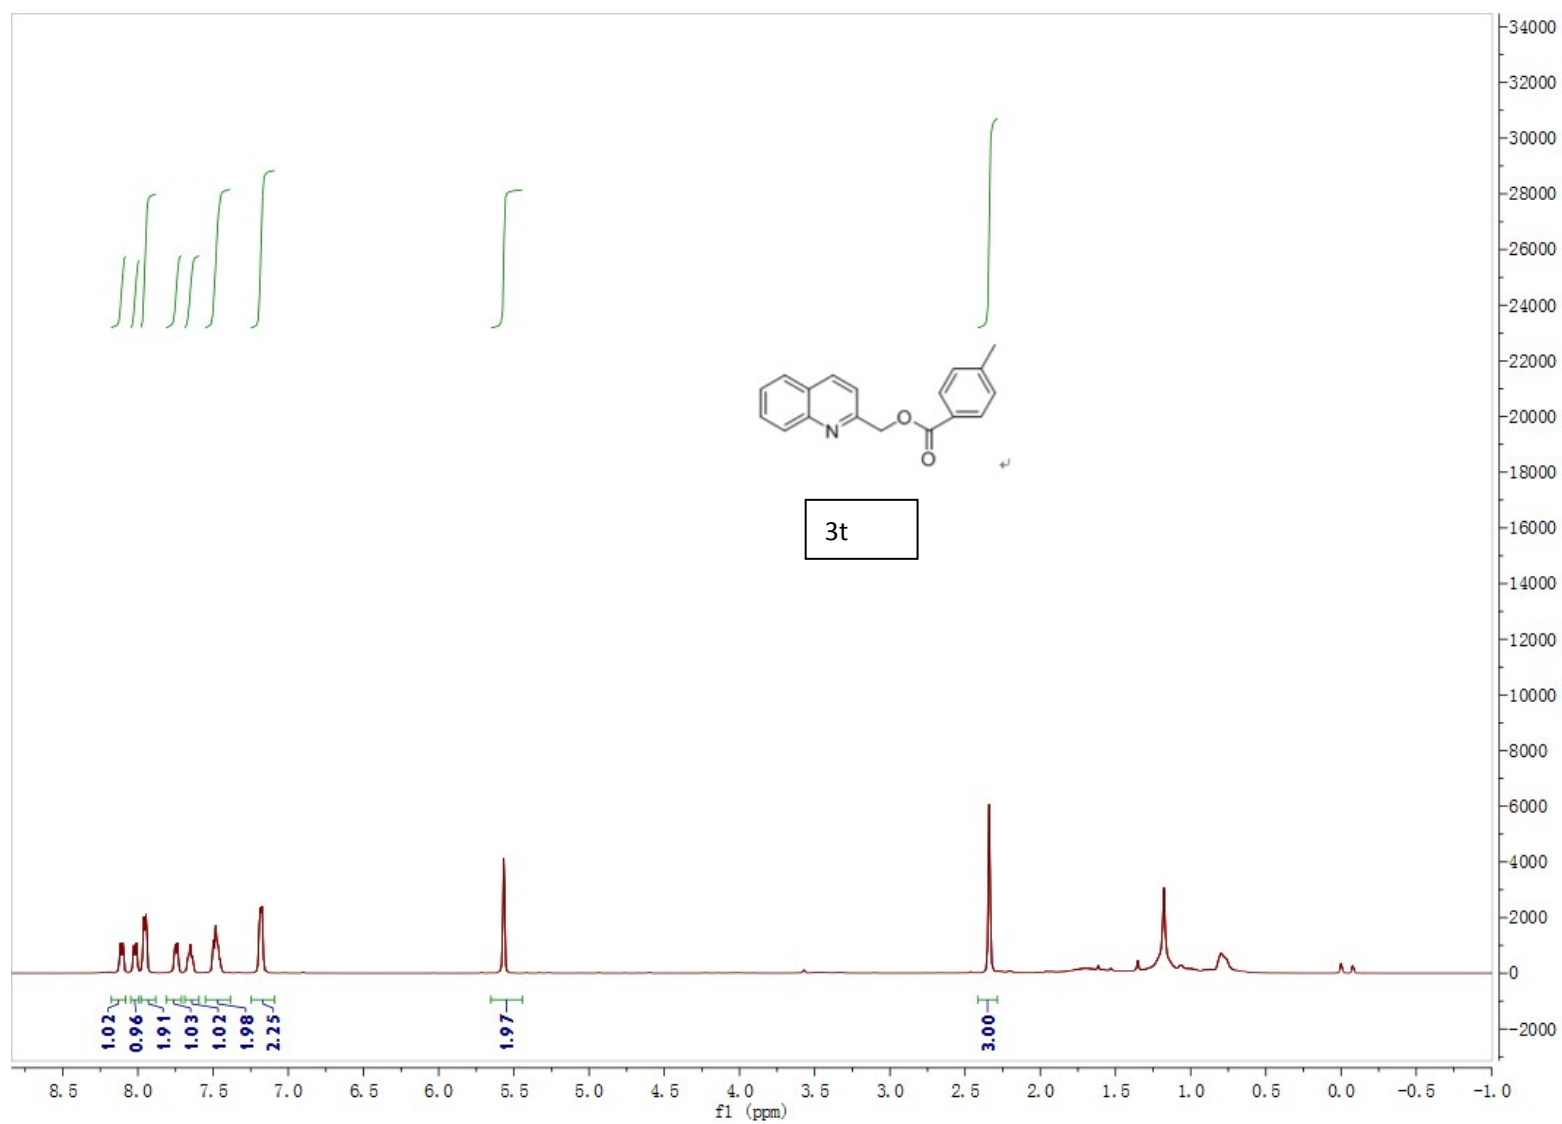

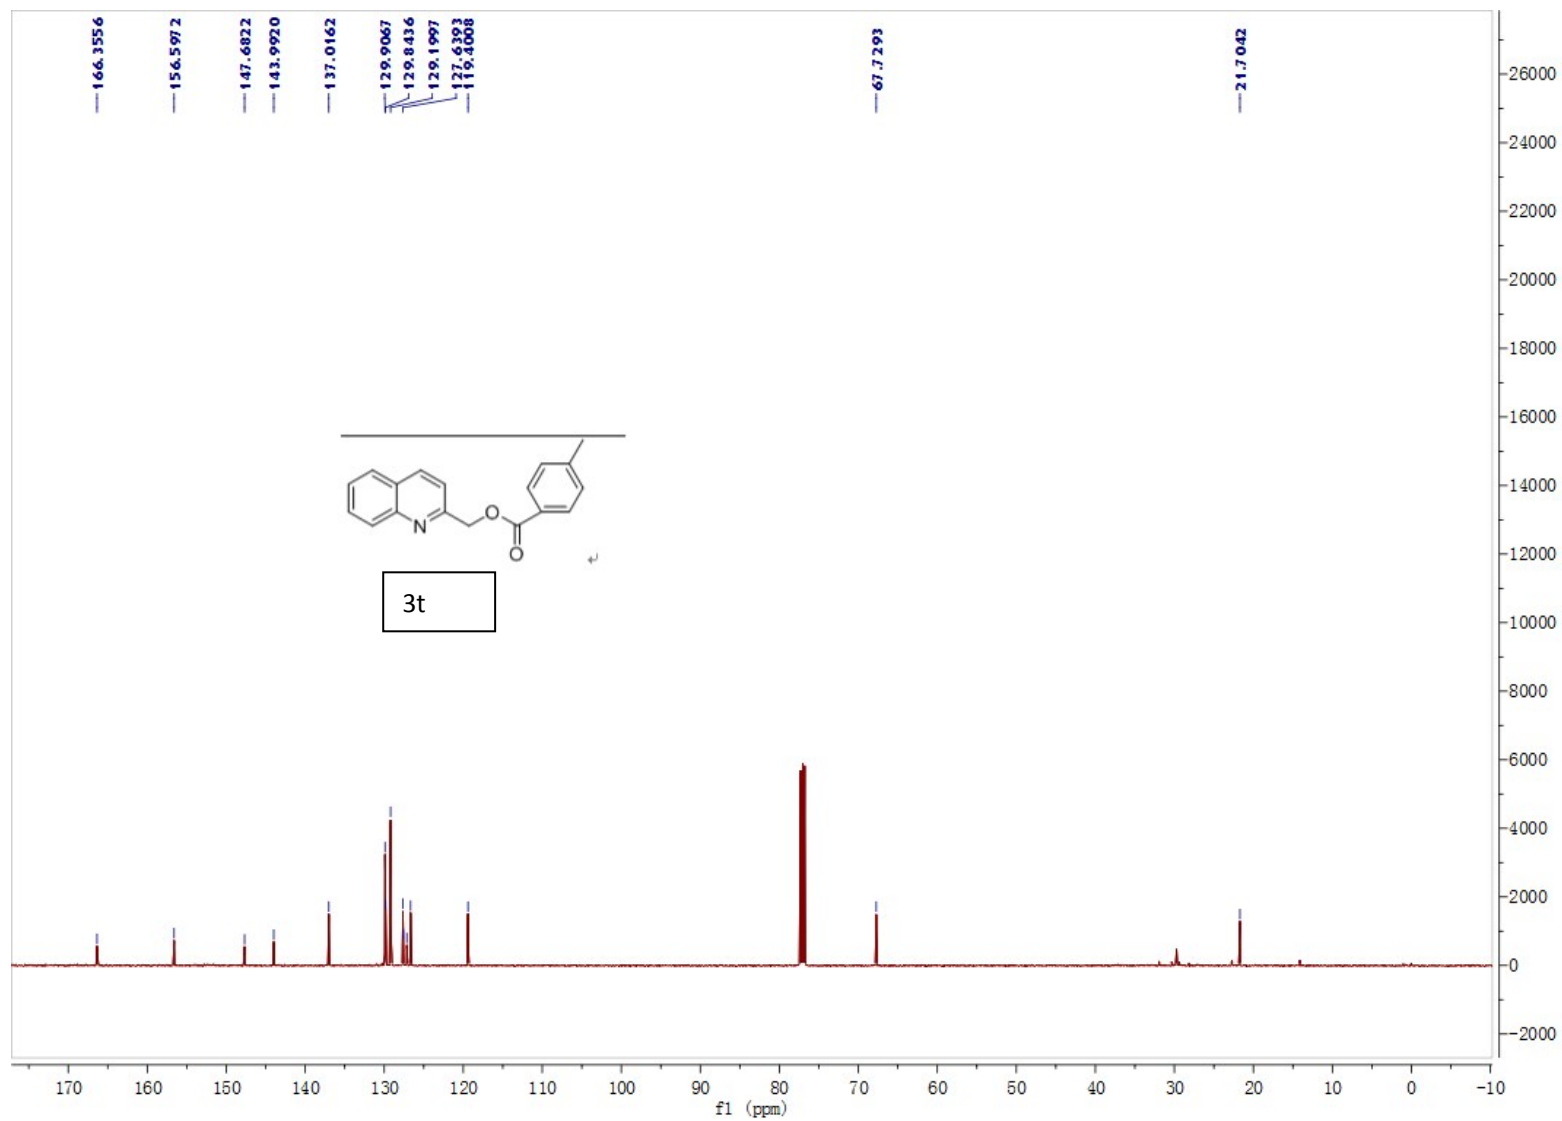

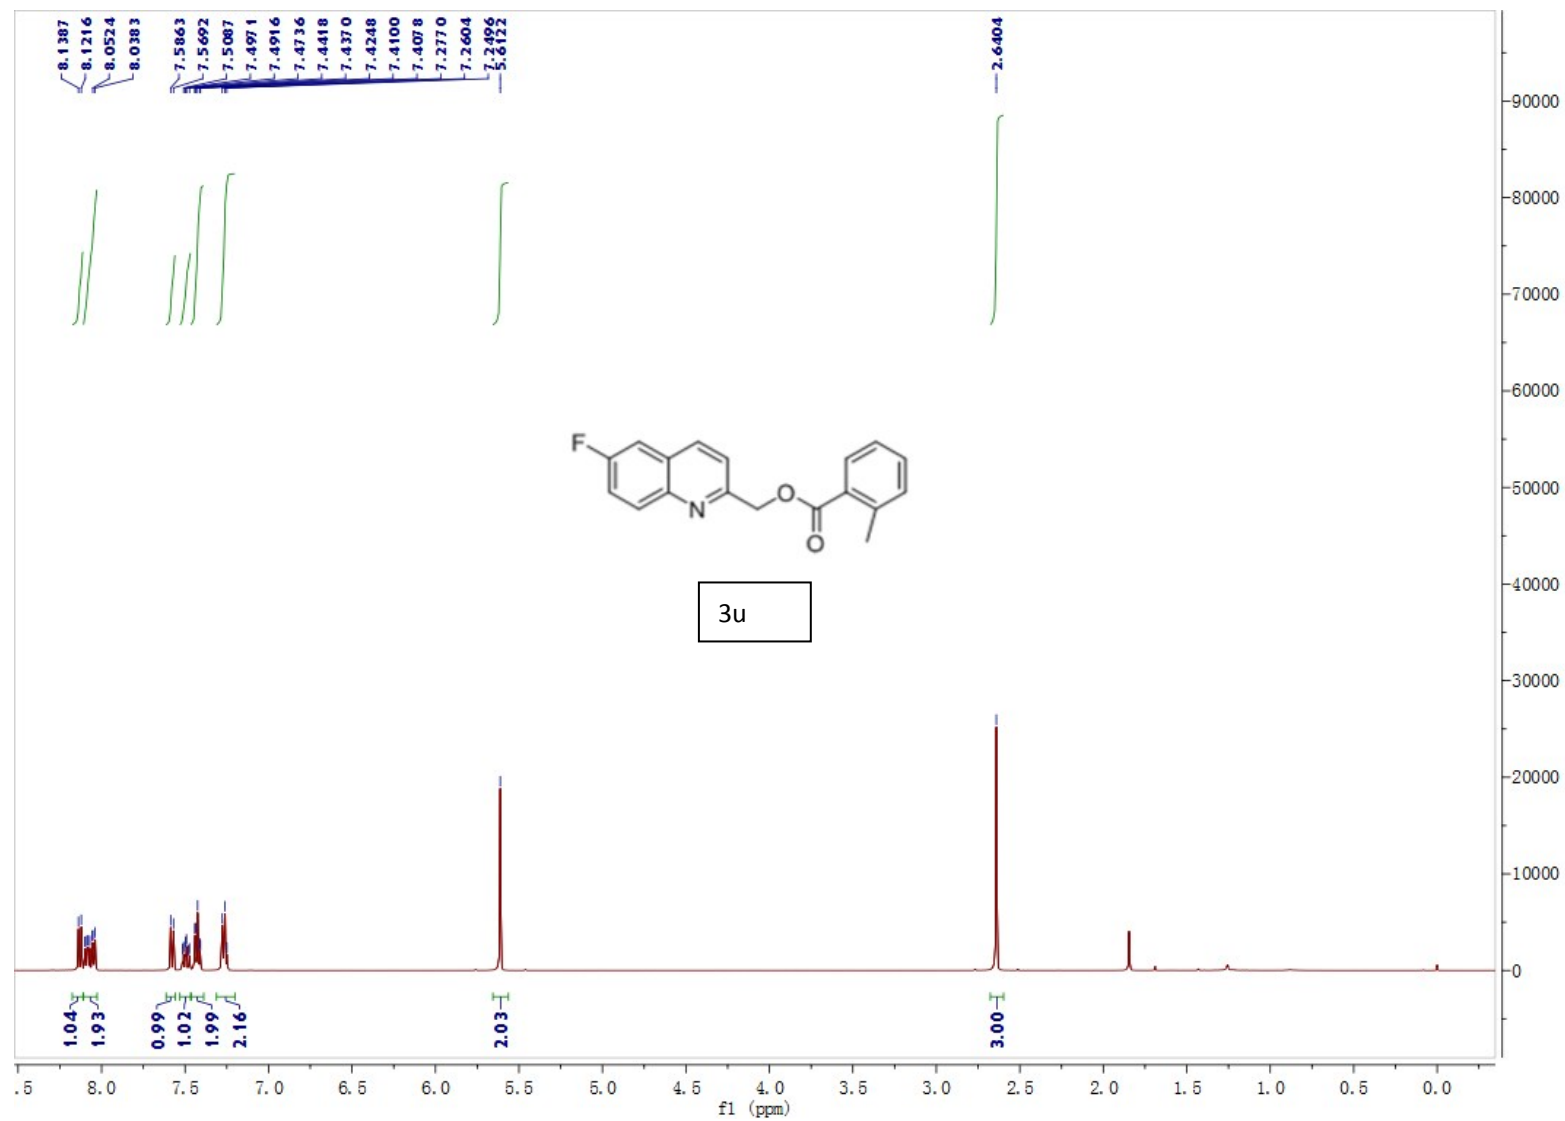

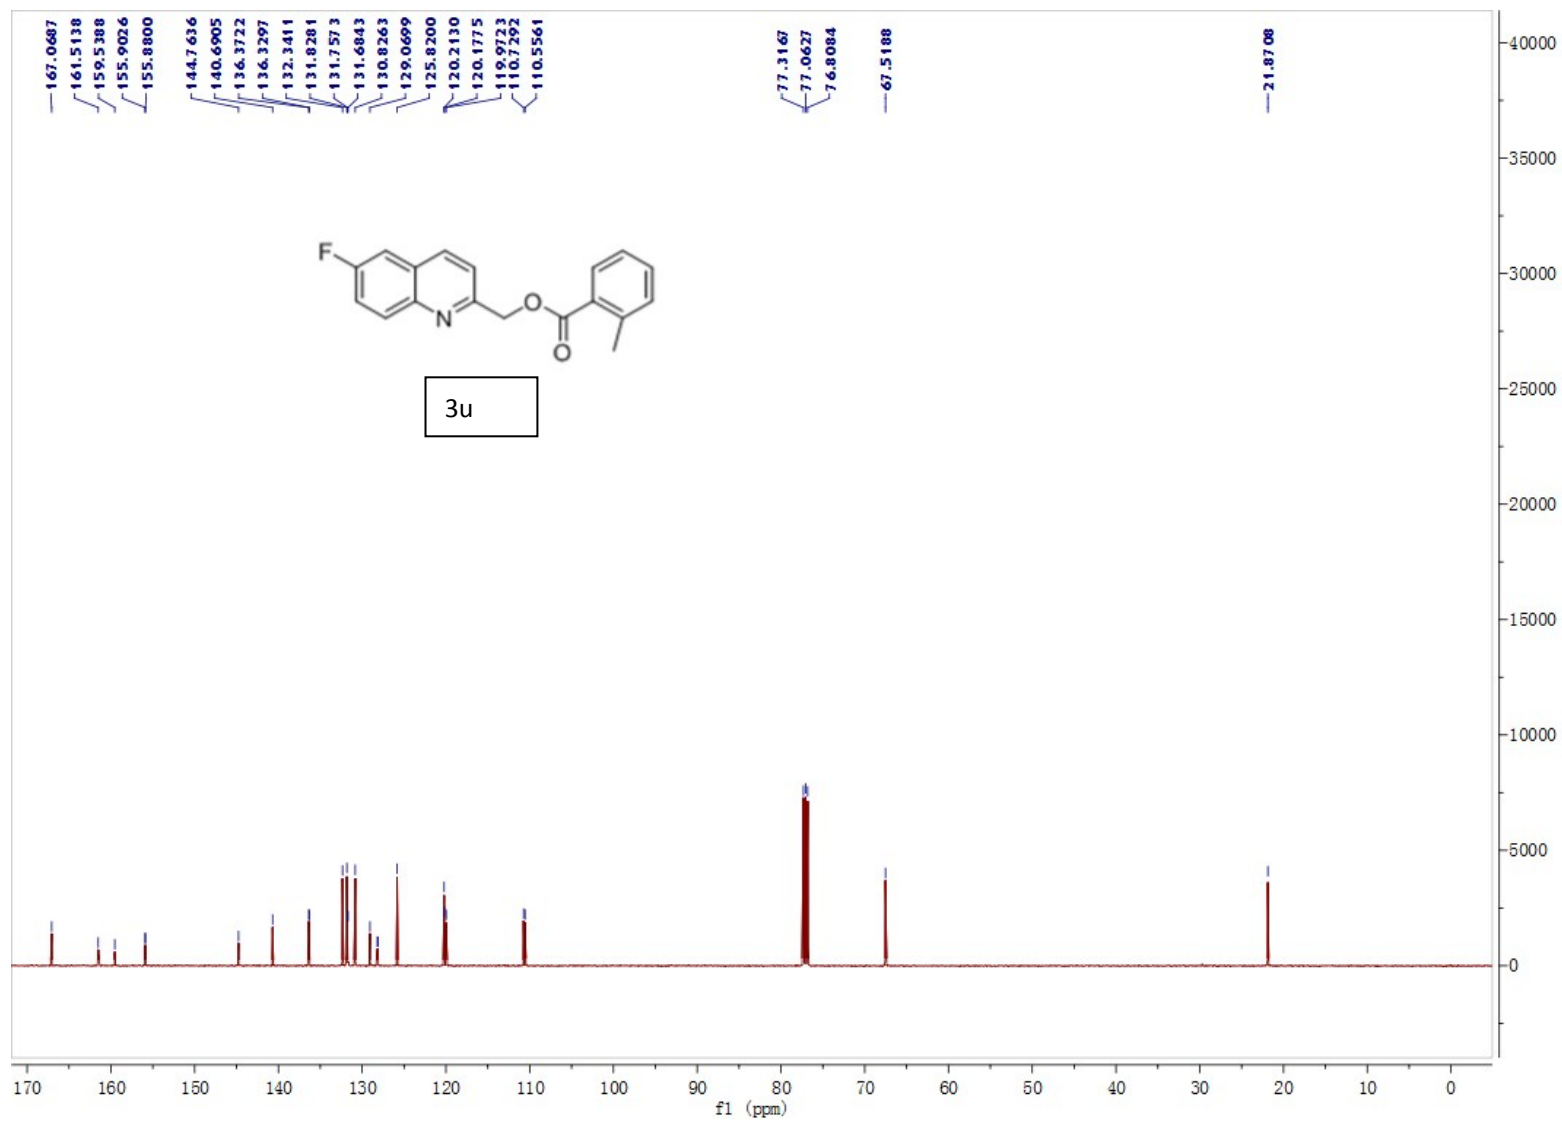



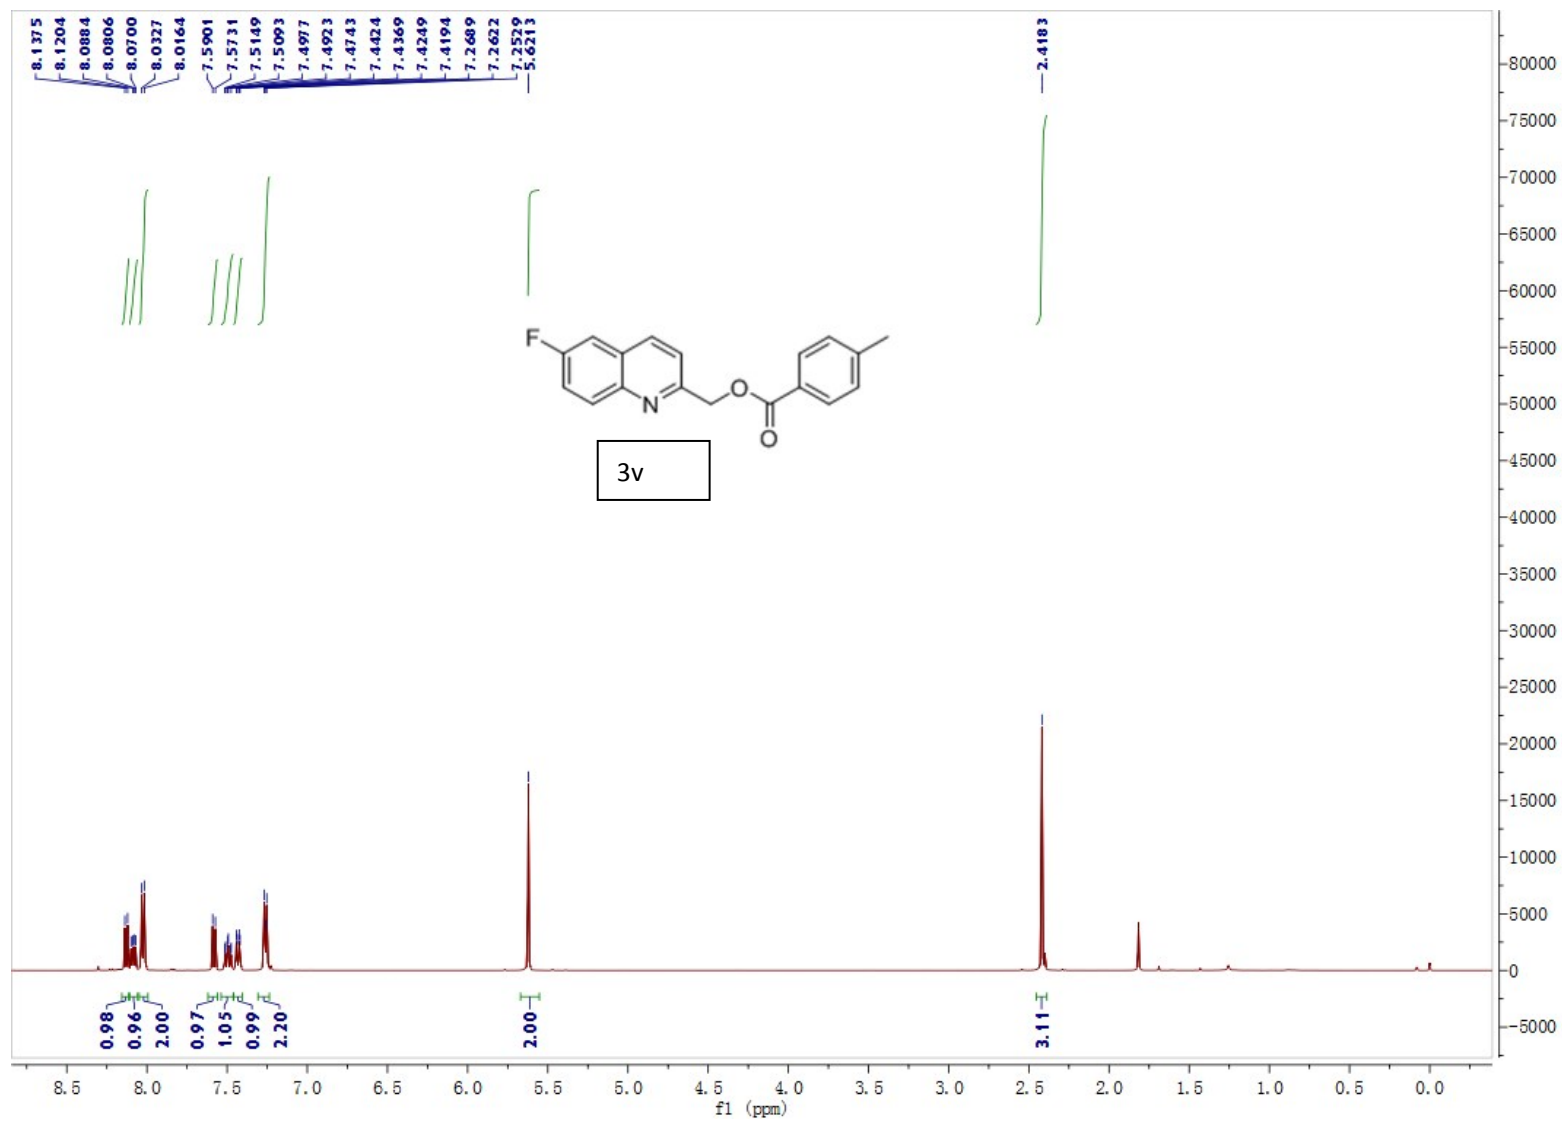

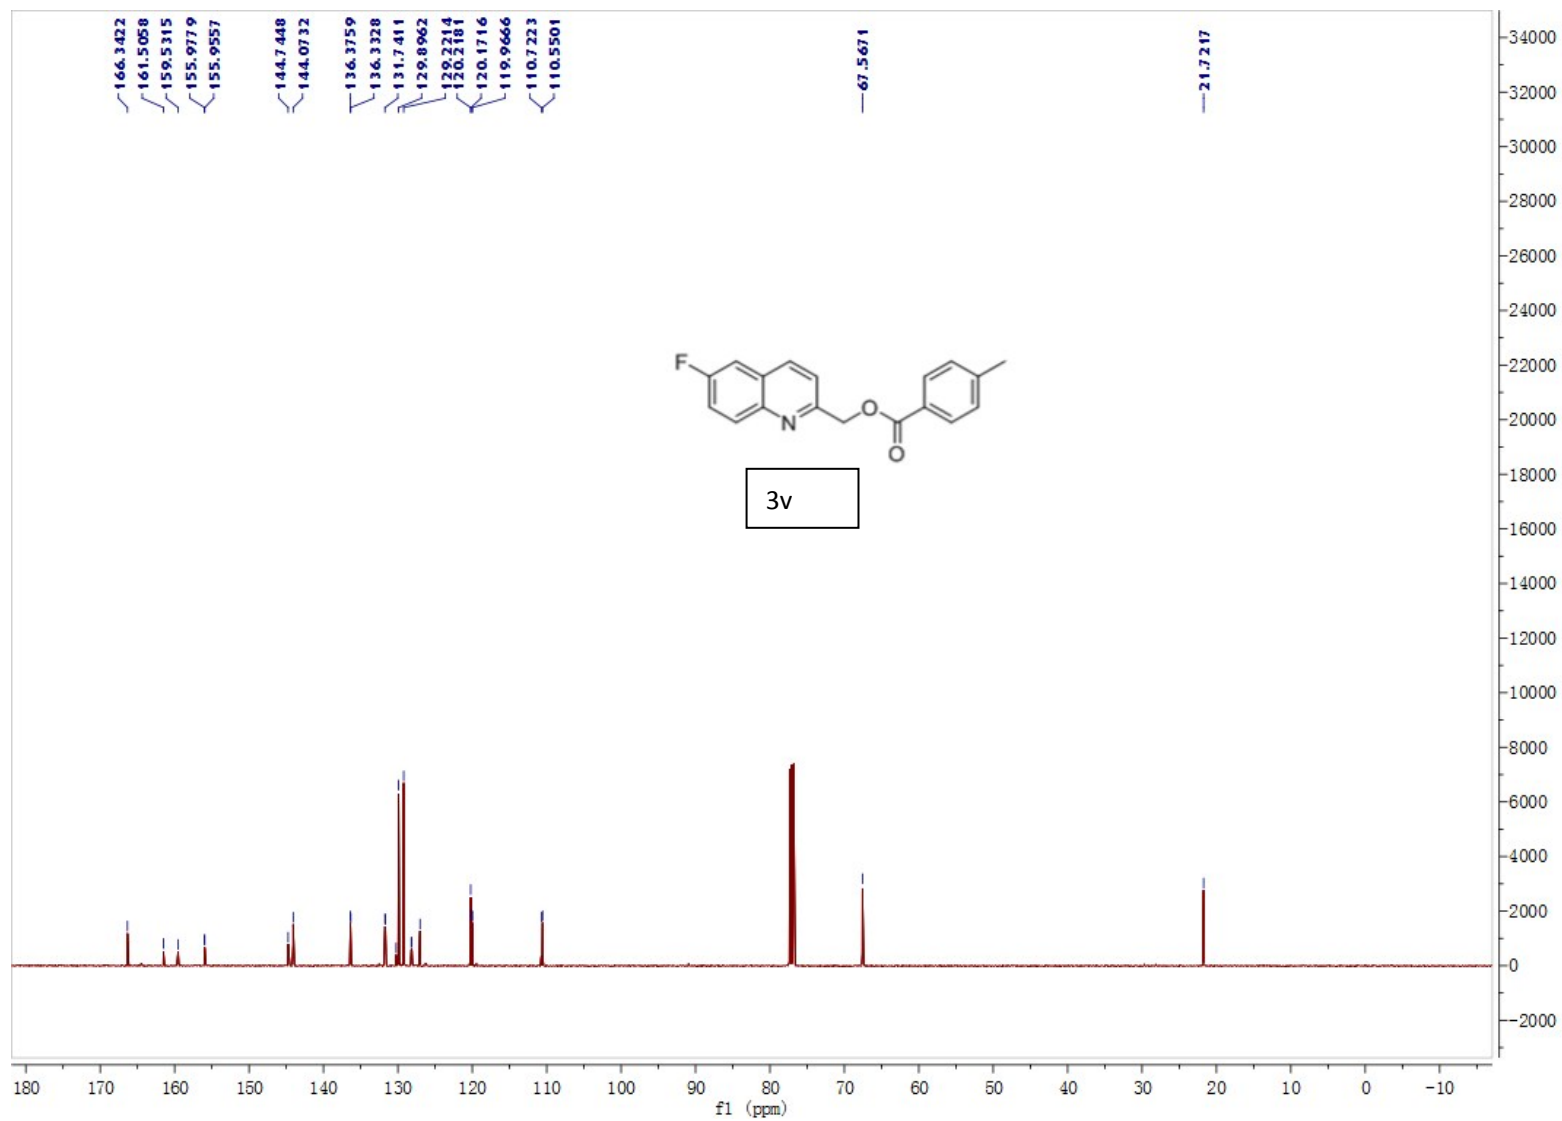

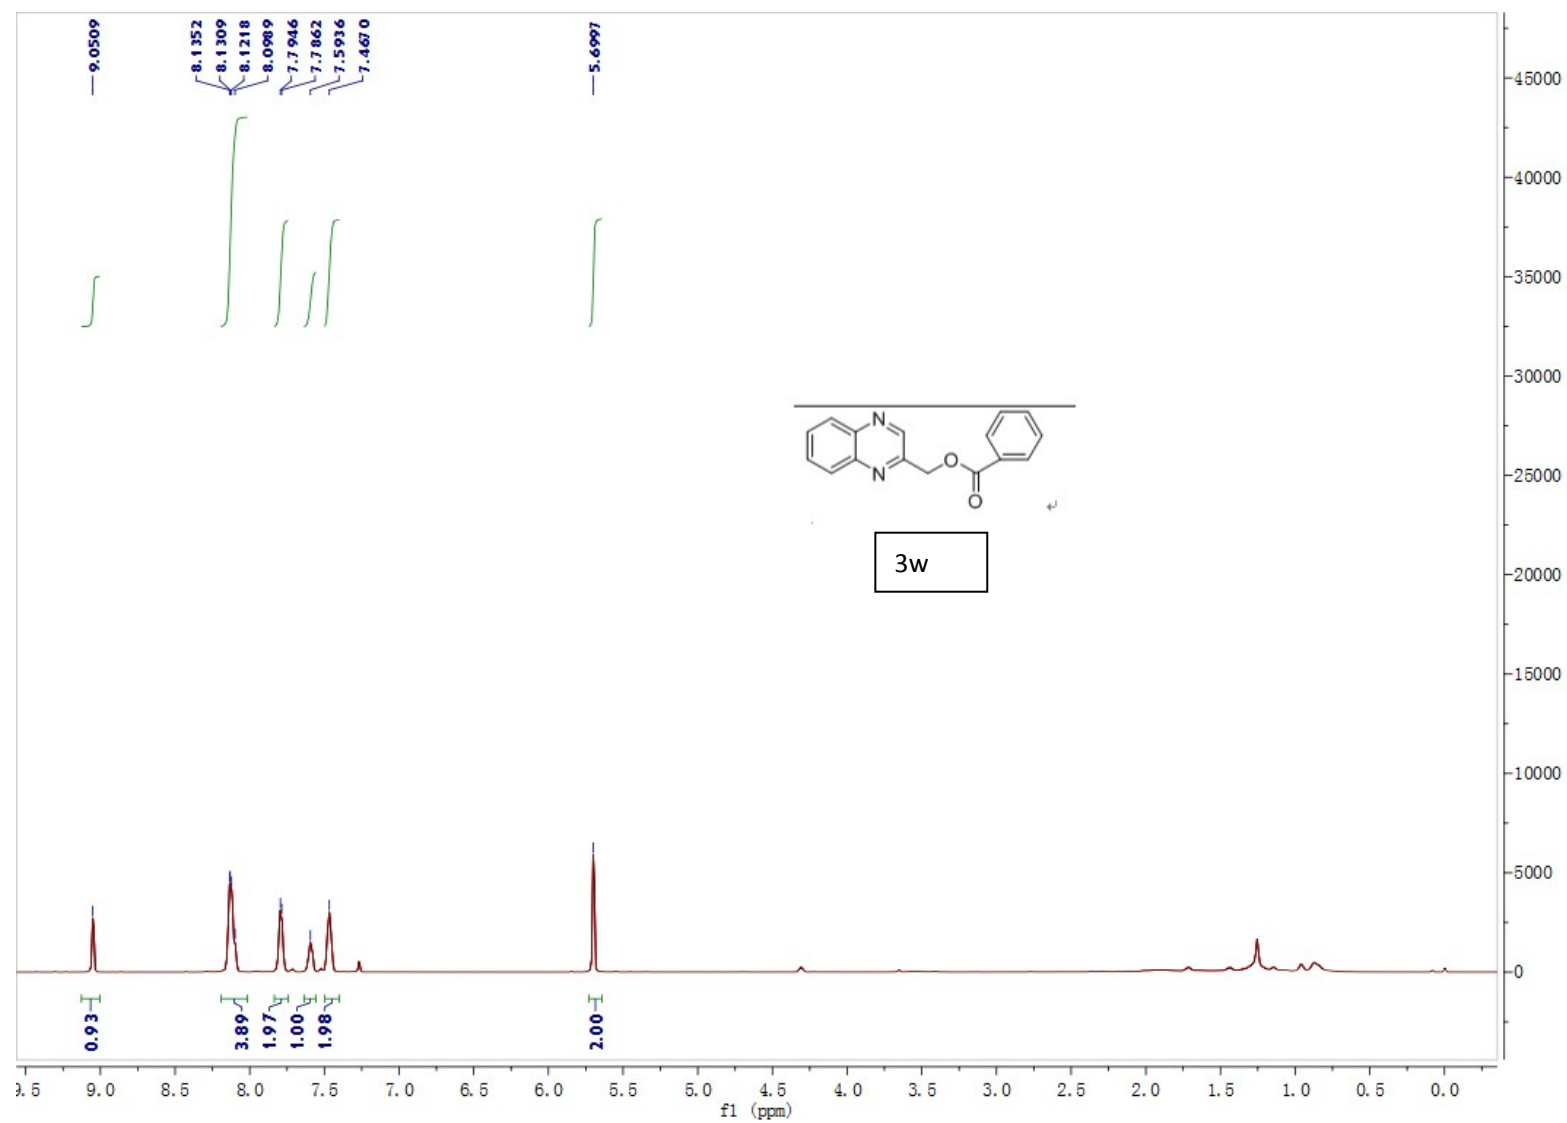

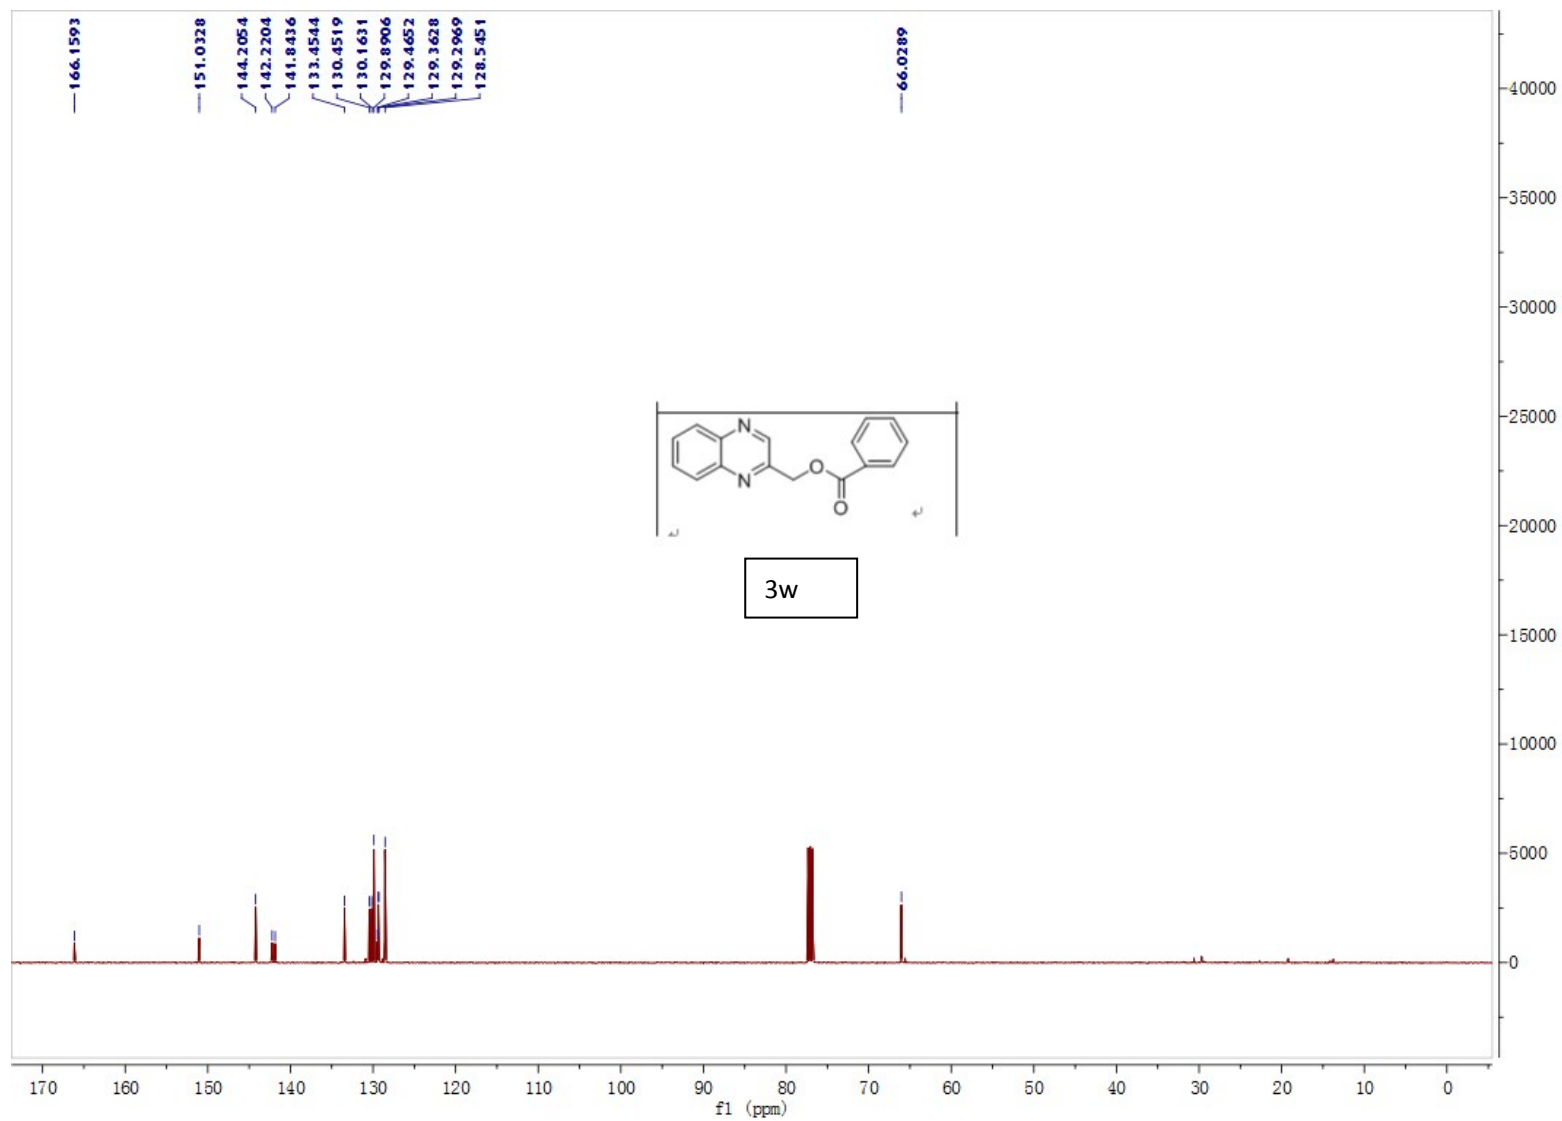

Supplement: c6ra26387a1.pdf [file c6ra26387a1.pdf]
